# Supplementary material for: Cultivation and Genomic Characterization of the Bile Bacterial Species From Cholecystitis Patients
Source: Front Microbiol. 2021 Nov 1;12:739621. doi: 10.3389/fmicb.2021.739621 (PMC8591784; doi:10.3389/fmicb.2021.739621)
Supplement: Supplementary file 2 [file Data_Sheet_1.xlsx]

## Sheet: ST1
Table S1| Detailed information of 138 bile isolates.
Strain ID	Subject ID	Oxygen (Y/N)	Condition	Phylum	Class	Order	Family	Genus	Genus score	NCBI BLAST result	% Coverage	% Identity	16S rRNA gene sequences
D001	2508	Y	GAM	Firmicutes	Bacilli	Lactobacillales	Lactobacillaceae	Lactobacillus	1	Uncultured bacterium clone AN5E2	1	1	TGCAAGTCGAGCGAATGGATTGAGAGCTTGCTCTCATGAAGTTAGCGGCGGACGGGTGAGTAACACGTGGGTAACCTGCCCATAAGACTGGGATAACTCCGGGAAACCGGGGCTAATACCGGATAACATTTTGAACTGCATGGTTCGAAATTGAAAGGCGGCTTCGGCTGTCACTTATGGATGGACCCGCGTCGCATTAGCTAGTTGGTGAGGTAACGGCTCACCAAGGCAACGATGCGTAGCCGACCTGAGAGGGTGATCGGCCACACTGGGACTGAGACACGGCCCAGACTCCTACGGGAGGCAGCAGTAGGGAATCTTCCGCAATGGACGAAAGTCTGACGGAGCAACGCCGCGTGAGTGATGAAGGCTTTCGGGTCGTAAAACTCTGTTGTTAGG…
D002	2508	Y	GAM	Proteobacteria	Gammaproteobacteria	Pseudomonadales	Moraxellaceae	Psychrobacter	1	Uncultured bacterium clone Filter_B_89	1	1	TGCAAGTCGAGCGGTAACAGGAGAAGCTTGCTTCTCGCTGACGAGCGGCGGACGGGTGAGTAATACTTAGGAATCTACCTAGTAGTGGGGGATAGCTCGGGGAAACTCGAATTAATACCGCATACGACCTACGGGAGAAAGGGGGCAACTTGTTGCTCTCGCTATTAGATGAGCCTAAGTCGGATTAGCTAGATGGTGGGGTAAAGGCCTACCATGGCGACGATCTGTAGCTGGTCTGAGAGGATGATCAGCCACACCGGGACTGAGACACGGCCCGGACTCCTACGGGAGGCAGCAGTGGGGAATATTGGACAATGGGGGCAACCCTGATCCAGCCATGCCGCGTGTGTGAAGAAGGCCTTTTGGTTGTAAAGCACTTTAAGCAGTGAAGAAGACTCC…
D003	2508	Y	GAM	Proteobacteria	Gammaproteobacteria	Pseudomonadales	Moraxellaceae	Psychrobacter	1	Uncultured bacterium clone Filter_B_89	1	1	TGGTGATCGCCTTCCTAAAAGGTTAGGCTAACCACTTCTGGTGCAATCAACTCCCATGGTGTGACGGGCGGTGTGTACAAGGCCCGGGAACGTATTCACCGCGGCATTCTGATCCGCGATTACTAGCGATTCCTACTTCATGGAGTCGAGTTGCAGACTCCAATCTGGACTACGATAGGCTTTTTGAGATTCGCATCACATCGCTGTGTAGCTGCCCTCTGTACCTACCATTGTAGCACGTGTGTAGCCCTGGTCGTAAGGGCCATGATGACTTGACGTCGTCCCCGCCTTCCTCCAGTTTGTCACTGGCAGTATCCTTAGAGTTCCCGGCCAAACCGCTGGTAACTAAGGACAAGGGTTGCGCTCGTTGCGGGACTTAACCCAACATCTCACGACACG…
D004	2508	Y	GAM	Proteobacteria	Gammaproteobacteria	Pseudomonadales	Moraxellaceae	Psychrobacter	1	Uncultured bacterium clone Filter_B_89	1	1	TGCAAGTCGAGCGGTAACAGGAGAAGCTTGCTTCTCGCTGACGAGCGGCGGACGGGTGAGTAATACTTAGGAATCTACCTAGTAGTGGGGGATAGCTCGGGGAAACTCGAATTAATACCGCATACGACCTACGGGAGAAAGGGGGCAACTTGTTGCTCTCGCTATTAGATGAGCCTAAGTCGGATTAGCTAGATGGTGGGGTAAAGGCCTACCATGGCGACGATCTGTAGCTGGTCTGAGAGGATGATCAGCCACACCGGGACTGAGACACGGCCCGGACTCCTACGGGAGGCAGCAGTGGGGAATATTGGACAATGGGGGCAACCCTGATCCAGCCATGCCGCGTGTGTGAAGAAGGCCTTTTGGTTGTAAAGCACTTTAAGCAGTGAAGAAGACTCC…
D005	2504	Y	GAM	Proteobacteria	Gammaproteobacteria	Enterobacteriales	Enterobacteriaceae	Escherichia-Shigella	1	Proteus mirabilis strain FDAARGOS_67	1	0.99	ACACATGCAAGTCGAGCGGTAACAGGAGACAGCTTGCTTTCTTGCTGACGAGCGGCGGACGGGTGAGTAATGTATGGGGATCTGCCCGATGGAGGGGGATAACTACTGGAAACGGTGGCTAATACCGCATAATGTCTACGGACCAAAGAAGGGGATCTTCGGACCTTGCGCTATCGGATGAGCCCATATGGGATTAGCTAGTAGGTGGGGTAAAGGCTCACCTAGGCGACGATCTCTAGCTGGTCTGAGAGGATGATCAGCCACACTGGGACTGAGACACGGCCCAGACTCCTACGGGAGGCAGCAGTGGGGAATATTGCACAATGGGCGCAAGCCTGATGCAGCCATGCCGCGTGTATGAAGAAGGCCTTAGGGTTGTAAAGTACTTTCAGCGGGGAG…
D006	2504	Y	GAM	Proteobacteria	Gammaproteobacteria	Enterobacteriales	Enterobacteriaceae	Enterobacter	0.93	Bacterium NLAE-zl-H160	0.99	0.94	AAGTGGTAGCGCCCTCCCGAAGGTTAAGCTACCTACTTCTTTTGCAACCCACTCCCATGGTGTGACGGGCGGTGTGTACAAGGCCCGGGAACGTATTCACCGTGGCATTCTGATCTACGATTACTAGCGATTCCGACTTCATGGAGTCGAGTTGCAGACTCCAATCCGGACTACGACGGACTTTATGAGTTCCGCTTGCTCTCGCGAGGTCGCTTCTCTTTGTATCTGCCATTGTAGCACGTGTGTAGCCCTGCTCGTAAGGGCCATGATGACTTGACGTCATCCCCACCTTCCTCCGGTTTATCACCGGCAGTCTCCTTTGAGTTCCCACCATTACGGGTTGGAAAAAAAGGAAAAGGGTTGCGTTCGTTGGGGAATTTACCCCAACATTTCACAACA…
D007	2504	Y	GAM	Proteobacteria	Gammaproteobacteria	Enterobacteriales	Enterobacteriaceae	Escherichia-Shigella	1	Proteus mirabilis strain 59qi	1	0.99	AGTCGAGCGGTAACAGGAGACAGCTTGCTTTCTTGCTGACGAGCGGCGGACGGGTGAGTAATGTATGGGGATCTGCCCGATGGAGGGGGATAACTACTGGAAACGGTGGCTAATACCGCATAATGTCTACGGACCAAAGAAGGGGCTCTTCGGACCTTGTACTATCGGATGAACCCATATGGGATTAGCTAGTAGGTGGGGTAAAGGCTCACCTAGGCGACGATCTCTAGCTGGTCTGAGAGGATGATCAGCCACACTGGGACTGAGACACGGCCCAGACTCCTACGGGAGGCAGCAGTGGGGAATATTGCACAATGGGCGCAAGCCTGATGCAGCCATGCCGCGTGTATGAAGAAGGCCTTAGGGTTGTAAAGTACTTTCAGCGGGGAGGAAGGTGAT…
D008	2504	Y	GAM	Proteobacteria	Gammaproteobacteria	Enterobacteriales	Enterobacteriaceae	Klebsiella	0.59	Uncultured Proteus sp. clone FLC134	1	0.95	CCCGAAGGTTAAGCTACCTACTTCTTTTGCAACCCACTCCCATGGTGTGACGGGCGGTGTGTACAAGGCCCGGGAACGTATTCACCGTAGCATTCTGATCTACGATTACTAGCGATTCCGACTTCATGGAGTCGAGTTGCAGACTCCAATCCGGACTACGACAGACTTTATGAGGTCCGCTTGCTCTCGCGAGGTCGCTTCTCTTTGTATCTGCCATTGTAGCACGTGTGTAGCCCTACTCGTAAGGGCCATGATGACTTGACGTCATCCCCACCTTCCTCCGGTTTATCACCGGCAGTCTCCTTTGAGTTCCCACCATTACGGGTTGGAAAAAAAGGAAAAGGGTTGCGCTCGTTGGGGAATTTAACCCAACATTTCACAACACGAGTTGACGACAGC…
D009	2504	Y	GAM	Proteobacteria	Gammaproteobacteria	Enterobacteriales	Enterobacteriaceae	Escherichia-Shigella	1	Proteus mirabilis strain FDAARGOS_67	0.99	0.98	CTACACATGCAAGTCGAGCGGTAACAGGAGAAAGCTTGCTTTCTTGCTGACGAGCGGCGGACGGGTGAGTAATGTATGGGGATCTGCCCGATGGAGGGGGATAACTACTGGAAACGGTGGCTAATACCGCATAATGTCTACGGACCAAAGAGGGGGATCTTCGGACCTTGTGCTATCGGATGAGCCCATATGGGATTAGCTAGTAGGTGGGGTAAAGGCTCACCTAGGCGACGATCTCTAGCTGGTCTGAGAGGATGATCAGCCACACTGGGACTGAGACACGGCCCAGACTCCTACGGGAGGCAGCAGTGGGGAATATTGCACAATGGGCGCAAGCCTGATGCAGCCATGCCGCGTGTATGAAGAAGGCCTTAGGGTTGTAAAGTACTTTCAGCGGGG…
D010	2504	Y	GAM	Proteobacteria	Gammaproteobacteria	Enterobacteriales	Enterobacteriaceae	Escherichia-Shigella	0.82	Proteus mirabilis strain FDAARGOS_60	0.99	0.93	GGTAAGCGCCCTCCCGAAGGTTAAGCTACCTACTTCTTTTGCAACCCACTCCCATGGTGTGACGGGCGGTGTGTACAAGGCCCGGGAACGTATTCACCGTAGCATTCTGATCTACGATTACTAGCGATTCCGACTTCATGGAGTCGAGTTGCAGACTCCAATCCGGACTACGACGGACTTTATGAGGTCCGCTTGCTCTCGCGAGGTCGCTTCTCTTTGTATCTGCCATTGTAGCACGTGTGTAGCCCTACTCGTAAGGGCCATGATGACTTGACGTCATCCCCACCTTCCTCCGGTTTATCACCGGCAGTCTCCTTTGAGTTCCCACCATTACGTGTTGGAAACAAAGGAAAAGGGTGGCGCTCGTTGGGGAATTAACCCCAACATTTCACAACACAA…
D011	2504	Y	LBB	Proteobacteria	Gammaproteobacteria	Enterobacteriales	Enterobacteriaceae	Escherichia-Shigella	1	Proteus mirabilis strain FDAARGOS_67	0.99	0.99	TGCAAGTCGAGCGGTAACAGGATAAGCTTGCTTTCTTGCTGACGAGCGGCGGACGGGTGAGTAATGTATGGGGATCTGCCTGATGGAGGGGGATAACTACTGGAAACGGTGGCTAATACCGCATAATGTCTACGGACCAAAGAAGGGGCTCTTCGGACCTTGCGCTATCGGATGAACCCATATGGGATTAGCTAGTAGGTGGGGTAAAGGCTCACCTAGGCGACGATCTCTAGCTGGTCTGAGAGGATGATCAGCCACACTGGGACTGAGACACGGCCCAGACTCCTACGGGAGGCAGCAGTGGGGAATATTGCACAATGGGCGCAAGCCTGATGCAGCCATGCCGCGTGTATGAAGAAGGCCTTAGGGTTGTAAAGTACTTTCAGCGGGGAGGAAGGT…
D012	2504	Y	LBB	Proteobacteria	Gammaproteobacteria	Enterobacteriales	Enterobacteriaceae	Escherichia-Shigella	0.85	Proteus mirabilis strain CLC-M11	1	0.93	TAGCGCCCTCCCGAAGGTTAAGCTACCTACTTCTTTTGCAACCCACTCCCATGGTGTGACGGGCGGTGTGTACAAGGGCCGGGAACGTATTCACCGTAGCATTCTGATCTACGATTACTAGCGATTCCGACTTCATGGAGTCGAGTTGCAGACTCCAATCCGGACTACGACGGACTTTATGAGGTCCGCTTGCTCTCGCGAGGTCGCTTCTCTTTGTATCTGCCATTGTAGCACGTGTGTAGCCCTGCTCGTAAGGGCCATGATGACTTGACGTCATCCCCACCTTCCTCCGGTTTATCACCGGCAGTCTCCTTTGAGTTCCCACCATTACGGGTTGGAAACAAAGGAAAAGGGTTGCGTTCGTTGGGGAATTTAACCCACAATTTCACAACACGAGTT…
D013	2504	Y	LBB	Proteobacteria	Gammaproteobacteria	Enterobacteriales	Enterobacteriaceae	Escherichia-Shigella	1	Proteus mirabilis strain FDAARGOS_67	0.99	0.98	TGGCAAGTCGAGCGGTAACAGGATAACGCTTGCTTTCTTGCTGACGAGCGGCGGACGGGTGAGTAATGTATGGGGATCTGCCTGATGGAGGGGGATAACTACTGGAAACGGTGGCTAATACCGCATAATGTCTACGGACCAAAGAAGGGGATCTTCGGACCTTGCGCTATCGGATGAACCCATATGGGATTAGCTAGTAGGTGGGGTAAAGGCTCACCTAGGCGACGATCTCTAGCTGGTCTGAGAGGATGATCAGCCACACTGGAACTGAGACACGGCCCAGACTCCTACGGGAGGCAGCAGTGGGGAATATTGCACAATGGGCGCAAGCCTGATGCAGCCATGCCGCGTGTATGAAGAAGGCCTTAGGGTTGTAAAGTACTTTCAGCGGGGAGGAAG…
D014	2504	Y	LBB	Proteobacteria	Gammaproteobacteria	Enterobacteriales	Enterobacteriaceae	Klebsiella	0.92	Proteus sp. strain KR 108	0.99	0.92	GCGCCCTCCCGAAGGTTAAGCTACCTACTTCTTTTGCAACCCACTCCCATGGTGTGACGGGCGGTGTGTACAAGGGCCGGGAACGTATTCACCGTAGCATTCTGATCTACGATTACTAACGATTCCGACTTCATGGAGTCGAGTTGCAGACTCCAATCCGGACTACGACGAACTTTATGAAGTCCGCTTGCTCTCGCGAGGTCGCTTCTCTTTGTATCTGCCATTGTAGCACGTGTGTAGCCCTACTCGTAAGGGCCATGATGACTTGACGTCATCCCCACCTTCCTCCGGTTTATCACCGGCAGTCTCCTTTGAGTTCCCACCATTACGTGTTGGAAAAAAAGGAAAAGGGTTGCGCTCGTTGCGGAATTTAACCCAACATTTCACAACACAAGTTGA…
D015	2504	Y	LBB	Proteobacteria	Gammaproteobacteria	Enterobacteriales	Enterobacteriaceae	Klebsiella	1	Uncultured organism clone ELU0159-T329-S-NIPCRAMgANa_000346	1	0.97	AGTCGAGCGGTAACAGGATACCGCTTGCTTTCTTGCTGACGAGCGGAGGACGGGTGAGTAATGTATGGGAATCTGCCTGATAGAGGGGGATAACTACTGGAAACGGTGGCTAATACCGCATAATGTCTACGGACCAAAGAAGGGGATCTTCGGACCTTGTACTATCGGATGAACCCATATGGGATTATCTAGTAGGTGGGGTAAAGGCTCACCTAGGCGACGATCTCTAGCTGGTCTGAGAGGATGATCAGCCACACTGGGACTGAGACACGGCCCAGACTCCTACGGGAGGCAGCAGTGGGGAATATTGCACAATGGGCGCAAGCCTGATGCGCCATGCCGCGTGTATGAAGAAGGCCTTAGGGTTGTAAAGTACTTTCAGCGGGGAGGAAGGGGATA…
D016	2504	Y	LBB	Proteobacteria	Gammaproteobacteria	Enterobacteriales	Enterobacteriaceae	Enterobacter	0.9	Bacterium NLAE-zl-H160	1	0.92	TCCCGAAGGTTAAGCTACCTACTTCTTTTGCAACCCACTCCCATGGTGTGACGGGCGGTGTGTACAAGGGCCGGGAACGTATTCACCGGAGCATTCTGATCCACGATTACTAACGATTCCGACTTCATGGAGTCGAGTTGCAGACTCCAATCCGGACTACGACGAACTTTATGAAGTCCGCTTGCTCTCGCGAGGTCGCTTCTCTTTGTATCTGCCATTGTAACACGTGTGTAACCCTACTCGTAAGGGCCATGATGACTTGACGTCATCCCCACCTTCCTCCGGTTTATCACCGGCAGTCTCCTTTGAGTTCCCACCATTACCTGTTGGAAACAAAGGAAAAGGGTTGCGCTCGTTGCGGAATTTACCCCAACATTTCACAACACAACTTGACAACAG…
D017	2504	Y	LBB	Firmicutes	Bacilli	Lactobacillales	Enterococcaceae	Enterococcus	1	Enterococcus faecalis strain HCD30-1	1	1	TGCAAGTCGAACGCTTCTTTCCTCCCGAGTGCTTGCACTCAATTGGAAAGAGGAGTGGCGGACGGGTGAGTAACACGTGGGTAACCTACCCATCAGAGGGGGATAACACTTGGAAACAGGTGCTAATACCGCATAACAGTTTATGCCGCATGGCATAAGAGTGAAAGGCGCTTTCGGGTGTCGCTGATGGATGGACCCGCGGTGCATTAGCTAGTTGGTGAGGTAACGGCTCACCAAGGCCACGATGCATAGCCGACCTGAGAGGGTGATCGGCCACACTGGGACTGAGACACGGCCCAGACTCCTACGGGAGGCAGCAGTAGGGAATCTTCGGCAATGGACGAAAGTCTGACCGAGCAACGCCGCGTGAGTGAAGAAGGTTTTCGGATCGTAAAACTC…
D018	2504	Y	LBB	Firmicutes	Bacilli	Lactobacillales	Enterococcaceae	Enterococcus	1	Enterococcus faecalis strain BR9-7	1	1	GGCTCCAAAAGGTTACCTCACCGACTTCGGGTGTTACAAACTCTCGTGGTGTGACGGGCGGTGTGTACAAGGCCCGGGAACGTATTCACCGCGGCGTGCTGATCCGCGATTACTAGCGATTCCGGCTTCATGCAGGCGAGTTGCAGCCTGCAATCCGAACTGAGAGAAGCTTTAAGAGATTTGCATGACCTCGCGGTCTAGCGACTCGTTGTACTTCCCATTGTAGCACGTGTGTAGCCCAGGTCATAAGGGGCATGATGATTTGACGTCATCCCCACCTTCCTCCGGTTTGTCACCGGCAGTCTCGCTAGAGTGCCCAACTAAATGATGGCAACTAACAATAAGGGTTGCGCTCGTTGCGGGACTTAACCCAACATCTCACGACACGAGCTGACGACA…
D019	2504	Y	LBB	Firmicutes	Bacilli	Lactobacillales	Enterococcaceae	Enterococcus	1	Enterococcus faecalis strain ZB16110904390	1	1	TGCAAGTCGAACGCTTCTTTCCTCCCGAGTGCTTGCACTCAATTGGAAAGAGGAGTGGCGGACGGGTGAGTAACACGTGGGTAACCTACCCATCAGAGGGGGATAACACTTGGAAACAGGTGCTAATACCGCATAACAGTTTATGCCGCATGGCATAAGAGTGAAAGGCGCTTTCGGGTGTCGCTGATGGATGGACCCGCGGTGCATTAGCTAGTTGGTGAGGTAACGGCTCACCAAGGCCACGATGCATAGCCGACCTGAGAGGGTGATCGGCCACACTGGGACTGAGACACGGCCCAGACTCCTACGGGAGGCAGCAGTAGGGAATCTTCGGCAATGGACGAAAGTCTGACCGAGCAACGCCGCGTGAGTGAAGAAGGTTTTCGGATCGTAAAACTC…
D020	2504	Y	LBB	Firmicutes	Bacilli	Lactobacillales	Enterococcaceae	Enterococcus	1	Bacterium strain IMAU11974	1	1	AGGCGGCTGGCTCCAAAAAGGTTACCTCACCGACTTCGGGTGTTACAAACTCTCGTGGTGTGACGGGCGGTGTGTACAAGGCCCGGGAACGTATTCACCGCGGCGTGCTGATCCGCGATTACTAGCGATTCCGGCTTCATGCAGGCGAGTTGCAGCCTGCAATCCGAACTGAGAGAAGCTTTAAGAGATTTGCATGACCTCGCGGTCTAGCGACTCGTTGTACTTCCCATTGTAGCACGTGTGTAGCCCAGGTCATAAGGGGCATGATGATTTGACGTCATCCCCACCTTCCTCCGGTTTGTCACCGGCAGTCTCGCTAGAGTGCCCAACTAAATGATGGCAACTAACAATAAGGGTTGCGCTCGTTGCGGGACTTAACCCAACATCTCACGACACGAG…
D021	2504	Y	LBB	Firmicutes	Bacilli	Lactobacillales	Enterococcaceae	Enterococcus	1	Enterococcus faecalis strain ZB16110904390	1	0.99	GCAAGTCGAACGCTTCTTTCCTCCCGAGTGCTTGCACTCAATTGGAAAGAGGAGTGGCGGACGGGTGAGTAACACGTGGGTAACCTACCCATCAGAGGGGGATAACACTTGGAAACAGGTGCTAATACCGCATAACAGTTTATGCCGCATGGCATAAGAGTGAAAGGCGCTTTCGGGTGTCGCTGATGGATGGACCCGCGGTGCATTAGCTAGTTGGTGAGGTAACGGCTCACCAAGGCCACGATGCATAGCCGACCTGAGAGGGTGATCGGCCACACTGGGACTGAGACACGGCCCAGACTCCTACGGGAGGCAGCAGTAGGGAATCTTCGGCAATGGACGAAAGTCTGACCGAGCAACGCCGCGTGAGTGAAGAAGGTTTTCGGATCGTAAAACTCT…
D022	2504	Y	BHI	Firmicutes	Bacilli	Lactobacillales	Enterococcaceae	Enterococcus	1	Enterococcus faecalis strain TY1	1	1	GCAAGTCGAACGCTTCTTTCCTCCCGAGTGCTTGCACTCAATTGGAAAGAGGAGTGGCGGACGGGTGAGTAACACGTGGGTAACCTACCCATCAGAGGGGGATAACACTTGGAAACAGGTGCTAATACCGCATAACAGTTTATGCCGCATGGCATAAGAGTGAAAGGCGCTTTCGGGTGTCGCTGATGGATGGACCCGCGGTGCATTAGCTAGTTGGTGAGGTAACGGCTCACCAAGGCCACGATGCATAGCCGACCTGAGAGGGTGATCGGCCACACTGGGACTGAGACACGGCCCAGACTCCTACGGGAGGCAGCAGTAGGGAATCTTCGGCAATGGACGAAAGTCTGACCGAGCAACGCCGCGTGAGTGAAGAAGGTTTTCGGATCGTAAAACTCT…
D023	2511	Y	BHI	Firmicutes	Bacilli	Lactobacillales	Enterococcaceae	Enterococcus	1	Enterococcus gallinarum strain HCD28-1	1	1	TGCAAGTCGAACGCTTTTTCTTTCACCGGAGCTTGCTCCACCGAAAGAAAAAGAGTGGCGAACGGGTGAGTAACACGTGGGTAACCTGCCCATCAGAAGGGGATAACACTTGGAAACAGGTGCTAATACCGTATAACACTATTTTCCGCATGGAAGAAAGTTGAAAGGCGCTTTTGCGTCACTGATGGATGGACCCGCGGTGCATTAGCTAGTTGGTGAGGTAACGGCTCACCAAGGCCACGATGCATAGCCGACCTGAGAGGGTGATCGGCCACACTGGGACTGAGACACGGCCCAGACTCCTACGGGAGGCAGCAGTAGGGAATCTTCGGCAATGGACGAAAGTCTGACCGAGCAACGCCGCGTGAGTGAAGAAGGTTTTCGGATCGTAAAACTCTG…
D024	2514	Y	BI	Firmicutes	Bacilli	Lactobacillales	Lactobacillaceae	Lactobacillus	1	Bacillus cereus strain LET 601	1	1	AGTCGAGCGAATGGATTAAGAGCTTGCTCTTATGAAGTTAGCGGCGGACGGGTGAGTAACACGTGGGTAACCTGCCCATAAGACTGGGATAACTCCGGGAAACCGGGGCTAATACCGGATAACATTTTGAACCGCATGGTTCGAAATTGAAAGGCGGCTTCGGCTGTCACTTATGGATGGACCCGCGTCGCATTAGCTAGTTGGTGAGGTAACGGCTCACCAAGGCAACGATGCGTAGCCGACCTGAGAGGGTGATCGGCCACACTGGGACTGAGACACGGCCCAGACTCCTACGGGAGGCAGCAGTAGGGAATCTTCCGCAATGGACGAAAGTCTGACGGAGCAACGCCGCGTGAGTGATGAAGGCTTTCGGGTCGTAAAACTCTGTTGTTAGGGAAG…
D025	2504	Y	BI	Proteobacteria	Gammaproteobacteria	Enterobacteriales	Enterobacteriaceae	Escherichia-Shigella	1	Proteus mirabilis strain 40X2	1	0.99	CTAACACATGCAAGTCGAGCGGTAACAGGAGAAAGCTTGCTTTCTTGCTGACGAGCGGCGGACGGGTGAGTAATGTATGGGGATCTGCCCGATGGAGGGGGATAACTACTGGAAACGGTGGCTAATACCGCATAATGTCTACGGACCAAAGAAGGGGATCTTCGGACCTTGTACTATCGGATGAGCCCATATGGGATTAGCTAGTAGGTGGGGTAAAGGCTCACCTAGGCGACGATCTCTAGCTGGTCTGAGAGGATGATCAGCCACACTGGGACTGAGACACGGCCCAGACTCCTACGGGAGGCAGCAGTGGGGAATATTGCACAATGGGCGCAAGCCTGATGCAGCCATGCCGCGTGTATGAAGAAGGCCTTAGGGTTGTAAAGTACTTTCAGCGGG…
D026	2504	Y	BI	Proteobacteria	Gammaproteobacteria	Enterobacteriales	Enterobacteriaceae	Escherichia-Shigella	0.98	Proteus mirabilis strain 23_R	1	0.9	AAGTGGTAAGCGCCCTCCCGAAGGTTAAGCTACCTACTTCTTTTGCAACCCACTCCCATGGTGTGACGGGCGGTGTGTACAAGGCCCGGGAACGTATTCACCGTGGCATTCTGATCTACGATTACTAGCGATTCCGACTTCATGGAGTCGAGTTGCAGACTCCAATCCGGACTACGACGGACTTTATGAGTTCCGCTTGCTCTCGCGAGGTCGCTTCTCTTTGTATCTGCCATTGTAGCACGTGTGTAGCCCTGCTCGTAAGGGCCATGATGACTTGACGTCATCCCCACCTTCCTCCGGTTTATCACCGGCAGTCTCCTTTGAGTTCCCACCCTTACCGGTTGGAAACAAAGGAAAAGGGTGGCGTTCGTTGGGGAATTTACCCCAACATTTCACAAC…
D027	2504	Y	BI	Proteobacteria	Gammaproteobacteria	Enterobacteriales	Enterobacteriaceae	Escherichia-Shigella	0.93	Proteus mirabilis	0.96	0.85	TCTACAATGCAGTCGAGCGCTTCATTCATACCGCTTGCTTTCTCTCTGACGAGAGGAGGACGGGTGAGTAGTGGATGGGGATCTGCCTGATGGAGGGGGATAACTACTGGAAACGGTAGCTAATACCGCTAATTGTCTACGGACCAAAGAAGGGGCTCTTCGGACCTGAAACTATCGGATGAACCCATATGGGATTATGGACCCGGTGTGGTAAAGGCTCACCTAGGCGACGATCTCTCCATGGTCTGAGAGGATGATCAACCACACTGGGGACTGAGACACGGCCCAGACTCCTACGGGAGGCCAGCACTCCTAGAATATTGCACAATGGGGAATCTTCTGATGTGGACATGCCGCTGGTATGAAGAAGGCCTTAGGGTTGAAAAGTACTTTCAGAGG…
D028	2504	Y	BI	Proteobacteria	Gammaproteobacteria	Enterobacteriales	Enterobacteriaceae	Enterobacter	0.55	Uncultured bacterium clone rRNA347	0.99	0.86	ACACCGTGGTAGCGCCCTCCCGAAGGGTAACCTACCTACTTCTTTTGGACCCACTCCCATGGTGTGACGGGCGGTGTGTACAAGGGCCGGGAACGTATTCAACGGAGCATTCTGATCCCGATTACTAACGATTCCGACTTCATGGAGTCGAGTTGCAGACTCCAATCCGGACTACGAAGAACTTTATGAAGACCGGTTGGTCTCGCGAGGTCACTTCTCTTTGGATCTGCCATTGGAACACGTGGGGAACCCTGCTCCATAGGGCCATGATGACTTGACGTCATCCCCACCTTCCTCCGGTTTATCACCGGCAGTCTCCTTTGAGTTCCCACCATTATGATTTGAACTAAAGGATAAGGGTTGCGCTCGTTGCGGAACTTAACCCAATCTTTCGACAAC…
D029	2504	Y	BI	Proteobacteria	Gammaproteobacteria	Enterobacteriales	Enterobacteriaceae	Klebsiella	0.69	Proteus sp. 118_5	0.98	0.94	AGTCGAGCGCTTCAGGATACCGCTTGCTTTCTTGCTGACGAGTGGAGGACGGGTGAGTAATGTATGGGGATCTGCCTGATGGAGGGGGATAACTACTGGAAACGGTAGCTAATACCGCATAATGTCTCCGGACCAAAGAAGGGGATCTTCGGACCTTGTACTATCGGATGAACCCATATGGGATTATCTAGTAGGTGGGGTAACGGCTCACCTAGGCGACGATCTCTAGCTGGTCTGAAAGGATGATCAACCACACTGGGACTGAGACACGGCCCAGACTCCTACGGGAGGCAGCACTCCTAGAATATTGCACAATGGGCGCAAGCCTGATGCGGCCATGCCGCGTGTATGAAGAAGGCCTTAGGGTTGTAAAGTACTTTCAGCGGGGAGGAAGGGGAT…
D030	2504	Y	BI	Proteobacteria	Gammaproteobacteria	Enterobacteriales	Enterobacteriaceae	Enterobacter	0.8	Bacterium NLAE-zl-H246	1	0.87	GCGCCCTCCCGAAGGGTAAGCTACCTACTTCTTTTGGACCCACTCCCATGGTGTGACGGGCGGTGTGTACAAGGGCCGGGAACGTATTCACCGGAGCATTCTGATCTACGATTACTAACGATTCCGACTTCATGGAGTCGAGTTGCAGACTCCAATCCGGACTACGACGAACTTTATGAAGACCGCTTGCTCTCGCGAGGTCACTTCTCTTTGTATCTGCCATTGGAACACGTGTGTAACCCTGCTCGTAAGGGCCATGATGACTTGACGTCATCCCCACCTTCCTCCGGTTTATCACCGGCAGTCTCCTTTGAGTTCCCACCATTACCTGTTGGAAACAAAGGAAAAGGGTTGCGTTCGTTGCGGAACTAAACCCAACATTTCGAACACAAGTTGACA…
D031	2504	N	BI	Proteobacteria	Gammaproteobacteria	Enterobacteriales	Enterobacteriaceae	Escherichia-Shigella	1	Proteus mirabilis strain 40X2	1	0.98	TGCAAGTCGAGCGGTAACAGGATAACGCTTGCTTTCTTGCTGACGAGCGGCGGACGGGTGAGTAATGTATGGGGATCTGCCTGATGGAGGGGGATAACTACTGGAAACGGTGGCTAATACCGCATAATGTCTCCGGACCAAAGAAGGGGCTCTTCGGACCTTGCACTATCGGATGAACCCATATGGGATTAGCTAGTAGGTGGGGTAAAGGCTCACCTAGGCGACGATCTCTAGCTGGTCTGAGAGGATGATCAGCCACACTGGGACTGAGACACGGCCCAGACTCCTACGGGAGGCAGCAGTGGGGAATATTGCACAATGGGCGCAAGCCTGATGCGCCATGCCGCGTGTATGAAGAAGGCCTTAGGGTTGTAAAGTACTTTCAGCGGGGAGGAAGGG…
D032	2504	N	BI	Proteobacteria	Gammaproteobacteria	Enterobacteriales	Enterobacteriaceae	Escherichia-Shigella	0.89	Proteus mirabilis strain 20932-1	0.99	0.92	TCCCGAAGGTTAAGCTACCTACTTCTTTTGCAACCCACTCCCATGGTGTGACGGGCGGTGTGTACAAGGGCCGGGAACGTATTCACCGTAGCATTCTGATCTACGATTACTAGCGATTCCGACTTCATGGAGTCGAGTTGCAGACTCCAATCCGGACTACGACGGACTTTATGAGGTCCGCTTGCTCTCGCGAGGTCGCTTCTCTTTGTATCTGCCATTGGAGCACGTGTGTAGCCCTACTCGTAAGGGCCATGATGACTTGACGTCATCCCCACCTTCCTCCGGTTTATCACCGGCAGTCTCCTTTGAGTTCCCACCATTACCGGTTGGAAAAAAAGGAAAAGGGTTGCGCTCGTTGGGGAATTTACCCCAACATTTCAAAAAAGAAGTTGACGACAG…
D033	2504	N	BI	Firmicutes	Bacilli	Lactobacillales	Enterococcaceae	Enterococcus	0.71	Enterococcus faecalis strain EQ56	1	0.95	TCCAGAAAGGTTACCTCACCGATTTCTTTGGTTACCAATTCTCTGTGGGGTGACGGGGGGGGGGTACAAGGCCCGGAAACGAATTCACCGCGGAGTGCTGATCCGCGATTACTAGCGATTCCGGCTTCATGAAGGCGAGTTGCAACCTGCAATCCGAATTGAGAGAAGTTTTAGAAGATTTGTAGGACCTCGGGGGCTACTGACTCTTTGAACTTCCCATTGAACAAGGGGGGAACCCCAGGCCATAAGGGGCATGATGATTTGACGTCATCCCCACCTTCCTCCGGTTTGCCACCGGCAGTCTCGCTAGAGTGCCCAACTAAATGATGGCAACTAACAATAAGGGTTGCGCTCGTTGCGGGACTTAACCCAACATCTCACGACACGAGCTGACGACAA…
D034	2504	N	BI	Firmicutes	Bacilli	Lactobacillales	Enterococcaceae	Enterococcus	0.77	Enterococcus sp. enrichment culture clone PTmrs14	1	0.91	GTCGAACGCTTCTTTCCTCCCGAGTGCTTGCTCTCTGTGAAAGGAGGAGGGGTGGACGGTGGAGGAACACGTGGCTAACCTACCCATCAGAGGGGGATAACACTTGGATCAGGTGCTAATACCGCATAACAGTTTATGCCGCATGCTTCAAGACTGAAAGGCGCTTTCGAGTGTCGCTGATGGATGGACCCGCGGTGCATTAGCTATCACCTAGAGGTAACGGCTTCCATGGCCACGATGGATAACCGACCTGATAGGGTGATCGACCACACTGGGACTGAGACACGACCCAGACTCCTACGATAAGGCAGCATGAGGGAATCTTCGGCAATGGACGAAAGTCTGACCGAGCAACGCCGCGTGAGTGAAGAAGGTTTTCGGATCGTAAAACTCTGTTGT…
D035	2504	N	BI	Proteobacteria	Gammaproteobacteria	Enterobacteriales	Enterobacteriaceae	Escherichia-Shigella	0.61	Proteus mirabilis strain FDAARGOS_67	1	0.95	CAAGTCGAACGGTTCAGGATACCGCTTGCTTTCTCGCTGACGAGCGGAGGACGGGTGAGTAATGTATGGGAATCTGCCTGATGGAGGGGGATAACTACTGGAAACGGTAGCTAATACCGCATAATGTCTCCGGACCAAAGAAGGGGCTCTTCGGACCTTGCGCTATCGGATGAACCCATATGGGATTAGCTAGTAGGTGGGGTAACGGCTCACCTAGGCGACGATCTCTAGCTGGTCTGAGAGGATGATCAGCCACACTGGAACTGAGACACGGCCCAGACTCCTACGGGAGGCAGCAGTGGGGAATATTGCACAATGGGCGCAAGCCTGATGCGCCATGCCGCGTGTATGAAGAAGGCCTTAGGGTTGTAAAGTACTTTCAGCGGGGAGGAAGGTGAT…
D036	2504	N	BI	Proteobacteria	Gammaproteobacteria	Enterobacteriales	Enterobacteriaceae	Klebsiella	0.79	Proteus penneri strain L1	1	0.86	TCCCGAAGGGTAAGCTACCTACTTCTTTTGGACCCACTCCCATGGTGTGACGGGCGGTGTGTACAAGGGCCGGGAACGTATTCACCGGAGCATTCTGATCTACGATTACTAACGATTCCCACTTCATGGAGTCGAGTTGCAGACTCCAATCCGGACTACGACGAACTTTATGAAGACCGCTTGCTCTCGCGAGGTCGCTTCTCTTTGTATCTGCCATTGGAACACGTGTGTAACCCTACTCGTAAGGGCCATGATGACTTGACGTCATCCCCACCTTCCTCCGGTTTATCACCGGCAGTCTCCTTTGAGTTCCCACCATTACCTGTTGGACTAAAGGAAAAGGGTTGCGTTCGTTGCGGAATTTAACCCAACATTTCGAAAACAAGTTGACAAACCCCA…
D037	2504	N	BI	Firmicutes	Bacilli	Lactobacillales	Enterococcaceae	Enterococcus	0.78	Enterococcus sp. enrichment culture clone PTmrs14	0.99	0.9	TGCAAGTCGAACGCTTCTTTCCTCCCGAGTGCTTGCTCTCTGACGAAAGGAGGAGGGGTGGACGGTGGAGGAACACGTGGCTGACCTACCCATCAGAGGGGGATAACACTTGGATCAGGTGCTAATACCGCATAACAGTTTATGCCGCATGGCATAAGAGTGAAAGGCGCTTTCGGGTGTCGCTGATGGATGGACCCGCGGTGCATTAGGCTCACCTAGAGGTAACGGCTCACCATGGCCACAATGGATAATCGACCTGATAGGGTGATCGGCCACACTGGGACTGAGACACGGCCCAGACTCCTACAGGAGGCAGCATGGGGAATCTTCGATGTGGACGAAAGTCTGACCGAGCAAGCCGCGTGAGTGAAGAAGGTTTTCGGATCGTAAAACTCTGTT…
D038	2504	N	BI	Proteobacteria	Gammaproteobacteria	Enterobacteriales	Enterobacteriaceae	Escherichia-Shigella	1	Proteus mirabilis strain FDAARGOS_67	0.99	0.98	CTACACATGCAAGTCGAGCGGTAACAGGAGAAAGCTTGCTTTCTTGCTGACGAGCGGCGGACGGGTGAGTAATGTATGGGGATCTGCCCGATGGAGGGGGATAACTACTGGAAACGGTGGCTAATACCGCATAATGTCTACGGACCAAAGAGGGGGATCTTCGGACCTTGTGCTATCGGATGAGCCCATATGGGATTAGCTAGTAGGTGGGGTAAAGGCTCACCTAGGCGACGATCTCTAGCTGGTCTGAGAGGATGATCAGCCACACTGGGACTGAGACACGGCCCAGACTCCTACGGGAGGCAGCAGTGGGGAATATTGCACAATGGGCGCAAGCCTGATGCAGCCATGCCGCGTGTATGAAGAAGGCCTTAGGGTTGTAAAGTACTTTCAGCGGGG…
D039	2514	Y	GAM	Firmicutes	Bacilli	Bacillales	Paenibacillaceae	Paenibacillus	0.1	Paenibacillus sp. H203	0.99	0.88	TCACTTCCGAGGCTGGCTCACGTAGGGGGACCCCATCGACTTCGGGGGTTGCAAATTCTCGGGGTGTGACGGGGGGGGGGTACAAGACCCGGAAACGTATTCACCGAGCGATGCTGATCCGCGATTACTAGCAATTCCGACTTCATGGAGGCGAGTTGCAGACTGCAATCCGAACTGAGACTGGCTTTTATAGGATTGGGTCCCCCTCGGGGCTTCGCTTCCCGTTGAACCACCCATTGAAGAAGGGGGGTACCCCAAGTCATAAGGGGAATGATGATTTGACGTCTCCCCCGCCTTCCTCCGGTTTGCCCCCGCAAGCCATTCTGAAGCGCCCACCCAAAGTGCTGGCAACTAAAAACAAGGGTTGCGCTCGTTGCGGGACTTAACCCAACATCTCAC…
D040	2514	Y	GAM	Firmicutes	Bacilli	Bacillales	Paenibacillaceae	Paenibacillus	0.41	Paenibacillus sp. Y412MC10	1	0.89	TGCAAGTCGAGCGGACCTGATGGAGTGCTTGCACTCCTGAAGGTTAACGGGTGCGGGTGAGTAACACGAACGGACCCTGCCCTCAGGATTGGGTTAACTACCGGAAACGGTTACTAATACCGAACATTTTATTTTGCAGCATTGTGGAAGTTGAAAGGCGGAAGATCTGCCGCGGAGGATGGGCCTGCGGCGCATTAGCTACCTACCGGGGTAACGGCCCACCAAGGCGACTATGAGGAGCGACCTGAGAGGGTGAACGACCACACTGCGACTGAGACACGGCCCAGACTCCTACGGAAGGCAGCAGTAGGGAATCTTCCGCAATGGGCGAAAGCCTGACGGAGCAACGCCGCCTGAGTGATGAAGGTTTTCGGATCTAAAAGCTCTGTTGCCATGGAA…
D041	2514	Y	GAM	Firmicutes	Bacilli	Bacillales	Planococcaceae	Lysinibacillus	1	Lysinibacillus sp. LS-065	1	1	TGCAAGTCGAGCGAACAGAAAAGGAGCTTGCTCCTTTGACGTTAGCGGCGGACGGGTGAGTAACACGTGGGCAACCTACCCTATAGTTTGGGATAACTCCGGGAAACCGGGGCTAATACCGAATAATCTCCTTTACTTCATGGTGAAGGACTGAAAGACGGTTTCGGCTGTCGCTATAGGATGGGCCCGCGGCGCATTAGCTAGTTGGTGAGGTAACGGCTCACCAAGGCGACGATGCGTAGCCGACCTGAGAGGGTGATCGGCCACACTGGGACTGAGACACGGCCCAGACTCCTACGGGAGGCAGCAGTAGGGAATCTTCCACAATGGGCGAAAGCCTGATGGAGCAACGCCGCGTGAGTGAAGAAGGTTTTCGGATCGTAAAACTCTGTTGTAAGG…
D042	2504	N	GAM	Firmicutes	Bacilli	Lactobacillales	Enterococcaceae	Enterococcus	0.76	Enterococcus faecalis strain EQ56	1	0.94	TCCGAAGGTTACCTCACCAATTTCTTTGGTTACCAATTCTCGTGTGGTGAGGGCGGGGGGGTAAAGGCCCGGAAACGAATCACCCGCGGCGTGCTGATCCGCGATTACTAGCGATTCCGGCTTCATGAAGGCGAGTTGCAACCTGCAATCCGAATTGAGAGAAGTTTTAGAAGATTTGTAGGACCTCGGGGGCTACTGACTCTTTGAACTTCCCATTGAACAAGGGGGGTACCCCAGGTCATAGGGGCAATGATGATTTGACGTCATCCCCACCTTCCTCCGGTTTGCCACCGGCAGTCTCTTTAGAGTGCCCAAATAAATGATGGCAACTAACAATAAGGGTTGCGCTCGTTGCGGGACTTAACCCAACATCTCACGACACGAGCTGACGACAACCAT…
D043	2504	N	GAM	Firmicutes	Bacilli	Lactobacillales	Enterococcaceae	Enterococcus	0.43	Enterococcus sp. enrichment culture clone PTmrs14	0.93	0.85	TGCAGTCGAACGCTTCTTTCCTCCCGAGTGCTTGCTCTCTGACGAAAGGAGGAGGGGTGGATGGTGGAGTAACACGTGGCTGACCTACCCATCAGAGGGGTATAACACTTGGATCAGGTGCTAATACCGCATAACAGTTTATGCCGCATCTTCAAGACTGAAAGGCGCTTTCGAGTGTCATTGATGGATGGACCCGCGGTGCATTCGGCTCACCTAGAGGTCGATCCTCACCATGGCCTGAAAGGATGATCGACCTGATAGGGTGATCGACCACACTGGGACTGAGACACGAGGCCAGACTCCTACAATATTGCAGCATGGGGAATCTTCTGAAATGGACGAAAGTCTGACCGAAGACGCCGCGTGAGTGAAGAAGGTTTTCGGATCGTAAAACTCTGT…
D044	2504	N	GAM	Firmicutes	Bacilli	Lactobacillales	Enterococcaceae	Enterococcus	0.61	Enterococcus sp. enrichment culture clone PTmrs16	0.48	0.99	TGCAAGTCGACGCTTCTTTCCTCCCGAGTGCTTGCACTCTTTGGAAGGAGGAGTGGCGGACGGGGGAGTAACACGTGGGTAACCTACCCATCAGAGGGGGATAACACTTGGAAACAGGTGCTAATACCGCATAACAGTTTATGCCGCATGGCATAAGAGTGAAAGGCGCTTTCGGGTGTCGCTGATGGATGGACCCGCGGTGCATTAGCTAGTTGGTGAGGTAACGGCTCACCAAGGCCACGATGCATAGCCGACCTGAGAGGGTGATCGGCCACACTGGGACTGAGACACGGCCCAGACTCCTACGGGAGGCAGCAGTAGGGAATCTTCGGCAATGGACGAAAGTCTGACCGAGCAACGCCGCGTGAGCGAAGAAGGTTTTTGCATCGTAAAACTCTG…
D045	2504	N	GAM	Firmicutes	Bacilli	Lactobacillales	Enterococcaceae	Enterococcus	0.4	Uncultured organism clone ELU0150-T457-S-NIPCRAMgANa_000467	0.65	0.9	AAATGTATCCACGTTAGGCGGCTGGCTCCAGAAGGTTACCTCACCGACTTCTGGTGTTACAAACTCTCGTGTTGTGACGGGCGTGGTGTACAAGGCCCGGAAACGTATTCACCGCGGCGTGCTGATCCGCGATTACTACCGATTCCGGCTTCATGCAGGCGAGTTGCAACCTGCAATCCGAACTGAAAGAAGCTTTAAAAGATTTGTTGGACCTCGCGGGCTACTTCCTCTTTGTACTTCCCTTTGAACAACGGGGGTACCCCAGGTCATAGGGGGCATGATGATTGAACGTCATCCCCCCCTTCCTCCGGTTTGTCACCGGCAATCTCTTTAAGTTGCCCAAATAAATGATGGCAACTAACAATAAGGGTTGCGCTCGTTGCGGGACTTAATCCAACC…
D046	2504	N	GAM	Firmicutes	Bacilli	Bacillales	Planococcaceae	Lysinibacillus	0.67	Lysinibacillus sp. strain Firmi-5	0.99	0.86	TGCAAGTCGAGCGATCAGAAGAGGAGCTTGGTTCTTTGACTGTCGAGGGGGACGGGGGAGTAACACGTGGGCAACCTACCCTATTTTTGGGATAACTCCGGGAAACCGGGGCTAATACCCAATAATCTCCTTTACTTCATGGAGAGGGACTGACAGACCTTTTCCGCTGGCACTATCCCATGGGCCCTCGGCTCATTAGCTAGGTGGTGAGTCAACTACTCAACAATGCCACGATGCGCAGACAACCTGAGAGGGTGATCTGCCACTGTGAGACTGAGACACGGCCCACACTCCTACGGGAGGCAGAATATTGGAATCTTCCACCATGGCTGAAAGCCTGATGGAGCAACGCCGAGTGAGTGAAGAAGGTTTTCGGATCGTTTCACTCTGTTGGAAGGG…
D047	2504	N	GAM	Firmicutes	Bacilli	Bacillales	Planococcaceae	Lysinibacillus	0.27	Lysinibacillus sp. strain Firmi-27	0.99	0.95	CTGCGGCGGCTGCGCTCCAGAAGGTTACCTTACCGACTTCTTTGTGTATACCAACTCTCATGGGTGTGACGGGCGGTGTGTACAAGGCCCGGGAACGTATTCACCGCGGCATGCTGATCCGCGATTACTAGCGATTCCGACTTCATGGAGGCGAGTTGCAGACTACAATCCGAACTGAGAACGACTTTATCAGATTAGCTCGCTCTCGCGAGGTGGCTTCCGTTTGTATCGGCCATTGTAGCACGTGTGTAGCCCAGGTCATAAGGGGCATGATGATTTGACGTCATCCCCACCTTCCTCCGGTTTGTCACCGGCAGTCACCTTAGAGTGCCCAACTAAATGATGGCAACTAAAATCATGGGTTGCGCTCGTTGCGGGACTTAACCCAACATCTCACGA…
D048	2504	N	GAM	Proteobacteria	Gammaproteobacteria	Enterobacteriales	Enterobacteriaceae	Escherichia-Shigella	1	Proteus mirabilis strain FDAARGOS_67	1	0.98	TGCAAGTCGAGCGGTAACAGGAGACAGCTTGCTTTCTCGCTGACGAGCGGCGGACGGGTGAGTAATGTATGGGGATCTGCCCGATGGAGGGGGATAACTACTGGAAACGGTGGCTAATACCGCATAACGTCTACGGACCAAAGAAGGGGATCTTCGGACCTTGCGCTATCGGATGAGCCCATATGGGATTAGCTAGTAGGTGGGGTAAAGGCTCACCTAGGCGACGATCTCTAGCTGGTCTGAGAGGATGATCAGCCACACTGGGACTGAGACACGGCCCAGACTCCTACGGGAGGCAGCAGTGGGGAATATTGCACAATGGGCGCAAGCCTGATGCAGCCATGCCGCGTGTATGAAGAAGGCCTTAGGGTTGTAAAGTACTTTCAGCGGGGAGGAAGG…
D049	2504	N	GAM	Proteobacteria	Gammaproteobacteria	Enterobacteriales	Enterobacteriaceae	Escherichia-Shigella	0.95	Proteus mirabilis strain E11	1	0.91	GTAAGCGCCCTCCCGAAGGTTAAGCTACCTACTTCTTTTGCAACCCACTCCCATGGTGTGACGGGCGGTGTGTACAAGGCCCGGGAACGTATTCACCGTAGCATTCTGATCTACGATTACTAGCGATTCCGACTTCATGGAGTCGAGTTGCAGACTCCAATCCGGACTACGACGGACTTTATGAGTTCCGCTTGCTCTCGCGAGGTCGCTTCTCTTTGTATCTGCCATTGTAGCACGTGTGTAGCCCTACTCGTAAGGGCCATGATGACTTGACGTCATCCCCACCTTCCTCCGGTTTATCACCGGCAGTCTCCTTTGAGTTCCCACCATTACGGGTTGGAAAAAAAGGAAAAGGGTGGCGCTCGTTGGGGAATTAACCCCAACATTTCACAACACGAG…
D050	2504	N	GAM	Firmicutes	Bacilli	Lactobacillales	Enterococcaceae	Enterococcus	1	Bacterium strain IMAU11978	1	0.99	TCCAAAAGGTTACCTCACCGACTTCGGGTGTTACAAACTCTCGTGGTGTGACGGGCGGTGTGTACAAGGCCCGGGAACGTATTCACCGCGGCGTGCTGATCCGCGATTACTAGCGATTCCGGCTTCATGCAGGCGAGTTGCAGCCTGCAATCCGAACTGAGAGAAGCTTTAAGAGATTTGCATGACCTCGCGGGCTAGCGACTCGTTGTACTTCCCATTGTAGCACGTGTGTAGCCCAGGTCATAAGGGGCATGATGATTTGACGTCATCCCCACCTTCCTCCGGTTTGTCACCGGCAGTCTCGCTAGAGTGCCCAACTAAATGATGGCAACTAACAATAAGGGTTGCGCTCGTTGCGGGACTTAACCCAACATCTCACGACACGAGCTGACGACAACC…
D051	2504	N	GAM	Firmicutes	Bacilli	Lactobacillales	Enterococcaceae	Enterococcus	1	Enterococcus faecalis strain FMA797	1	0.99	TGCAAGTCGAACGCTTCTTTCCTCCCGAGTGCTTGCACTCTTTGGAAAGAGGAGTGGCGGACGGGTGAGTAACACGTGGGTAACCTACCCATCAGAGGGGGATAACACTTGGAAACAGGTGCTAATACCGCATAACAGTTTATGCCGCATGGCATAAGAGTGAAAGGCGCTTTCGGGTGTCGCTGATGGATGGACCCGCGGTGCATTAGCTAGTTGGTGAGGTAACGGCTCACCAAGGCCACGATGCATAGCCGACCTGAGAGGGTGATCGGCCACACTGGGACTGAGACACGGCCCAGACTCCTACGGGAGGCAGCAGTAGGGAATCTTCGGCAATGGACGAAAGTCTGACCGAGCAACGCCGCGTGAGTGAAGAAGGTTTTCGGATCGTAAAACTCT…
D052	2504	Y	CBA	Firmicutes	Bacilli	Lactobacillales	Enterococcaceae	Enterococcus	1	Enterococcus faecalis strain BR9-7	1	1	GGCTGGCTCCAAAAGGTTACCTCACCGACTTCGGGTGTTACAAACTCTCGTGGTGTGACGGGCGGTGTGTACAAGGCCCGGGAACGTATTCACCGCGGCGTGCTGATCCGCGATTACTAGCGATTCCGGCTTCATGCAGGCGAGTTGCAGCCTGCAATCCGAACTGAGAGAAGCTTTAAGAGATTTGCATGACCTCGCGGTCTAGCGACTCGTTGTACTTCCCATTGTAGCACGTGTGTAGCCCAGGTCATAAGGGGCATGATGATTTGACGTCATCCCCACCTTCCTCCGGTTTGTCACCGGCAGTCTCGCTAGAGTGCCCAACTAAATGATGGCAACTAACAATAAGGGTTGCGCTCGTTGCGGGACTTAACCCAACATCTCACGACACGAGCTGAC…
D053	2504	Y	CBA	Firmicutes	Bacilli	Lactobacillales	Enterococcaceae	Enterococcus	1	Enterococcus faecalis strain ZB16110904390	1	0.99	AGTCGAACGCTTCTTTCCTCCCGAGTGCTTGCACTCAATTGGAAAGAGGAGTGGCGGACGGGTGAGTAACACGTGGGTAACCTACCCATCAGAGGGGGATAACACTTGGAAACAGGTGCTAATACCGCATAACAGTTTATGCCGCATGGCATAAGAGTGAAAGGCGCTTTCGGGTGTCGCTGATGGATGGACCCGCGGTGCATTAGCTAGTTGGTGAGGTAACGGCTCACCAAGGCCACGATGCATAGCCGACCTGAGAGGGTGATCGGCCACACTGGGACTGAGACACGGCCCAGACTCCTACGGGAGGCAGCAGTAGGGAATCTTCGGCAATGGACGAAAGTCTGACCGAGCAACGCCGCGTGAGTGAAGAAGGTTTTCGGATCGTAAAACTCTGTT…
D054	2504	Y	CBA	Proteobacteria	Gammaproteobacteria	Enterobacteriales	Enterobacteriaceae	Escherichia-Shigella	1	Proteus mirabilis strain FDAARGOS_67	1	0.99	CTAACACATGCAAGTCGAGCGGTAACAGGAGAAAGCTTGCTTTCTCGCTGACGAGCGGCGGACGGGTGAGTAATGTATGGGGATCTGCCTGATGGAGGGGGATAACTACTGGAAACGGTGGCTAATACCGCATAATGTCTACGGACCAAAGAAGGGGATCTTCGGACCTTGCGCTATCGGATGAACCCATATGGGATTAGCTAGTAGGTGGGGTAAAGGCTCACCTAGGCGACGATCTCTAGCTGGTCTGAGAGGATGATCAGCCACACTGGGACTGAGACACGGCCCAGACTCCTACGGGAGGCAGCAGTGGGGAATATTGCACAATGGGCGCAAGCCTGATGCAGCCATGCCGCGTGTATGAAGAAGGCCTTAGGGTTGTAAAGTACTTTCAGCGGG…
D055	2504	Y	CBA	Proteobacteria	Gammaproteobacteria	Enterobacteriales	Enterobacteriaceae	Enterobacter	0.59	Bacterium NLAE-zl-H160	0.99	0.94	TGTAGCGCCCTCCCGAAGGTTAAGCTACCTACTTCTTTTGCAACCCACTCCCATGGTGTGACGGGCGGTGTGTACAAGGGCCGGGAACGTATTCACCGTAGCATTCTGATCTACGATTACTAGCGATTCCGACTTCATGGAGTCGAGTTGCAGACTCCAATCCGGACTACGACGGACTTTATGAGGTCCGCTTGCTCTCGCGAGGTCGCTTCTCTTTGTATCTGCCATTGTAGCACGTGTGTAGCCCTACTCGTAAGGGCCATGATGACTTGACGTCATCCCCACCTTCCTCCGGTTTATCACCGGCAGTCTCCTTTGAGTTCCCACCATTACGGGTTGGAAACAAAGGAAAAGGGTTGCGCTCGTTGGGGAATTTACCCCAACATTTCACAACACGAG…
D056	2504	Y	CBA	Proteobacteria	Gammaproteobacteria	Enterobacteriales	Enterobacteriaceae	Escherichia-Shigella	1	Proteus mirabilis strain FDAARGOS_67	1	0.98	TGCAAGTCGAGCGGTAACAGGAGAAGCTTGCTTTCTTGCTGACGAGCGGCGGACGGGTGAGTAATGTATGGGGATCTGCCTGATGGAGGGGGATAACTACTGGAAACGGTGGCTAATACCGCATAATGTCTACGGACCAAAGAAGGGGATCTTCGGACCTTGCGCTATCGGATGAGCCCATATGGGATTAGCTAGTAGGTGGGGTAAAGGCTCACCTAGGCGACGATCTCTAGCTGGTCTGAGAGGATGATCAGCCACACTGGGACTGAGACACGGCCCAGACTCCTACGGGAGGCAGCAGTGGGGAATATTGCACAATGGGCGCAAGCCTGATGCAGCCATGCCGCGTGTATGAAGAAGGCCTTAGGGTTGTAAAGTACTTTCAGCGGGGAGGAAGGG…
D057	2504	Y	CBA	Proteobacteria	Gammaproteobacteria	Enterobacteriales	Enterobacteriaceae	Enterobacter	0.83	Bacterium NLAE-zl-C296	0.99	0.92	AGCGCCCTCCCGAAGGTTAAGCTACCTACTTCTTTTGCAACCCACTCCCATGGTGTGACGGGCGGTGTGTACAAGGCCCGGGAACGTATTCACCGTAGCATTCTGATCTACGATTACTAGCGATTCCGACTTCATGGAGTCGAGTTGCAGACTCCAATCCGGACTACGACGGACTTTATGAGGTCCGCTTGCTCTCGCGAGGTCGCTTCTCTTTGTATCTGCCATTGTAGCACGTGTGTAGCCCTACTCGTAAGGGCCATGATGACTTGACGTCATCCCCACCTTCCTCCGGTTTATCACCGGCAGTCTCCTTTGAGTTCCCACCATTACCGGTTGGAAAAAAAGGAAAAGGGTTGCGCTCGTGGCGGAATTTACCCCAACATTTCACAAAACGAGTTA…
D058	2514	Y	BHI	Proteobacteria	Gammaproteobacteria	Enterobacteriales	Enterobacteriaceae	Escherichia-Shigella	1	Proteus mirabilis strain FDAARGOS_67	1	0.98	AGTCGAGCGGTAACAGGAGACAGCTTGCTTTCTTGCTGACGAGCGGCGGACGGGTGAGTAATGTCTGGGGATCTGCCCGATGGAGGGGGATAACTACTGGAAACGGTGGCTAATACCGCATAACGTCTACGGACCAAAGAGGGGGATCTTCGGACCTTGTGCTATCGGATGAGCCCATATGGGATTAGCTAGTAGGTGGGGTAAAGGCTCACCTAGGCGACGATCCCTAGCTGGTCTGAGAGGATGATCAGCCACACTGGGACTGAGACACGGCCCAGACTCCTACGGGAGGCAGCAGTGGGGAATATTGCACAATGGGCGCAAGCCTGATGCAGCCATGCCGCGTGTATGAAGAAGGCCTTAGGGTTGTAAAGTACTTTCAGCGGGGAGGAAGGGGAT…
D059	2514	Y	BHI	Proteobacteria	Gammaproteobacteria	Enterobacteriales	Enterobacteriaceae	Enterobacter	0.76	Bacterium NLAE-zl-C296	0.99	0.86	CCCTCCCGAAGGTTAAGCTACCTACTTCTTTTGCAACCCACTCCCATGGTGTGACGGGCGGTGTGTACAAGGCCCGGGAACGTATTCACCGTGGCATTCTGATCTACGATTACTAGCGATTCCGACTTCATGGAGTCGAGTTGCAGACTCCAATCCGGACTACGACGGACTTTATGAGGTCCGCTTGCTCTCGCGAGGTCGCTTCTCTTTGTATCTGCCATTGTAGCACGTGTGTAGCCCTGGTCGTAAGGGCCATGATGACTTGACGTCATCCCCACCTTCCTCCGGTTTATCACCGGCAGTCTCCTTTGAGTTCCCGCCCGTACCGGTTGGAAACAAAGGAAAAGGGTGGGGTTCGTGGGGGAATTAACCCCACCTTTTCCAAACACAACTTGAGAA…
D060	2514	Y	BHI	Firmicutes	Bacilli	Bacillales	Planococcaceae	Lysinibacillus	1	Lysinibacillus fusiformis strain AFC2 complete sequence	1	0.99	GGCGGCTGGCTCCAAAGGTTACCTCACCGACTTCGGGTGTTACAAACTCTCGTGGTGTGACGGGCGGTGTGTACAAGGCCCGGGAACGTATTCACCGCGGCATGCTGATCCGCGATTACTAGCGATTCCGGCTTCATGTAGGCGAGTTGCAGCCTACAATCCGAACTGAGAACGACTTTATCGGATTAGCTCCCTCTCGCGAGTTGGCAACCGTTTGTATCGTCCATTGTAGCACGTGTGTAGCCCAGGTCATAAGGGGCATGATGATTTGACGTCATCCCCACCTTCCTCCGGTTTGTCACCGGCAGTCACCTTAGAGTGCCCAACTAAATGATGGCAACTAAGATCAAGGGTTGCGCTCGTTGCGGGACTTAACCCAACATCTCACGACACGAGCTG…
D061	2514	Y	BHI	Firmicutes	Bacilli	Bacillales	Planococcaceae	Lysinibacillus	1	Lysinibacillus sp. LS-065	1	0.98	TGCAAGTCGAGCGAACAGAAAAGGAGCTTGCTCCTTTGACGTTAGCGGCGGACGGGTGAGTAACACGTGGGCAACCTACCCTATAGTTTGGGATAACTCCGGGAAACCGGGGCTAATACCGAATAATCTCTTTTACTTCATGGTGAGGGACTGAAAGACGGTTTCGGCTGTCGCTATAGGATGGGCCCGCGGCGCATTATCTAGTTGGTGAGGTAACGGGTCACCAAGGCGACGATGCGTAGCCGACCTGAGAGGGGGATCGGCCACACTGGGACTGAGACACGGCCCACACTCCTACGGGAGGCAGCAGTAGGGAATCTTCCACAATGGGCGAAAGCCTGATGGAGCAACGCCGCGTGAGTGAAGAAGGTTTTCGGATCGTAAAACTCTGTTGTAAGG…
D062	2514	Y	BHI	Proteobacteria	Gammaproteobacteria	Enterobacteriales	Enterobacteriaceae	Citrobacter	0.49	Salmonella enterica subsp. enterica serovar Newport strain CP007216.2	0.97	0.97	TCGAGCGATAACAGGAGGAAGCTTGCTTTTTTGCTGACGAGCGGCGGACGGGTGAGTAATGTCTGGGAATCTGCCTGATGGAGGGGGATAACTACTGGAAACGGTGGCTAATACCGCATAACGTCTTCAGACCAAAGAGGGGGATCTTCGGACCTCTTGCTATCGGATGAGCCCATATGGGATTAGCTAGTAGGTGGGGTAACGGCTCACCTAGGCGACGATCCCTAGCTGGTCTGAGAGGATGATCAGCCACACTGGAACTGAGACACGGCCCAGACTCCTACGGGAGGCAGCAGTGGGGAATATTGCACAATGGGCGCAAGCCTGATGCACCCATGCCGCGTGTATGAAGAAGGCCTTAGGGTTGTAAAGTACTTTCAGCGGGGAGGAAGGGAATAA…
D063	2514	Y	BHI	Proteobacteria	Gammaproteobacteria	Enterobacteriales	Enterobacteriaceae	Escherichia-Shigella	0.41	Shigella dysenteriae strain ATCC 49346	0.99	0.84	TCCCGAAGGTTACCTTACCTACTTCTTTTGCAACCCACTCCCATGGTGTGACGGGCGGTGTGTACAAGGCCCGGGAACGTATTCACCGTAGCATTCTGATCTACGATTACTAGCGATTCCGACTTCATGGAGTCGAGTTGCAGACTCCAATCCGGACTACGACGGACTTTATGAGGTCCGCTTGCTCTCGCGAGGTCGCTTCTCTTTGTATCTGCCATTGTAGCACGTGTGTAGCCCTGGTCGTAAGGGCCATGATGACTTGACGTCATCCCCACCTTCCTCCGGTTTATCACCGGCAGTCTCCTTTGAGTTCCCAGCCGTACGGGTGGGAAAAAAAGAAAAGGGTTGGCGTTCGTGGGGGAATTAACCCCAAATTTTCAAAACAGAATTTAAGAAAGG…
D064	2504	N	BAB	Firmicutes	Bacilli	Lactobacillales	Enterococcaceae	Enterococcus	1	Enterococcus faecalis strain TY1	1	1	GCAAGTCGAACGCTTCTTTCCTCCCGAGTGCTTGCACTCAATTGGAAAGAGGAGTGGCGGACGGGTGAGTAACACGTGGGTAACCTACCCATCAGAGGGGGATAACACTTGGAAACAGGTGCTAATACCGCATAACAGTTTATGCCGCATGGCATAAGAGTGAAAGGCGCTTTCGGGTGTCGCTGATGGATGGACCCGCGGTGCATTAGCTAGTTGGTGAGGTAACGGCTCACCAAGGCCACGATGCATAGCCGACCTGAGAGGGTGATCGGCCACACTGGGACTGAGACACGGCCCAGACTCCTACGGGAGGCAGCAGTAGGGAATCTTCGGCAATGGACGAAAGTCTGACCGAGCAACGCCGCGTGAGTGAAGAAGGTTTTCGGATCGTAAAACTCT…
D065	2504	N	BAB	Firmicutes	Bacilli	Lactobacillales	Enterococcaceae	Enterococcus	1	Enterococcus faecalis strain BR3-5	1	1	TGCAGTCGAACGCTTCTTTCCTCCCGAGTGCTTGCACTCAATTGGAAAGAGGAGTGGCGGACGGGTGAGTAACACGTGGGTAACCTACCCATCAGAGGGGGATAACACTTGGAAACAGGTGCTAATACCGCATAACAGTTTATGCCGCATGGCATAAGAGTGAAAGGCGCTTTCGGGTGTCGCTGATGGATGGACCCGCGGTGCATTAGCTAGTTGGTGAGGTAACGGCTCACCAAGGCCACGATGCATAGCCGACCTGAGAGGGTGATCGGCCACACTGGGACTGAGACACGGCCCAGACTCCTACGGGAGGCAGCAGTAGGGAATCTTCGGCAATGGACGAAAGTCTGACCGAGCAACGCCGCGTGAGTGAAGAAGGTTTTCGGATCGTAAAACTCT…
D066	2504	N	BAB	Firmicutes	Bacilli	Lactobacillales	Enterococcaceae	Enterococcus	1	Enterococcus faecalis strain SN11-6-1	1	1	GGCTGGCTCCAAAAAGGTTACCTCACCGACTTCGGGTGTTACAAACTCTCGTGGTGTGACGGGCGGTGTGTACAAGGCCCGGGAACGTATTCACCGCGGCGTGCTGATCCGCGATTACTAGCGATTCCGGCTTCATGCAGGCGAGTTGCAGCCTGCAATCCGAACTGAGAGAAGCTTTAAGAGATTTGCATGACCTCGCGGTCTAGCGACTCGTTGTACTTCCCATTGTAGCACGTGTGTAGCCCAGGTCATAAGGGGCATGATGATTTGACGTCATCCCCACCTTCCTCCGGTTTGTCACCGGCAGTCTCGCTAGAGTGCCCAACTAAATGATGGCAACTAACAATAAGGGTTGCGCTCGTTGCGGGACTTAACCCAACATCTCACGACACGAGCTGA…
D067	2504	N	BAB	Firmicutes	Bacilli	Lactobacillales	Enterococcaceae	Enterococcus	1	Enterococcus faecalis strain DL1505	1	0.99	CCCTTAGGCGGCTGGCTCCAAAAGGTTACCTCACCGACTTCGGGTGTTACAAACTCTCGTGGTGTGACGGGCGGTGTGTACAAGGCCCGGGAACGTATTCACCGCGGCGTGCTGATCCGCGATTACTAGCGATTCCGGCTTCATGCAGGCGAGTTGCAGCCTGCAATCCGAACTGAGAGAAGCTTTAAGAGATTTGCATGACCTCGCGGTCTAGCGACTCGTTGTACTTCCCATTGTAGCACGTGTGTAGCCCAGGTCATAAGGGGCATGATGATTTGACGTCATCCCCACCTTCCTCCGGTTTGTCACCGGCAGTCTCGCTAGAGTGCCCAACTAAATGATGGCAACTAACAATAAGGGTTGCGCTCGTTGCGGGACTTAACCCAACATCTCACGACA…
D068	2504	N	BAB	Firmicutes	Bacilli	Lactobacillales	Enterococcaceae	Enterococcus	1	Enterococcus faecalis strain DL1505	1	0.99	CCCTTAGGCGGCTGGCTCCAAAAGGTTACCTCACCGACTTCGGGTGTTACAAACTCTCGTGGTGTGACGGGCGGTGTGTACAAGGCCCGGGAACGTATTCACCGCGGCGTGCTGATCCGCGATTACTAGCGATTCCGGCTTCATGCAGGCGAGTTGCAGCCTGCAATCCGAACTGAGAGAAGCTTTAAGAGATTTGCATGACCTCGCGGTCTAGCGACTCGTTGTACTTCCCATTGTAGCACGTGTGTAGCCCAGGTCATAAGGGGCATGATGATTTGACGTCATCCCCACCTTCCTCCGGTTTGTCACCGGCAGTCTCGCTAGAGTGCCCAACTAAATGATGGCAACTAACAATAAGGGTTGCGCTCGTTGCGGGACTTAACCCAACATCTCACGACA…
D069	2504	N	BAB	Firmicutes	Bacilli	Lactobacillales	Enterococcaceae	Enterococcus	1	Enterococcus faecalis strain BR9-7	1	1	AGGCGGCTGGCTCCAAAAGGTTACCTCACCGACTTCGGGTGTTACAAACTCTCGTGGTGTGACGGGCGGTGTGTACAAGGCCCGGGAACGTATTCACCGCGGCGTGCTGATCCGCGATTACTAGCGATTCCGGCTTCATGCAGGCGAGTTGCAGCCTGCAATCCGAACTGAGAGAAGCTTTAAGAGATTTGCATGACCTCGCGGTCTAGCGACTCGTTGTACTTCCCATTGTAGCACGTGTGTAGCCCAGGTCATAAGGGGCATGATGATTTGACGTCATCCCCACCTTCCTCCGGTTTGTCACCGGCAGTCTCGCTAGAGTGCCCAACTAAATGATGGCAACTAACAATAAGGGTTGCGCTCGTTGCGGGACTTAACCCAACATCTCACGACACGAGC…
D070	2504	N	BAB	Firmicutes	Bacilli	Lactobacillales	Enterococcaceae	Enterococcus	1	Enterococcus faecalis strain ZB16110904390	1	1	AGTCGAACGCTTCTTTCCTCCCGAGTGCTTGCACTCAATTGGAAAGAGGAGTGGCGGACGGGTGAGTAACACGTGGGTAACCTACCCATCAGAGGGGGATAACACTTGGAAACAGGTGCTAATACCGCATAACAGTTTATGCCGCATGGCATAAGAGTGAAAGGCGCTTTCGGGTGTCGCTGATGGATGGACCCGCGGTGCATTAGCTAGTTGGTGAGGTAACGGCTCACCAAGGCCACGATGCATAGCCGACCTGAGAGGGTGATCGGCCACACTGGGACTGAGACACGGCCCAGACTCCTACGGGAGGCAGCAGTAGGGAATCTTCGGCAATGGACGAAAGTCTGACCGAGCAACGCCGCGTGAGTGAAGAAGGTTTTCGGATCGTAAAACTCTGTT…
D071	2504	N	BAB	Firmicutes	Bacilli	Lactobacillales	Enterococcaceae	Enterococcus	0.57	Enterococcus faecalis strain 2	1	0.97	TCCAGAAAGGTTACCTCACCGACTTCTTTGGTTACCAATTCTCGTGGTGTGACGGGGGTGGGGTACAAGGCCCGGAAACGTATTCACCGCGGCGTGCTGATCCGCGATTACTAGCGATTCCGGCTTCATGAAGGCGAGTTGCAACCTGCAATCCGAATTGAGAGAAGTTTTAGAAGATTTGTAGGACCTCGCGGGCTACTGACTCGTTGAACTTCCCATTGAACAACGGGGGTACCCCAGGTCATAAGGGGCATGATGATTTGACGTCATCCCCACCTTCCTCCGGTTTGTCACCGGCAGTCTCGCTAGAGTGCCCAACTAAATGATGGCAACTAACAATAAGGGTTGCGCTCGTTGCGGGACTTAACCCAACATCTCACGACACGAGCTGACGACAAC…
D072	2504	N	BAB	Firmicutes	Bacilli	Lactobacillales	Enterococcaceae	Enterococcus	0.55	Enterococcus sp. enrichment culture clone PTmrs14	1	0.92	GTCGAACGCTTCTTTCCTCCCGAGTGCTTGCTCTCTGACGAAAGGAGGAGGGGTGGACGGTGGAGGAACACGTGGCTAACCTACCCATCAGAGGGGGATAACACTTGGAAACAGGTGCTAATACCGCATAACAGTTTATGCCGCATGGCATAAGAGTGAAAGGCGCTTTCGAGTGTCGCTGATGGATGGACCCGCGGTGCATTAGCTAGTTGGTGAGGTCCGGCTCACCATGGCCACGATGGATAATCGACCTGAGAGGGTGATCGGCCACACTGGGACTGAGACACGACCCAGACTCCTACAGGAGGCAGCATGAGGAATCTTCGATGTGGACGAAAGTCTGACCGAGCAAGCCGCGTGAGTGAAGAAGGTTTTCGGATCGTAAAACTCTGTTGTTAG…
D073	2514	N	BAB	Firmicutes	Bacilli	Bacillales	Planococcaceae	Lysinibacillus	0.09	Lysinibacillus sphaericus partial 16S rRNA gene strain BE140	0.98	0.83	TCCAAAAGGGTAACCTACCCACTTCCGGTGGTACCAACTCCCCGGGGGGGGAGGGGGGTGGGGACCAGGGCCGGGAAAGGATTCACCGGGGGATGGTGATCCCGGGATTACAACGGATCCCGGCTTCTGGAAGGGAATTGGAAACCACAATCCGGACTGGAAAGAACTTTATGGAGATAGCTCGCTCTCGCGAGTTGGCTGCCTTTTGTATCTTCCATTGGAACACGTGTGTAACCCAGGTCATAAGGGGCATGATGAATTGACGTCATCCCCACCTTCCTCCGGTTTGTCACCGGCAGTCCCCTTTGAGTGCCCAACTTAATGAAGGGAAATAAAATCAAGGGGTGGGCTTCGTGGGGGAATTAACCCAAAAATTCCAGAAACGAACTTGACAACAAC…
D074	2514	N	BAB	Proteobacteria	Gammaproteobacteria	Vibrionales	Vibrionaceae	Vibrio	0.07	Uncultured bacterium clone ncd899g12c1	0.05	0.92	CGAGCGCTTCTTTCCTCCCGTTGGTTTTTTCTCTTTTGAGAGGAGGAGGGGAGTACGGTGGAGGAACCCTTGCGTATCCTTTCCGATTCTGCGGGTACCGTTGCTAATTACCAATAATCTTCTTTGCTTCATGGACCGGACTTTCAAGACTGAAAGGCTGTTTCTATCCCATATGCCCTTATGGACCCTAGCTAGGTTATCTAGTTCTAGATCAACCATGCCCACCATGGGCAGACAGCATGAGCGAGTTGATAGGCACTGTGAGCATGCTGCGACTGCCACACTCCCCAGACTCCTACAATATTGGAATCTTCCCCCTCTTCCGAAATGCTGATGCCGCTGACCCGCGTGAGTGAAGAAGGTTTTCAAAGTTTTCGGAGTGTAGGAAGGGAAGAACGA…
D075	2504	Y	BAB	Firmicutes	Bacilli	Lactobacillales	Enterococcaceae	Enterococcus	1	Uncultured organism clone ELU0156-T284-S-NIPCRAMgANa_000016	1	1	TACATGCAAGTCGAACGCTTCTTTCCTCCCGAGTGCTTGCACTCAATTGGAAAGAGGAGTGGCGGACGGGTGAGTAACACGTGGGTAACCTACCCATCAGAGGGGGATAACACTTGGAAACAGGTGCTAATACCGCATAACAGTTTATGCCGCATGGCATAAGAGTGAAAGGCGCTTTCGGGTGTCGCTGATGGATGGACCCGCGGTGCATTAGCTAGTTGGTGAGGTAACGGCTCACCAAGGCCACGATGCATAGCCGACCTGAGAGGGTGATCGGCCACACTGGGACTGAGACACGGCCCAGACTCCTACGGGAGGCAGCAGTAGGGAATCTTCGGCAATGGACGAAAGTCTGACCGAGCAACGCCGCGTGAGTGAAGAAGGTTTTCGGATCGTAAA…
D076	2504	Y	BAB	Firmicutes	Bacilli	Lactobacillales	Enterococcaceae	Enterococcus	1	Enterococcus faecalis strain SN11-6-1	1	1	GCGGCTGGCTCCAAAAAGGTTACCTCACCGACTTCGGGTGTTACAAACTCTCGTGGTGTGACGGGCGGTGTGTACAAGGCCCGGGAACGTATTCACCGCGGCGTGCTGATCCGCGATTACTAGCGATTCCGGCTTCATGCAGGCGAGTTGCAGCCTGCAATCCGAACTGAGAGAAGCTTTAAGAGATTTGCATGACCTCGCGGTCTAGCGACTCGTTGTACTTCCCATTGTAGCACGTGTGTAGCCCAGGTCATAAGGGGCATGATGATTTGACGTCATCCCCACCTTCCTCCGGTTTGTCACCGGCAGTCTCGCTAGAGTGCCCAACTAAATGATGGCAACTAACAATAAGGGTTGCGCTCGTTGCGGGACTTAACCCAACATCTCACGACACGAGCT…
D077	2504	Y	BAB	Firmicutes	Bacilli	Lactobacillales	Enterococcaceae	Enterococcus	1	Enterococcus faecalis strain 29a1	1	1	TACATGCAAGTCGAACGCTTCTTTCCTCCCGAGTGCTTGCACTCAATTGGAAAGAGGAGTGGCGGACGGGTGAGTAACACGTGGGTAACCTACCCATCAGAGGGGGATAACACTTGGAAACAGGTGCTAATACCGCATAACAGTTTATGCCGCATGGCATAAGAGTGAAAGGCGCTTTCGGGTGTCGCTGATGGATGGACCCGCGGTGCATTAGCTAGTTGGTGAGGTAACGGCTCACCAAGGCCACGATGCATAGCCGACCTGAGAGGGTGATCGGCCACACTGGGACTGAGACACGGCCCAGACTCCTACGGGAGGCAGCAGTAGGGAATCTTCGGCAATGGACGAAAGTCTGACCGAGCAACGCCGCGTGAGTGAAGAAGGTTTTCGGATCGTAAA…
D078	2504	Y	BAB	Firmicutes	Bacilli	Lactobacillales	Enterococcaceae	Enterococcus	1	Enterococcus faecalis strain TY1	1	1	AGTCGAACGCTTCTTTCCTCCCGAGTGCTTGCACTCAATTGGAAAGAGGAGTGGCGGACGGGTGAGTAACACGTGGGTAACCTACCCATCAGAGGGGGATAACACTTGGAAACAGGTGCTAATACCGCATAACAGTTTATGCCGCATGGCATAAGAGTGAAAGGCGCTTTCGGGTGTCGCTGATGGATGGACCCGCGGTGCATTAGCTAGTTGGTGAGGTAACGGCTCACCAAGGCCACGATGCATAGCCGACCTGAGAGGGTGATCGGCCACACTGGGACTGAGACACGGCCCAGACTCCTACGGGAGGCAGCAGTAGGGAATCTTCGGCAATGGACGAAAGTCTGACCGAGCAACGCCGCGTGAGTGAAGAAGGTTTTCGGATCGTAAAACTCTGTT…
D079	2514	Y	BAB	Firmicutes	Bacilli	Lactobacillales	Lactobacillaceae	Lactobacillus	0.64	Bacillus cereus AH187	1	0.96	AGTCGAGCGAATGGATTAGGAGCTTGCTCTTATGAAGTTAGCGGCGGACGGGTGAGTAACACGTGGGTAACCTGCCCATAAGACTGGGATAACTCCGGGAAACCGGGGCTAATACCGAATAATATTTTGAACCTCATGGTTCAAAATTGAAAGGCGGCTTCGGCTGTCACTTATGGATGGACCCGCGTCGCATTAGCTAGTTGGTGAGGTAACGGCTCACCAAGGCAACGATGCGTAGCCGACCTGAGAGGGTGATCGGCCACACTGGGACTGAGACACGGCCCAGACTCCTACGGGAGGCAGCAGTAGGGAATCTTCCGCAATGGACGAAAGTCTGACGGAGCAACGCCGCGTGAGTGATGAAGGATTTCGGGTCGTAAAACTCTGTTGTTAGGGAAG…
D080	2514	Y	BAB	Firmicutes	Bacilli	Lactobacillales	Enterococcaceae	Enterococcus	0.2	Uncultured Bacillus sp. clone 30	0.97	0.86	GGCTCCAAAAGGGTAACTCCACCGATTTCGGTGGTTACAAACTCTCGGGGGGGGAGGGGGGGGGGGAACAAGGCCCGGAAAGGAATTCACCGGGGAAGGTTGATCCGGGATAACTAGGGATTCCAGCTTCTGGTAGGGGAGTTGAAGCCTACAATCCGAATTGAGAAGGGTTTTATGAGATTAGTTCCACCTCGGGGTCTTGAAGCTCTTTGAACCGTCCATTGAAGAACGGGGGTAGCCCAGGTCAAAAGGGGAATGAGGATTTGACGTCATCCCCACCTTCCTCCGGTTTGTCACCGGAAGCCACCTTAAAGGGCCCAATTAATGGAGGGAAACTAAAATCAGGGGTTGGGTTCGTTGGGGAATTTAACCCAACATCTCACGACACGAGTTGACGAC…
D081	2514	Y	BAB	Firmicutes	Bacilli	Bacillales	Planococcaceae	Lysinibacillus	1	Lysinibacillus xylanilyticus strain Gute33	1	1	TGCAAGTCGAGCGAACAGAAAAGGAGCTTGCTCCTTTGACGTTAGCGGCGGACGGGTGAGTAACACGTGGGCAACCTACCTTATAGTTTGGGATAACTCCGGGAAACCGGGGCTAATACCGAATAATCTCCTTTACTTCATGGTGAAGGACTGAAAGACGGTTTCGGCTGTCGCTATAGGATGGGCCCGCGGCGCATTAGCTAGTTGGTGAGGTAACGGCTCACCAAGGCGACGATGCGTAGCCGACCTGAGAGGGTGATCGGCCACACTGGGACTGAGACACGGCCCAGACTCCTACGGGAGGCAGCAGTAGGGAATCTTCCACAATGGGCGAAAGCCTGATGGAGCAACGCCGCGTGAGTGAAGAAGGTTTTCGGATCGTAAAACTCTGTTGTAAGG…
D082	2511	Y	BAB	Firmicutes	Bacilli	Lactobacillales	Enterococcaceae	Enterococcus	1	Enterococcus gallinarum strain HCD28-3	1	1	AGTCGAACGCTTTTTCTTTCACCGGAGCTTGCTCCACCGAAAGAAAAAGAGTGGCGAACGGGTGAGTAACACGTGGGTAACCTGCCCATCAGAAGGGGATAACACTTGGAAACAGGTGCTAATACCGTATAACACTATTTTCCGCATGGAAGAAAGTTGAAAGGCGCTTTTGCGTCACTGATGGATGGACCCGCGGTGCATTAGCTAGTTGGTGAGGTAACGGCTCACCAAGGCCACGATGCATAGCCGACCTGAGAGGGTGATCGGCCACACTGGGACTGAGACACGGCCCAGACTCCTACGGGAGGCAGCAGTAGGGAATCTTCGGCAATGGACGAAAGTCTGACCGAGCAACGCCGCGTGAGTGAAGAAGGTTTTCGGATCGTAAAACTCTGTTGT…
D083	2511	Y	BAB	Firmicutes	Bacilli	Lactobacillales	Enterococcaceae	Enterococcus	1	Enterococcus gallinarum strain FC6869	1	1	TGGCTCCAAAAAGGTTACCTCACCGACTTCGGGTGTTACAAACTCTCGTGGTGTGACGGGCGGTGTGTACAAGGCCCGGGAACGTATTCACCGCGGCGTGCTGATCCGCGATTACTAGCGATTCCGGCTTCATGTAGGCGAGTTGCAGCCTACAATCCGAACTGAGAGAAGCTTTAAGAGATTAGCTTAGCCTCGCGACTTCGCAACTCGTTGTACTTCCCATTGTAGCACGTGTGTAGCCCAGGTCATAAGGGGCATGATGATTTGACGTCATCCCCACCTTCCTCCGGTTTGTCACCGGCAGTCTCGCTAGAGTGCCCAACTAAATGATGGCAACTAACAATAAGGGTTGCGCTCGTTGCGGGACTTAACCCAACATCTCACGACACGAGCTGACGA…
D084	2511	Y	BAB	Firmicutes	Bacilli	Lactobacillales	Enterococcaceae	Enterococcus	1	Enterococcus gallinarum strain HCD28-5	1	1	AGTCGAACGCTTTTTCTTTCACCGGAGCTTGCTCCACCGAAAGAAAAAGAGTGGCGAACGGGTGAGTAACACGTGGGTAACCTGCCCATCAGAAGGGGATAACACTTGGAAACAGGTGCTAATACCGTATAACACTATTTTCCGCATGGAAGAAAGTTGAAAGGCGCTTTTGCGTCACTGATGGATGGACCCGCGGTGCATTAGCTAGTTGGTGAGGTAACGGCTCACCAAGGCCACGATGCATAGCCGACCTGAGAGGGTGATCGGCCACACTGGGACTGAGACACGGCCCAGACTCCTACGGGAGGCAGCAGTAGGGAATCTTCGGCAATGGACGAAAGTCTGACCGAGCAACGCCGCGTGAGTGAAGAAGGTTTTCGGATCGTAAAACTCTGTTGT…
D085	2511	Y	BAB	Firmicutes	Bacilli	Bacillales	Planococcaceae	Lysinibacillus	1	Lysinibacillus sp. enrichment culture clone MJJ-11	1	1	TGCAGTCGAGCGAACAGAAAAGGAGCTTGCTCCTTTGACGTTAGCGGCGGACGGGTGAGTAACACGTGGGCAACCTACCCTATAGTTTGGGATAACTCCGGGAAACCGGGGCTAATACCGAATAATCTCCTTTACTTCATGGTGAAGGACTGAAAGACGGTTTCGGCTGTCGCTATAGGATGGGCCCGCGGCGCATTAGCTAGTTGGTGAGGTAACGGCTCACCAAGGCGACGATGCGTAGCCGACCTGAGAGGGTGATCGGCCACACTGGGACTGAGACACGGCCCAGACTCCTACGGGAGGCAGCAGTAGGGAATCTTCCACAATGGGCGAAAGCCTGATGGAGCAACGCCGCGTGAGTGAAGAAGGTTTTCGGATCGTAAAACTCTGTTGTAAGGG…
D086	2511	Y	BAB	Firmicutes	Bacilli	Bacillales	Planococcaceae	Lysinibacillus	1	Lysinibacillus sp. strain Firmi-27	1	1	TTCGGCGGCTGGCTCCAAAAGGTTACCTCACCGACTTCGGGTGTTACAAACTCTCGTGGTGTGACGGGCGGTGTGTACAAGGCCCGGGAACGTATTCACCGCGGCATGCTGATCCGCGATTACTAGCGATTCCGGCTTCATGTAGGCGAGTTGCAGCCTACAATCCGAACTGAGAACGACTTTATCGGATTAGCTCCCTCTCGCGAGTTGGCAACCGTTTGTATCGTCCATTGTAGCACGTGTGTAGCCCAGGTCATAAGGGGCATGATGATTTGACGTCATCCCCACCTTCCTCCGGTTTGTCACCGGCAGTCACCTTAGAGTGCCCAACTAAATGATGGCAACTAAGATCAAGGGTTGCGCTCGTTGCGGGACTTAACCCAACATCTCACGACACGA…
D087	2511	Y	BAB	Firmicutes	Bacilli	Bacillales	Planococcaceae	Lysinibacillus	1	Lysinibacillus sp. strain P5	1	1	TGCAGTCGAGCGAACAGAAAAGGAGCTTGCTCCTTTGACGTTAGCGGCGGACGGGTGAGTAACACGTGGGCAACCTACCCTATAGTTTGGGATAACTCCGGGAAACCGGGGCTAATACCGAATAATCTCCTTTACTTCATGGTGAAGGACTGAAAGACGGTTTCGGCTGTCGCTATAGGATGGGCCCGCGGCGCATTAGCTAGTTGGTGAGGTAACGGCTCACCAAGGCGACGATGCGTAGCCGACCTGAGAGGGTGATCGGCCACACTGGGACTGAGACACGGCCCAGACTCCTACGGGAGGCAGCAGTAGGGAATCTTCCACAATGGGCGAAAGCCTGATGGAGCAACGCCGCGTGAGTGAAGAAGGTTTTCGGATCGTAAAACTCTGTTGTAAGGG…
D088	2508	N	BAB	Proteobacteria	Gammaproteobacteria	Enterobacteriales	Enterobacteriaceae	Enterobacter	0.94	Bacterium NLAE-zl-H160	1	0.92	GCGCCCTCCCGAAGGTTAAGCTACCTACTTCTTTTGCAACCCACTCCCATGGTGTGACGGGCGGTGTGTACAAGGGCCGGGAACGTATTCACCGTAGCATTCTGATCTACGATTACTAACGATTCCGACTTCATGGAGTCGAGTTGCAGACTCCAATCCGGACTACGACGAACTTTATGAAGTCCGCTTGCTCTCGCGAGGTCGCTTCTCTTTGTATCTGCCATTGGAGCACGTGTGTAGCCCTACTCGTAAGGGCCATGATGACTTGACGTCATCCCCACCTTCCTCCGGTTTATCACCGGCAGTCTCCTTTGAGTTCCCACCATTACCTGTTGGAAAAAAAGGAAAAGGGTTGCGCTCGTTGGGGAATTTAACCCAACATTTCAAAACACAAGTGAA…
D089	2508	N	BAB	Proteobacteria	Gammaproteobacteria	Enterobacteriales	Enterobacteriaceae	Citrobacter	0.72	Proteus mirabilis strain HH141	0.99	0.94	TGCAAGTCGAGCGGTAACAGGAGAAAGCTTGCTTTCTCGCTGACGAGAGGCGGACGGGTGAGTAATGTATGGGAATCTGCCCGATGGAGGGGGATAACTACTGGAAACGGGGGCTAATACCGCATAACGTCTAAAGACCATAGAAGGGGATCTTCAGACCTTGCACTATCTGATGAGCCCATATGGGATTAGCTAGTAGGGGGGGTAATGGCTCACCTAGGCGACGATCTCTAGCTGGTCTGAGAGGATGATCACCCACACTGGGACTGAGACACGGGCCACACTCCTACGGGAGGCAGCACTGGGGAATATTGCACAATGGGCGCAAGCCTGATGCACCCATGCCGCGTGTATGAAGAACGCCTTAGGGTTGTAAAGTACTTTCTCCGGGGAGGAAGG…
D090	2508	N	BAB	Firmicutes	Bacilli	Lactobacillales	Lactobacillaceae	Lactobacillus	1	Bacillus toyonensis strain FJAT-46839	1	1	GCAAGTCGAGCGAATGGATTGAGAGCTTGCTCTCATGAAGTTAGCGGCGGACGGGTGAGTAACACGTGGGTAACCTGCCCATAAGACTGGGATAACTCCGGGAAACCGGGGCTAATACCGGATAACATTTTGAACTGCATGGTTCGAAATTGAAAGGCGGCTTCGGCTGTCACTTATGGATGGACCCGCGTCGCATTAGCTAGTTGGTGAGGTAACGGCTCACCAAGGCAACGATGCGTAGCCGACCTGAGAGGGTGATCGGCCACACTGGGACTGAGACACGGCCCAGACTCCTACGGGAGGCAGCAGTAGGGAATCTTCCGCAATGGACGAAAGTCTGACGGAGCAACGCCGCGTGAGTGATGAAGGCTTTCGGGTCGTAAAACTCTGTTGTTAGGG…
D091	2508	Y	BHI	Firmicutes	Bacilli	Lactobacillales	Lactobacillaceae	Lactobacillus	1	Bacillus toyonensis strain FJAT-46839	1	1	GTCGAGCGAATGGATTGAGAGCTTGCTCTCATGAAGTTAGCGGCGGACGGGTGAGTAACACGTGGGTAACCTGCCCATAAGACTGGGATAACTCCGGGAAACCGGGGCTAATACCGGATAACATTTTGAACTGCATGGTTCGAAATTGAAAGGCGGCTTCGGCTGTCACTTATGGATGGACCCGCGTCGCATTAGCTAGTTGGTGAGGTAACGGCTCACCAAGGCAACGATGCGTAGCCGACCTGAGAGGGTGATCGGCCACACTGGGACTGAGACACGGCCCAGACTCCTACGGGAGGCAGCAGTAGGGAATCTTCCGCAATGGACGAAAGTCTGACGGAGCAACGCCGCGTGAGTGATGAAGGCTTTCGGGTCGTAAAACTCTGTTGTTAGGGAAGA…
D092	2508	Y	BHI	Actinobacteria	Actinobacteria	Actinomycetales	Corynebacteriaceae	Corynebacterium	0.59	Corynebacterium testudinoris strain DSM 44614	0.99	0.89	CTCCACAAGGATTGGGTCTCTGCTCTTCGGGTGTTACCAACTTTCATGACGTGACGGGCGGTGTGTACAAGGCCCGGGAACGTATTCACCGCAGCGTTGCTGATCTGCGATTACTAGCGACTCCGACTTCATGGGGTCGAGTTGCAGACCCCAATCCAATATGAGGCCGGCTTTCAGAGATTATTGCACTCTTACGGGCTGTGACCTCGGTGCACCGCCCAGTGGAACGTGTGTGAACCCGTGCACATAGGGCGTGAGAAGATGTCACGTCATCCCCACCTTCCTCCGAGTTGACCCCGGGAGTCCTTCATGATCCCCCACCATAATGTGCTGGCAACATAAGACAAGGGTTGCGCTCGTTGCGGGACTTAACCCAACATCTCACGACACGAGCTGACG…
D093	2508	Y	BHI	Proteobacteria	Gammaproteobacteria	Pseudomonadales	Moraxellaceae	Psychrobacter	0.02	Psychrobacter sp. strain P6E-3	0.3	0.75	TGCAAGTCGAGCGGAAACGACCTGCTTGCAGGTTACTCGATTGAGGGACGGGTGAGTGAGCGTGGGTGAGCTGCCTTGTCCTTCGGGGGGATCTTTCGAAAGTGGTCGTATTACCACATATAACCATCTTTTAGAGAGGGGGGTGGAAAGTTTTTTCCCTCTCTTAAATGACCCTACCCATTAATTAACTAGATAGTAGGGGAAAGGACGGCTCTCCTGACGAACTGTCTCTAGCTGGACAGAAAGGACGACCACACCGGGACTGAATGACGCCCCGACTCCACTCCTACGCAAGGAAGGAGAATATAATGGAAAGGAATGAAAACCCTGATCCATCCATGCCCGGCGCGGATGAAGGGACTGCCTTTGGAATCCCACTTTCTTTAGGGAGGAAGACTC…
D094	2508	Y	BHI	Firmicutes	Bacilli	Lactobacillales	Lactobacillaceae	Lactobacillus	1	Bacillus thuringiensis strain L33	1	1	TGCAGTCGAGCGAATGGATTGAGAGCTTGCTCTCATGAAGTTAGCGGCGGACGGGTGAGTAACACGTGGGTAACCTGCCCATAAGACTGGGATAACTCCGGGAAACCGGGGCTAATACCGGATAACATTTTGAACTGCATGGTTCGAAATTGAAAGGCGGCTTCGGCTGTCACTTATGGATGGACCCGCGTCGCATTAGCTAGTTGGTGAGGTAACGGCTCACCAAGGCAACGATGCGTAGCCGACCTGAGAGGGTGATCGGCCACACTGGGACTGAGACACGGCCCAGACTCCTACGGGAGGCAGCAGTAGGGAATCTTCCGCAATGGACGAAAGTCTGACGGAGCAACGCCGCGTGAGTGATGAAGGCTTTCGGGTCGTAAAACTCTGTTGTTAGGG…
D095	2508	Y	BHI	Actinobacteria	Actinobacteria	Actinomycetales	Corynebacteriaceae	Corynebacterium	0.4	Corynebacterium testudinoris strain DSM 44614	1	0.92	CCCTCCACAAGGGTTGGCTACCTGCTTTTCTTTGTGTTACCCTCTTTCGTGACGTGACGGGCGGTGTGTACAAGGCCCGGGAACGTATTCACCGCACCGTTGCTGATCTGCGATTACTAGATTCTCACTCTTCATGGGGTCGAGTTGCACTCCCCAATCCAATCTGAGGCCGGCTTTCAGCGATTATTGCTCCCTTACGGTCTGTTCTCTTTGTGTACCGCCCATTGTAACATGTGTGAACCCCTGCACATAGGGCGCAAGAAGATTTGACCTCCTCCCCCTCTTCCTCCGATATGACCCCGGGTCTCTCTCGAGATCCCCCACCATAACGTGCTGGCAACATAAGACAAGGGTTGCGCTCGTTGCGGGACTTAACCCAACATCTCACGACACGAGCTG…
D096	2508	Y	BHI	Actinobacteria	Actinobacteria	Actinomycetales	Corynebacteriaceae	Corynebacterium	0.36	Corynebacterium testudinoris strain DSM 44614	0.97	0.84	TGCAAGTCGAACGGAAAGGCCCTGCTTGCAGGTTACTCGATTGGCGAAGGGGTGAGTAACACGTGGGTGATCTGCCTCGCACTTCGGGATAAGCTTGGGAAAGTGGGTCTAATACCGGATATAACCTTCCTTTAGTGTGGGGGGTGGAAAGTTTTTTCCCTACGAGATGAGCCCGCGCCCCTATCAGCTTGTTGGTGGGGTAATGGCCTACCTCGCGTCGACGGGATCCCTGCCTGAGAGGGTGGACGGACCCATTGCGATTGAAATACGGCCCAGACTCCTATCCTAGGCAGCAGTGGGGAGTATTGCACAATGGGCGGAAGCCTGATGTGATGACGCCATGTGGGGGATGACGGCCTTCGCTTTGGATTCCTCTTTCCTTTCGGACGAAACCATCCT…
D097	2511	N	BAB	Proteobacteria	Gammaproteobacteria	Enterobacteriales	Morganellaceae	Morganella	0.11	Uncultured bacterium clone rRNA347	0.99	0.85	GCGCCCTCCGAAGGGTAACCTACCTACTTCTTTTGGACCCACTCCCATGGTGTGACGGGCGGTGGGTACCAGGGCCGGGAACGTATTCACCGGAGCATTCTGATCCCGATTACTAACGATTCCCACTTCATGGAGTCGAGTTGCAAACTCCCATCCGGACTAGAAAGAACTTTATGAAGACCGCTTGATCTCCCGAGGTCCCTTCTCTTTGGATCTTCCATTGGAACACGTGGGGAACCCTACTCCATAGGGCCATGATGACTTGACGTCATCCCCACCTTCCTCCGGTTTATCACCGGCAGTCTCCTTTGAGTTCCCCCCATTACTGATTTGGACTAAAGGATAAGGGTTGCGCTCGTTGCGGACTTTTACCCCAATCTTTCGACACGAACTGAACAA…
D098	2511	N	BAB	Proteobacteria	Gammaproteobacteria	Enterobacteriales	Enterobacteriaceae	Escherichia-Shigella	0.78	Proteus mirabilis strain AMJ131	0.96	0.82	TGCAAGTCGAACGCTTTTTCTTTCCCGTTGCTTGCTCGCTGACGAGAGGCGAACGGGTGAGGAATGTATGGGAAGCTGCCCGACTGAGGGGGATAACTACTGAAAACGGGGGCTAATACCGCATAACGTCATAAGACCATTTTCCGGGTGCTTCAGACCTTGAAGGATCTTATGAGCCCATATGGGATGAACTCGCAGGGGGGGTAATGGCTCACCTAGGCGACGATCTCTAGCTGCTCTGAGAGGATGATCACTCACACTGGGACTGAGACCCGTGCCACACTCCTACGGGAGGCACTCCTGCGGAATATTGCACAATGGGCGCTTCCCTGATGCACCCATGCCTGACGTATGAACAACGCCTTAGGGTTGAAAAGTACTTTCTCCGGGGAGTATGGT…
D099	2511	N	BAB	Proteobacteria	Gammaproteobacteria	Enterobacteriales	Enterobacteriaceae	Escherichia-Shigella	1	Proteus mirabilis strain 40X2	1	0.99	TGCAAGTCGAGCGGTAACAGGAGAAAGCTTGCTTTCTTGCTGACGAGCGGCGGACGGGTGAGTAATGTATGGGGATCTGCCCGATGGAGGGGGATAACTACTGGAAACGGTGGCTAATACCGCATAACGTCTACGGACCAAAGAAGGGGATCTTCGGACCTTGCACTATCGGATGAGCCCATATGGGATTAGCTAGTAGGTGGGGTAAAGGCTCACCTAGGCGACGATCTCTAGCTGGTCTGAGAGGATGATCAGCCACACTGGGACTGAGACACGGCCCAGACTCCTACGGGAGGCAGCAGTGGGGAATATTGCACAATGGGCGCAAGCCTGATGCAGCCATGCCGCGTGTATGAAGAAGGCCTTAGGGTTGTAAAGTACTTTCAGCGGGGAGGAAGG…
D100	2511	N	BAB	Proteobacteria	Gammaproteobacteria	Enterobacteriales	Enterobacteriaceae	Enterobacter	0.82	Bacterium NLAE-zl-H160	0.99	0.94	GCGCCCTCCCGAAGGTTAAGCTACCTACTTCTTTTGCAACCCACTCCCATGGTGTGACGGGCGGTGTGTACAAGGCCCGGGAACGTATTCACCGTAGCATTCTGATCTACGATTACTAGCGATTCCGACTTCATGGAGTCGAGTTGCAGACTCCAATCCGGACTACGACGGACTTTATGAGGTCCGCTTGCTCTCGCGAGGTCGCTTCTCTTTGTATCTGCCATTGTAGCACGTGTGTAGCCCTACTCGTAAGGGCCATGATGACTTGACGTCATCCCCACCTTCCTCCGGTTTATCACCGGCAGTCTCCTTTGAGTTCCCACCATTACGGGTTGGAAAAAAAGGAAAAGGGTTGCGTTCGTTGGGGAATTTAACCCAAAATTTCACAACACGAGTTGA…
D101	2511	N	BAB	Proteobacteria	Gammaproteobacteria	Enterobacteriales	Enterobacteriaceae	Klebsiella	1	Proteus sp. BUR10	1	0.98	CTACACATGCAGTCGAGCGGTAACAGGAGAAAGCTTGCTTTCTTGCTGACGAGCGGCGGACGGGTGAGTAATGTATGGGGATCTGCCCGATGGAGGGGGATAACTACTGGAAACGGTGGCTAATACCGCATAACGTCTAAGGACCAAAGAAGGGGATCTTCGGACCTTGTACTATCGGATGAGCCCATATGGGATTAGCTAGTAGGTGGGGTAAAGGCTCACCTAGGCGACGATCTCTAGCTGGTCTGAGAGGATGATCAGCCACACTGGGACTGAGACACGGGCCAGACTCCTACGGGAGGCAGCAGTGGGGAATATTGCACAATGGGCGCAAGCCTGATGCAGCCATGCCGCGTGTATGAAGAAGGCCTTAGGGTTGTAAAGTACTTTCAGCGGGGA…
D102	2511	N	BAB	Proteobacteria	Gammaproteobacteria	Enterobacteriales	Enterobacteriaceae	Enterobacter	0.8	Bacterium NLAE-zl-H266	0.97	0.91	AGCGCCCTCCCGAAGGTTAAGCTACCTACTTCTTTTGCAACCCACTCCCATGGTGTGACGGGCGGTGTGTACAAGGGCCGGGAACGTATTCACCGTAGCATTCTGATCTACGATTACTAGCGATTCCGACTTCATGGAGTCGAGTTGCAGACTCCAATCCGGACTACGACGGACTTTATGAGGTCCGCTTGCTCTCGCGAGGTCGCTTCTCTTTGTATCTGCCATTGTAGCACGTGTGTAGCCCTACTCGTAAGGGCCATGATGACTTGACGTCATCCCCACCTTCCTCCGGTTTATCACCGGCAGTCTCCTTTGAGTTCCCACCATTACCGGTTGGAAAAAAAGGAAAAGGGTTGGGTTCGTTGGGGAATTTAACCCAAAATTTCAAAAAAGGAGTTG…
D103	2511	N	BAB	Proteobacteria	Gammaproteobacteria	Enterobacteriales	Enterobacteriaceae	Escherichia-Shigella	1	Proteus mirabilis strain FDAARGOS_67	1	0.99	ACACATGCAAGTCGAGCGGTAACAGGAGACAGCTTGCTTTTTCGCTGACGAGCGGCGGACGGGTGAGTAATGTATGGGGATCTGCCCGATGGAGGGGGATAACTACTGGAAACGGTGGCTAATACCGCATAATGTCTACGGACCAAAGAAGGGGATCTTCGGACCTTGCGCTATCGGATGAGCCCATATGGGATTAGCTAGTAGGTGGGGTAAAGGCTCACCTAGGCGACGATCTCTAGCTGGTCTGAGAGGATGATCAGCCACACTGGGACTGAGACACGGCCCAGACTCCTACGGGAGGCAGCAGTGGGGAATATTGCACAATGGGCGCAAGCCTGATGCAGCCATGCCGCGTGTATGAAGAAGGCCTTAGGGTTGTAAAGTACTTTCAGCGGGGAG…
D104	2511	N	BAB	Proteobacteria	Gammaproteobacteria	Enterobacteriales	Enterobacteriaceae	Escherichia-Shigella	0.98	Proteus mirabilis isolate GN2	1	0.92	AGCGCCCTCCCGAAGGTTAAGCTACCTACTTCTTTTGCAACCCACTCCCATGGTGTGACGGGCGGTGTGTACAAGGCCCGGGAACGTATTCACCGTGGCATTCTGATCTACGATTACTAGCGATTCCGACTTCATGGAGTCGAGTTGCAGACTCCAATCCGGACTACGACGGACTTTATGAGTTCCGCTTGCTCTCGCGAGGTCGCTTCTCTTTGTATCTGCCATTGTAGCACGTGTGTAGCCCTGCTCGTAAGGGCCATGATGACTTGACGTCATCCCCACCTTCCTCCGGTTTATCACCGGCAGTCTCCTTTGAGTTCCCACCATTACCTGTTGGAAACAAAGGATAAGGGTTGCGTTCGTTGGGGAATTTAACCCAACATTTCACAACACGAGTTG…
D105	2504	N	CBA	Firmicutes	Bacilli	Lactobacillales	Enterococcaceae	Enterococcus	1	Enterococcus faecalis strain TY1	1	1	TGCAAGTCGAACGCTTCTTTCCTCCCGAGTGCTTGCACTCAATTGGAAAGAGGAGTGGCGGACGGGTGAGTAACACGTGGGTAACCTACCCATCAGAGGGGGATAACACTTGGAAACAGGTGCTAATACCGCATAACAGTTTATGCCGCATGGCATAAGAGTGAAAGGCGCTTTCGGGTGTCGCTGATGGATGGACCCGCGGTGCATTAGCTAGTTGGTGAGGTAACGGCTCACCAAGGCCACGATGCATAGCCGACCTGAGAGGGTGATCGGCCACACTGGGACTGAGACACGGCCCAGACTCCTACGGGAGGCAGCAGTAGGGAATCTTCGGCAATGGACGAAAGTCTGACCGAGCAACGCCGCGTGAGTGAAGAAGGTTTTCGGATCGTAAAACTC…
D106	2504	N	CBA	Firmicutes	Bacilli	Lactobacillales	Enterococcaceae	Enterococcus	1	Bacterium strain IMAU11917	1	1	GGCTGGCTCCAAAAAGGTTACCTCACCGACTTCGGGTGTTACAAACTCTCGTGGTGTGACGGGCGGTGTGTACAAGGCCCGGGAACGTATTCACCGCGGCGTGCTGATCCGCGATTACTAGCGATTCCGGCTTCATGCAGGCGAGTTGCAGCCTGCAATCCGAACTGAGAGAAGCTTTAAGAGATTTGCATGACCTCGCGGTCTAGCGACTCGTTGTACTTCCCATTGTAGCACGTGTGTAGCCCAGGTCATAAGGGGCATGATGATTTGACGTCATCCCCACCTTCCTCCGGTTTGTCACCGGCAGTCTCGCTAGAGTGCCCAACTAAATGATGGCAACTAACAATAAGGGTTGCGCTCGTTGCGGGACTTAACCCAACATCTCACGACACGAGCTGA…
D107	2504	N	CBA	Firmicutes	Bacilli	Lactobacillales	Enterococcaceae	Enterococcus	1	Enterococcus faecalis strain B6.1.1A	1	1	TGCAAGTCGAACGCTTCTTTCCTCCCGAGTGCTTGCACTCAATTGGAAAGAGGAGTGGCGGACGGGTGAGTAACACGTGGGTAACCTACCCATCAGAGGGGGATAACACTTGGAAACAGGTGCTAATACCGCATAACAGTTTATGCCGCATGGCATAAGAGTGAAAGGCGCTTTCGGGTGTCGCTGATGGATGGACCCGCGGTGCATTAGCTAGTTGGTGAGGTAACGGCTCACCAAGGCCACGATGCATAGCCGACCTGAGAGGGTGATCGGCCACACTGGGACTGAGACACGGCCCAGACTCCTACGGGAGGCAGCAGTAGGGAATCTTCGGCAATGGACGAAAGTCTGACCGAGCAACGCCGCGTGAGTGAAGAAGGTTTTCGGATCGTAAAACTC…
D108	2504	N	CBA	Firmicutes	Bacilli	Lactobacillales	Enterococcaceae	Enterococcus	0.57	Enterococcus faecalis strain EQ56	1	0.9	GGCTGCCTCCAGAAGGGTTACCTCACCAATTTTTTTGGTTACCAATTCCATGTGTGGGACGGGGGGTGGGGTAAGGGCCCGGAAACGAATTCACCGCGGATTGCTGATCCGCGATTACTACGGATCCCACTTTCATGAAGGGGAGTTGCAACCTGCAATCCGAATTGAGAGAAGTTTAAGAAGATTTGTAGGACCTCGGGGGCTACTGCTTTTTGGAACTTCCCATGGAACAAGGGGGGAACCCCAGGCCATAGGGGCAAGATGAATTTGACGTCTCCCCCCCCTTCTCCCGGTTATCCACCGGAAGCTCCTTTGAGTTGCCCAAATAACTGATGGCAACTAACAATAAGGGTGCGCTCGTTGCGGGACTTAACCCAACATCTCACGACACGAGCTGAC…
D109	2504	N	CBA	Firmicutes	Bacilli	Lactobacillales	Enterococcaceae	Enterococcus	0.42	Enterococcus faecalis strain DMF4	0.94	0.77	TGCAAGTCGAACGCTTCTTTCCTCCCGAGTGCTTGCTCTCTGACGAAAGGAGGACGGGTGAACGGTGGAGTAACACGTGGCTGACCTACCCATCAGAGGGGTATAACACTTGGATCATACCGCTTATACCGCATAACACCATTATGCCGGATCTTCAAGACTGAAAGGCGCTTATGAACCCATATTGGATTATGGACCCGGTGTGCATTCGGCTCACCTAGAGGTCGATCTCTCCATGGTCTGAGAGGATGATCAGCCTGATGGGGTGATCACACACACTGGGACTGAGACACGAGGCCAGACTCCTACAATATTGCACAATGGGGAATCTTCTGATGTGGACGAAAGTCTGACCGAAGACGCCTTGTGATTGAAGAAGGCTTTCGGATCGGAGGATCT…
D110	2504	N	CBA	Firmicutes	Bacilli	Lactobacillales	Enterococcaceae	Enterococcus	0.52	Enterococcus faecalis strain EQ56	0.98	0.89	ACTTAGGAAGGCTGCCTCCGAAGGGTTACCTCACCAATTTCTTTGGTTACCAATTCCATGTGGGGGGAGGGGGGGGGGGCCAGGGCCCGGAAACGATTCAACCGAGGCGTGCTGATCACCGAACTAAGGGATTCCACTTTCATGAAGGGAAGTTGCAACCTGCATCCGGAATTGAGAGAAGTTTATGAAGATTGGTTGGACCTCGGAGGTTGCTGATCTTTGGAACTTCCCATTGAACAAGGGGGGAACCCCAGGCCATAGGGGGAATGATGATTTGACGTCTCCCCCCCCTTCCTCCGGTTATCCACCGGAAGCTCCTTTAGAGTGCCCAAATTATGATGGCAACTAACAATAAGGGTTGCGCTCGTTGCGGGACTTAACCCAACATCTCACGACACG…
D111	2504	N	CBA	Proteobacteria	Gammaproteobacteria	Enterobacteriales	Enterobacteriaceae	Klebsiella	0.78	Proteus sp. 118_5	0.87	0.77	TGCAAGTCGAACGCTTCATTCCTCCCGCTTGCTTGCTCTCTGACGAGAGGAGGACGGGTGAGTAGTGGATGGGGATCTGCCTGATGGAGGGGGAGACTACTGGAAACGGTGGCTAATACCGCATAACGTCTTAAGACCAAAGAAGGGGATCTTCAAGACTGAAACTATCTTATGAACCCATATGGGATTATGGACCCGGTGGGGTTCGGCTCACCTAGAGGACGATCTCTACATGGTCTGAGAGGATGATCAACACACTGGGGACTGAGACACGGCCCAGACTCCTACGGGAGGCCAGACTCCTAGAATATTGCACAATGGGGAATCTTCTGATGTGGACATGCCTCTGACATGAAGAAGGCTTAGAGTTAAAAAGGCTTTCAGATCGGAGGATCTGGA…
D112	2504	N	CBA	Proteobacteria	Gammaproteobacteria	Enterobacteriales	Enterobacteriaceae	Escherichia-Shigella	0.93	Proteus mirabilis strain FDAARGOS_67	1	0.98	TGCAAGTCGAGCGGTAACAGGATACCGCTTGCTTTCTTGCTGACGAGCGGCGGACGGGTGAGTAATGTATGGGGATCTGCCTGATGGAGGGGGATAACTACTGGAAACGGTGGCTAATACCGCATAATGTCTACGGACCAAAGAAGGGGATCTTCGGACCTTGTGCTATCGGATGAACCCATATGGGATTAGCTAGTAGGTGGGGTAAAGGCTCACCTAGGCGACGATCTCTAGCTGGTCTGAGAGGATGATCAGCCACACTGGAACTGAGACACGGCCCAGACTCCTACGGGAGGCAGCAGTGGGGAATATTGCACAATGGGCGCAAGCCTGATGCAGCCATGCCGCGTGTATGAAGAAGGCCTTAGGGTTGTAAAGTACTTTCAGCGGGGAGGAAGG…
D113	2504	N	CBA	Proteobacteria	Gammaproteobacteria	Enterobacteriales	Enterobacteriaceae	Citrobacter	0.85	Proteus mirabilis strain LCX7	1	0.91	TCCCGAAGGGTAAGCTACCTACTTCTTTTGCAACCCACTCCCATGGTGTGACGGGCGGTGTGTACAAGGGCCGGGAACGTATTCACCGGGGCATTCTGATCTACGATTACTAACGATTCCGACTTCATGGAGTCGAGTTGCAGACTCCAATCCGGACTACGACGAACTTTATGAAGTCCGCTTGCTCTCGCGAGGTCGCTTCTCTTTGTATCTGCCATTGGAACACGTGTGTAGCCCTACTCGTAAGGGCCATGATGACTTGACGTCATCCCCACCTTCCTCCGGTTTATCACCGGCAGTCTCCTTTGAGTTCCCACCATTACCTGTTGGAAACAAAGGAAAAGGGTTGCGTTCGTTGCGGAATTTAACCCAACATTTCAAAAAACGAGTTGACGACGG…
D114	2511	N	BHI	Firmicutes	Bacilli	Bacillales	Staphylococcaceae	Staphylococcus	0.48	Staphylococcus pettenkoferi strain FDAARGOS_288	1	0.95	TCCCAAAGTGGTTGCTCCACCGTCTTCGGGTGCTACAAACTCTCGTGGTGGGACGGGCGGTGTGAACAAGACCCGGGAACGTATTCACCGTATTATGCTGATCTACGATTACTAACGATTCCTGCTTCATGTAGACGAGTTGAATACTACAATCCGAACTGAGAACATTTTTATGGGATTTGGTTGACCTCGGGGTTTATCTGTCCTTTGTATTGTCCATTGTACGACGGGTGTACTCCACATCATAAGGGGGATGATGATTTGACGTCCTCCCCACCTTCCTCCGGTTTGTCACCGGCATCCAACTTATAGTGCCCAACTGAATGATGGAAACTAAGCTTAGGGGTTGCGCTCGTTGGGGGACTTAACCCAACATCTCACGACACGAGCTGACGACAA…
D115	2511	N	BHI	Firmicutes	Bacilli	Bacillales	Staphylococcaceae	Staphylococcus	0.99	Staphylococcus pettenkoferi strain FDAARGOS_288	1	0.97	CGAGCGACAGACGGGGAGCTTGCTCCCCCGACGTTAGCGGGGGACGGGTGAGTAACACGTGGGTAACCTACCTATAAGACTGGAATAACTCCGGGAAACCGGGGCTAATGCCGGATAACATGTTGGACCGCATGGTCCTACAGCGAAAGACGGTCTTGCTGTCACTTATACATGGACCCGCGCCGTATTAGCTAGTTGGTAAGGTAACGGCTTACCAAGGCAACGATACGTAGCCGACCTGAGAGGGTGATCGTGCACACTGGAACTGAGACACGGTCCAGACTCCTACGGGAGGGAGCAATAGGGAATCTTCCGCAATGGGCGAAAGCCTGACGGAGCAACGCCGCGTGAGTGATGAAGGCCTTCGGGTCGTAAAACTCTGTTATTAGGGAAGAACAA…
D116	2511	N	BHI	Proteobacteria	Gammaproteobacteria	Enterobacteriales	Enterobacteriaceae	Escherichia-Shigella	1	Proteus mirabilis strain 40X2	1	0.99	TGCAAGTCGAGCGGTAACAGGAGAAAGCTTGCTTTCTTGCTGACGAGCGGCGGACGGGTGAGTAATGTATGGGGATCTGCCCGATGGAGGGGGATAACTACTGGAAACGGTGGCTAATACCGCATAACGTCTACGGACCAAAGAAGGGGATCTTCGGACCTTGCACTATCGGATGAGCCCATATGGGATTAGCTAGTAGGTGGGGTAAAGGCTCACCTAGGCGACGATCTCTAGCTGGTCTGAGAGGATGATCAGCCACACTGGGACTGAGACACGGCCCAGACTCCTACGGGAGGCAGCAGTGGGGAATATTGCACAATGGGCGCAAGCCTGATGCAGCCATGCCGCGTGTATGAAGAAGGCCTTAGGGTTGTAAAGTACTTTCAGCGGGGAGGAAGG…
D117	2511	N	BHI	Proteobacteria	Gammaproteobacteria	Enterobacteriales	Enterobacteriaceae	Escherichia-Shigella	0.65	Proteus mirabilis strain FDAARGOS_60	0.99	0.95	CGCCCTCCCGAAGGTTAAGCTACCTACTTCTTTTGCAACCCACTCCCATGGTGTGACGGGCGGTGTGTACAAGGCCCGGGAACGTATTCACCGTAGCATTCTGATCTACGATTACTAGCGATTCCGACTTCATGGAGTCGAGTTGCAGACTCCAATCCGGACTACGACGGACTTTATGAGGTCCGCTTGCTCTCGCGAGGTCGCTTCTCTTTGTATCTGCCATTGTAGCACGTGTGTAGCCCTACTCGTAAGGGCCATGATGACTTGACGTCATCCCCACCTTCCTCCGGTTTATCACCGGCAGTCTCCTTTGAGTTCCCACCATTACCGGTTGGAAACAAAGGATAAGGGTTGCGCTCGTTGCGGAATTTAACCCAACATTCCACAACACAAGTTGAC…
D118	2511	N	BHI	Proteobacteria	Gammaproteobacteria	Enterobacteriales	Enterobacteriaceae	Citrobacter	0.91	Proteus mirabilis strain LCX7	1	0.87	TCCCGAAGGTTAAGCTACCTACTTCTTTTGCAACCCACTCCCATGGTGTGACGGGCGGTGTGTACAAGGGCCGGGAACGTATTCACCGTAGCATTCTGATCTACGATTACTAACGATTCCGACTTCATGGAGTCGAGTTGCAGACTCCAATCCGGACTACGACGAACTTTATGAAGACCGCTTGATCTCGCGAGGTCGCTTCTCTTTGTATCTGCCATTGGAACACGTGTGTAGCCCTACTCGTAAGGGCCATGATGACTTGACGTCATCCCCACCTTCCTCCGGTTTATCACCGGCAGTCTCCTTTGAGTTCCCACCATTACCGGTTGGAAAAAAAGGAAAAGGGTGGCGTTCGTTGGGGAATTTACCCCAATATTTCACAACACAAGTTAACAACGG…
D119	2511	N	BHI	Proteobacteria	Gammaproteobacteria	Enterobacteriales	Enterobacteriaceae	Citrobacter	0.58	Proteus mirabilis strain HH141	1	0.95	GCAAGTCGAGCGGTAACAGGATAAAGCTTGCTTTCTCGCTGACGAGAGGCGGACGGGTGAGTAATGTATGGGAATCTGCCCGATGGAGGGGGATAACTACTGGAAACGGTGGCTAATACCGCATAACGTCTAAAGACCATAGAAGGGGATCTTCAGACCTTGCACTATCGGATGAGCCCATATGGGATTAGCTAGTAGGGGGGGTAATGGCTCACCTAGGCGACGATCTCTAGCTGGTCTGAGAGGATGATCACCCACACTGGGACTGAGACACGGGCCACACTCCTACGGGAGGCACCACTGGGGAATATTGCACAATGGGCGCAAGCCTGATGCACCCATGCCGCGTGTATGAAGAAGGCCTTAGGGTTGTAAAGTACTTTCAGCGGGGAGGAAGGT…
D120	2511	N	BHI	Proteobacteria	Gammaproteobacteria	Enterobacteriales	Enterobacteriaceae	Citrobacter	0.95	Proteus mirabilis strain WWi82	1	0.98	TGCAGTCGAGCGGTAACAGGAGAAAGCTTGCTTTCTCGCTGACGAGCGGCGGACGGGTGAGTAATGTATGGGGATCTGCCCGATGGAGGGGGATAACTACTGGAAACGGTGGCTAATACCGCATAACGTCTAAGGACCAAAGAAGGGGATCTTCGGACCTTGCACTATCGGATGAGCCCATATGGGATTAGCTAGTAGGTGGGGTAATGGCTCACCTAGGCGACGATCTCTAGCTGGTCTGAGAGGATGATCACCCACACTGGGACTGAGACACGGGCCAGACTCCTACGGGAGGCAGCAGTGGGGAATATTGCACAATGGGCGCAAGCCTGATGCAGCCATGCCGCGTGTATGAAGAAGGCCTTAGGGTTGTAAAGTACTTTCAGCGGGGAGGAAGGT…
D121	2511	N	BHI	Proteobacteria	Gammaproteobacteria	Enterobacteriales	Enterobacteriaceae	Escherichia-Shigella	0.9	Proteus mirabilis strain FC2969	0.97	0.93	AGCGCCCTCCCGAAGGTTAAGCTACCTACTTCTTTTGCAACCCACTCCCATGGTGTGACGGGCGGTGTGTACAAGGGCCGGGAACGTATTCACCGTAGCATTCTGATCTACGATTACTAACGATTCCGACTTCATGGAGTCGAGTTGCAGACTCCAATCCGGACTACGACGGACTTTATGAAGTCCGCTTGCTCTCGCGAGGTCGCTTCTCTTTGTATCTGCCATTGTAGCACGTGTGTAGCCCTACTCGTAAGGGCCATGATGACTTGACGTCATCCCCACCTTCCTCCGGTTTATCACCGGCAGTCTCCTTTGAGTTCCCACCATTACCGGTTGGAAACAAAGGAAAAGGGTTGCGCTCGTTGCGGAATTTAACCCAACATTTCACAACACAAGTTG…
D122	2511	N	CBA	Firmicutes	Bacilli	Lactobacillales	Enterococcaceae	Enterococcus	0.64	Uncultured organism clone ELU0043-T225-S-NIPCRAMgANa_000096	0.99	0.97	GTAGTCGGCTGGCTCCGAAGGGTTACCTCACCGACTTCTTTTGTTACCAATTCTCGTGGTGTGACGGGGGGGGGGTACAAGGCCCGGAAACGTATTCACCGCGGCGTGCTGATCCGCGAACTAAGCGATTCCGGCTTCATGAAGGCAAGTTGCAACCTACAATCCGAACTGAGAGAAGCTTTAGAAGATTACTTGATCCTCGCGACTTCCTAACTCGTTGTACTTCCCATTGTACCACGTGTGTACCCCAGGTCATAAGGGGCATGATGATTTGACGTCATCCCCACCTTCCTCCGGTTTGTCACCGGCAGTCTCGCTAGAGTGCCCAACTAAATGATGGCAACTAACAATAAGGGTTGCGCTCGTTGCGGGACTTAACCCAACATCTCACGACACGAG…
D123	2511	N	CBA	Firmicutes	Bacilli	Lactobacillales	Enterococcaceae	Enterococcus	0.64	Enterococcus gallinarum strain HCD9-4	0.99	0.94	TGCAGTCGAACGCTTTTTCTTTCCCGTTGCTTGCTCCACCGAAAGAGAAGAGTGGCGAACGGGTTAGTAACACGTGGCCCGCCTGCCCATCATAAGGGGATAACACTTGGAATCAGGTGCTAATACCGCATAACACTATTTTCCGCATGCAACAAAGCTGAAAGGCGCTTTTGCGTCCCTGATGGATGGACCCGCGGGGCATTAACTAGTTGGTGAGGTAACGGATCACCAAGGGCACGATGCATATGCGACCTGAGAGGGTGATCGACCACACTGCCACTGAGACACGGCCCAGACTCCTACGGAAGGCAGCAGTATGGAATCTTCGGCAATGGACGAAAGTCTGACCGAGCAACACCGCGTGAGTGAAGAAGGTTTTCGGATCGTAAAACTCTGTTG…
D124	2511	N	CBA	Proteobacteria	Gammaproteobacteria	Enterobacteriales	Enterobacteriaceae	Escherichia-Shigella	1	Proteus mirabilis strain AR_0029	1	0.99	TGCAAGTCGAGCGGTAACAGGAGACAGCTTGCTTTCTTGCTGACGAGTGGCGGACGGGTGAGTAATGTATGGGGAACTGCCCGATGGAGGGGGATAACTACTGGAAACGGTGGCTAATACCGCATAATGTCTACGGACCAAAGAAGGGGATCTTCGGACCTTGCACTATCGGATGAGCCCATATGGGATTAGCTAGTAGGTGGGGTAAAGGCTCACCTAGGCGACGATCTCTAGCTGGTCTGAGAGGATGATCAGCCACACTGGGACTGAGACACGGCCCAGACTCCTACGGGAGGCAGCAGTGGGGAATATTGCACAATGGGCGCAAGCCTGATGCAGCCATGCCGCGTGTATGAAGAAGGCCTTAGGGTTGTAAAGTACTTTCAGCGGGGAGGAAGG…
D125	2511	N	CBA	Proteobacteria	Gammaproteobacteria	Enterobacteriales	Enterobacteriaceae	Escherichia-Shigella	0.95	Proteus mirabilis strain BC11-24	0.99	0.92	CCCGAAGGTTAAGCTACCTACTTCTTTTGCAACCCACTCCCATGGTGTGACGGGCGGTGTGTACAAGGCCCGGGAACGTATTCACCGTGGCATTCTGATCTACGATTACTAGCGATTCCGACTTCATGGAGTCGAGTTGCAGACTCCAATCCGGACTACGACGGACTTTATGAGTTCCGCTTGCTCTCGCGAGGTCGCTTCTCTTTGTATCTGCCATTGTAGCACGTGTGTAGCCCTGCTCGTAAGGGCCATGATGACTTGACGTCATCCCCACCTTCCTCCGGTTTATCACCGGCAGTCTCCTTTGAGTTCCCACCATTACGGGTTGGAAACAAAGGAAAAGGGTTGCGTTCGTTGGGGAATTTAACCCAACATTTCACAACAGGAGTTGACGAAAGC…
D126	2511	N	CBA	Proteobacteria	Gammaproteobacteria	Enterobacteriales	Enterobacteriaceae	Escherichia-Shigella	0.92	Proteus mirabilis strain FDAARGOS_67	0.99	0.97	GTCGAGCGGTAACAGGAGAAAGCTTGCTTTCTCGCTGACGAGCGGCGGACGGGTGAGTAATGTATGGGAATCTGCCCGATGGAGGGGGATAACTACTGGAAACGGTGGCTAATACCGCATAACGTCTACAGACCAAAGAAGGGGCTCTTCGGACCTTGTGCTATCGGATGAGCCCATATGGGATTAGCTAGTAGGTGGGGTAAAGGCTCACCTAGGCGACGATCTCTAGCTGGTCTGAGAGGATGATCAGCCACACTGGGACTGAGACACGGCCCAGACTCCTACGGGAGGCAGCAGTGGGGAATATTGCACAATGGGCGCAAGCCTGATGCAGCCATGCCGCGTGTATGAAGAAGGCCTTAGGGTTGTAAAGTACTTTCAGCGGGGAGGAAGGTGATA…
D127	2511	N	CBA	Proteobacteria	Gammaproteobacteria	Enterobacteriales	Enterobacteriaceae	Klebsiella	0.58	Proteus penneri strain L1	0.99	0.92	GCCCTCCCGAAGGTTAAGCTACCTACTTCTTTTGCAACCCACTCCCATGGTGTGACGGGCGGTGTGTACAAGGCCCGGGAACGTATTCACCGTAGCATTCTGATCTACGATTACTAGCGATTCCGACTTCATGGAGTCGAGTTGCAGACTCCAATCCGGACTACGACAGACTTTATGAGGTCCGCTTGCTCTCGCGAGGTCGCTTCTCTTTGTATCTGCCATTGTAGCACGTGTGTAGCCCTACTCGTAAGGGCCATGATGACTTGACGTCATCCCCACCTTCCTCCGGTTTATCACCGGCAGTCTCCTTTGAGTTCCCACCATTACGTGCTGGAAACAAAGGAAAAGGGTTGCGCTCGTTGCGGGACTTAACCCAACATTTCACAACACAAGTTGACA…
D128	2508	Y	CBA	Firmicutes	Bacilli	Bacillales	Planococcaceae	Lysinibacillus	1	Lysinibacillus sp. LS-065	1	1	TGCAAGTCGAGCGAACAGAAAAGGAGCTTGCTCCTTTGACGTTAGCGGCGGACGGGTGAGTAACACGTGGGCAACCTACCCTATAGTTTGGGATAACTCCGGGAAACCGGGGCTAATACCGAATAATCTCCTTTACTTCATGGTGAAGGACTGAAAGACGGTTTCGGCTGTCGCTATAGGATGGGCCCGCGGCGCATTAGCTAGTTGGTGAGGTAACGGCTCACCAAGGCGACGATGCGTAGCCGACCTGAGAGGGTGATCGGCCACACTGGGACTGAGACACGGCCCAGACTCCTACGGGAGGCAGCAGTAGGGAATCTTCCACAATGGGCGAAAGCCTGATGGAGCAACGCCGCGTGAGTGAAGAAGGTTTTCGGATCGTAAAACTCTGTTGTAAGG…
D129	2511	Y	CBA	Proteobacteria	Gammaproteobacteria	Enterobacteriales	Enterobacteriaceae	Citrobacter	1	Proteus mirabilis strain PBLMG2	1	0.99	AGTCGAGCGGTAACAGGAGACAGCTTGCTTTCTTGCTGACGAGCGGCGGACGGGTGAGTAATGTATGGGGATCTGCCCGATGGAGGGGGATAACTACTGGAAACGGTGGCTAATACCGCATAATGTCTACGGACCAAAGAAGGGGATCTTCGGACCTTGTACTATCGGATGAACCCATATGGGATTAGCTAGTAGGTGGGGTAAAGGCTCACCTAGGCGACGATCTCTAGCTGGTCTGAGAGGATGATCAGCCACACTGGGACTGAGACACGGCCCAGACTCCTACGGGAGGCAGCAGTGGGGAATATTGCACAATGGGCGCAAGCCTGATGCAGCCATGCCGCGTGTATGAAGAAGGCCTTAGGGTTGTAAAGTACTTTCAGCGGGGAGGAAGGGGAT…
D130	2511	Y	CBA	Proteobacteria	Gammaproteobacteria	Enterobacteriales	Enterobacteriaceae	Enterobacter	0.86	Bacterium NLAE-zl-C296	1	0.92	CGCCCTCCCGAAGGTTAAGCTACCTACTTCTTTTGCAACCCACTCCCATGGTGTGACGGGCGGTGTGTACAAGGCCCGGGAACGTATTCACCGTAGCATTCTGATCTACGATTACTAGCGATTCCGACTTCATGGAGTCGAGTTGCAGACTCCAATCCGGACTACGACAGACTTTATGAGGTCCGCTTGCTCTCGCGAGGTCGCTTCTCTTTGTATGTGCCATTGTAGCACGTGTGTAGCCCTACTCGTAAGGGCCATGATGACTTGACGTCATCCCCACCTTCCTCCGGTTTATCACCGGCAGTCTCCTTTGAGTTCCCACCATTACCGGTTGGAAAAAAAGGATAAGGGTTGGGTTCGTTGGGGAATTTAACCCAAAATTTCACAACAGGAGTTGAG…
D131	2511	Y	CBA	Firmicutes	Bacilli	Lactobacillales	Enterococcaceae	Enterococcus	1	Enterococcus gallinarum strain HCD28-1	1	1	TGCAAGTCGAACGCTTTTTCTTTCACCGGAGCTTGCTCCACCGAAAGAAAAAGAGTGGCGAACGGGTGAGTAACACGTGGGTAACCTGCCCATCAGAAGGGGATAACACTTGGAAACAGGTGCTAATACCGTATAACACTATTTTCCGCATGGAAGAAAGTTGAAAGGCGCTTTTGCGTCACTGATGGATGGACCCGCGGTGCATTAGCTAGTTGGTGAGGTAACGGCTCACCAAGGCCACGATGCATAGCCGACCTGAGAGGGTGATCGGCCACACTGGGACTGAGACACGGCCCAGACTCCTACGGGAGGCAGCAGTAGGGAATCTTCGGCAATGGACGAAAGTCTGACCGAGCAACGCCGCGTGAGTGAAGAAGGTTTTCGGATCGTAAAACTCTG…
D132	2508	Y	BAB	Firmicutes	Bacilli	Bacillales	Planococcaceae	Lysinibacillus	1	Lysinibacillus sp. YS11	1	1	TACATGCAAGTCGAGCGAACAGAAAAGGAGCTTGCTCCTTTGACGTTAGCGGCGGACGGGTGAGTAACACGTGGGCAACCTACCCTATAGTTTGGGATAACTCCGGGAAACCGGGGCTAATACCGAATAATCTCCTTTACTTCATGGTGAAGGACTGAAAGACGGTTTCGGCTGTCGCTATAGGATGGGCCCGCGGCGCATTAGCTAGTTGGTGAGGTAACGGCTCACCAAGGCGACGATGCGTAGCCGACCTGAGAGGGTGATCGGCCACACTGGGACTGAGACACGGCCCAGACTCCTACGGGAGGCAGCAGTAGGGAATCTTCCACAATGGGCGAAAGCCTGATGGAGCAACGCCGCGTGAGTGAAGAAGGTTTTCGGATCGTAAAACTCTGTTGT…
D133	2508	Y	BAB	Firmicutes	Bacilli	Bacillales	Planococcaceae	Lysinibacillus	1	Lysinibacillus sp. strain P5	1	1	TGCAAGTCGAGCGAACAGAAAAGGAGCTTGCTCCTTTGACGTTAGCGGCGGACGGGTGAGTAACACGTGGGCAACCTACCCTATAGTTTGGGATAACTCCGGGAAACCGGGGCTAATACCGAATAATCTCCTTTACTTCATGGTGAAGGACTGAAAGACGGTTTCGGCTGTCGCTATAGGATGGGCCCGCGGCGCATTAGCTAGTTGGTGAGGTAACGGCTCACCAAGGCGACGATGCGTAGCCGACCTGAGAGGGTGATCGGCCACACTGGGACTGAGACACGGCCCAGACTCCTACGGGAGGCAGCAGTAGGGAATCTTCCACAATGGGCGAAAGCCTGATGGAGCAACGCCGCGTGAGTGAAGAAGGTTTTCGGATCGTAAAACTCTGTTGTAAGG…
D134	2511	Y	BI	Proteobacteria	Gammaproteobacteria	Enterobacteriales	Morganellaceae	Providencia	0.33	Uncultured bacterium clone nby372d08c1	0.99	0.92	GTCGAACGCTTTTTCTTTCCCGTTGCTTGCTCCATCGAAAGAGAAGAGTGGCGAACGGGTGAGTAACACGTGGGTAACCTGCCCATCATAAGGGGATAACACTTGGAATCAGGTGCTAATACCGCATAACACTATTTTCCGCATGCTACAAAGCTGAAAGGAGCTTTTGCGTCCCTGATGGATGGACCCGCGGGGCATTAACTAGTTGGTGAGGTAACGGATCACCAAGGGCACGATGAAGATGCGACCTGAGAGGGTGATCGACCACACTGCGACTGAGACACGGCCCAGACTCCTACGGAAGGCAGCAGTATGGAATCTTCGCTGATGGACGAAAGTCTGACCGAGCAACGCCGCGTGAGTGAAGAAGGTTTTCGGATCGTAAAACTCTGGTGTTAA…
D135	2511	Y	BI	Proteobacteria	Gammaproteobacteria	Enterobacteriales	Morganellaceae	Providencia	0.33	Uncultured organism clone ELU0043-T225-S-NIPCRAMgANa_000096	1	0.94	TCCAAAGGGTTACCTCACCGATTTCTTTGGTTACCAATTCTCGTGGTGTGACGGGGGGGGGGTACAAGGCCCGGAAACGTATTCACCGCGGCGTGCTGATCCGCGATTACTAGCGATTCCGGCTTCATGAAGGCAAGTTGCAACCTACAATCCGAATTGAGAGAAGTTTTAGAAGATTACTTGATCCTCGGGAGTTCCTAACTCGTTGAACTTCCCATTGAACAAGGGGGGTACCCCAGGTCATAAGGGGCATGATGATTTGACGTCATCCCCACCTTCCTCCGGTTTGCCACCGGCAGTCTCTTTAGAGTGCCCAACTAAATGATGGCAACTAACAATAAGGGTTGCGCTCGTTGCGGGACTTAACCCAACATCTCACGACACGAGCTGACGACAACC…
D136	2511	Y	LBB	Firmicutes	Bacilli	Bacillales	Staphylococcaceae	Staphylococcus	1	Staphylococcus warneri strain HlW2200907	1	1	TGCAAGTCGAGCGAACAGATAAGGAGCTTGCTCCTTTGACGTTAGCGGCGGACGGGTGAGTAACACGTGGATAACCTACCTATAAGACTGGGATAACTTCGGGAAACCGGAGCTAATACCGGATAACATATTGAACCGCATGGTTCAATAGTGAAAGGCGGCTTTGCTGTCACTTATAGATGGATCCGCGCCGTATTAGCTAGTTGGTAAGGTAACGGCTTACCAAGGCAACGATACGTAGCCGACCTGAGAGGGTGATCGGCCACACTGGAACTGAGACACGGTCCAGACTCCTACGGGAGGCAGCAGTAGGGAATCTTCCGCAATGGGCGAAAGCCTGACGGAGCAACGCCGCGTGAGTGATGAAGGTCTTCGGATCGTAAAACTCTGTTATCAGGG…
D137	2511	Y	LBB	Firmicutes	Bacilli	Bacillales	Staphylococcaceae	Staphylococcus	1	Staphylococcus sp. sh_56	1	1	GGCTAGCTCCATAAATGGTTACTCCACCGGCTTCGGGTGTTACAAACTCTCGTGGTGTGACGGGCGGTGTGTACAAGACCCGGGAACGTATTCACCGTAGCATGCTGATCTACGATTACTAGCGATTCCAGCTTCATGTAGTCGAGTTGCAGACTACAATCCGAACTGAGAACAACTTTATGGGATTTGCTTGACCTCGCGGTTTAGCTGCCCTTTGTATTGTCCATTGTAGCACGTGTGTAGCCCAAATCATAAGGGGCATGATGATTTGACGTCATCCCCACCTTCCTCCGGTTTGTCACCGGCAGTCAACTTAGAGTGCCCAACTTAATGATGGCAACTAAGCTTAAGGGTTGCGCTCGTTGCGGGACTTAACCCAACATCTCACGACACGAGCTG…
D138	2511	Y	LBB	Firmicutes	Bacilli	Bacillales	Staphylococcaceae	Staphylococcus	1	Staphylococcus sp. strain GD01	1	1	TGCAAGTCGAGCGAACAGATAAGGAGCTTGCTCCTTTGACGTTAGCGGCGGACGGGTGAGTAACACGTGGATAACCTACCTATAAGACTGGGATAACTTCGGGAAACCGGAGCTAATACCGGATAACATATTGAACCGCATGGTTCAATAGTGAAAGGCGGCTTTGCTGTCACTTATAGATGGATCCGCGCCGTATTAGCTAGTTGGTAAGGTAACGGCTTACCAAGGCAACGATACGTAGCCGACCTGAGAGGGTGATCGGCCACACTGGAACTGAGACACGGTCCAGACTCCTACGGGAGGCAGCAGTAGGGAATCTTCCGCAATGGGCGAAAGCCTGACGGAGCAACGCCGCGTGAGTGATGAAGGTCTTCGGATCGTAAAACTCTGTTATCAGGG…

## Sheet: ST2
Table S2| Detailed information of 35 whole-genome sequenced bile species.
Strain ID	Subject ID	Strain name	Number of scaffolds	Genome size (bp)	N50 length (bp)	N90 length (bp)	Max length (bp)	% G+C content	Number of genes	NCBI nearest assembled genome	NCBI nearest assembled genome name	ANI
D008	2504	Klebsiella pneumoniae D008	181	5269214	75740	23007	214265	57.4	4972	GCA_000739495.1	Klebsiella pneumoniae strain blaNDM-1	99.2
D023	2511	Enterococcus sp. FDAARGOS_553 strain D023	24	3114318	350546	93614	802950	40.7	2990	GCA_003812305.1	Enterococcus sp. FDAARGOS_553	99.6
D024	2514	Lactobacillus murinus D024	119	1931125	34123	8788	98947	40.3	1890	GCA_003288135.1	Lactobacillus murinus strain CR141	98
D028	2504	Klebsiella aerogenes D028	68	5221431	260812	79706	1003061	54.8	4908	GCA_001021995.1	Klebsiella aerogenes strain CAV1320	98.4
D036	2504	Klebsiella pneumoniae D036	50	5401591	370870	72825	540759	57.3	5116	GCA_004010995.1	Klebsiella pneumoniae strain 08EU827	99.9
D040	2514	Paenibacillus lautus D040	32	7130300	597011	156126	903803	51.1	6472	GCA_003590055.1	Paenibacillus lautus strain E7593-69	98.7
D044	2504	Enterococcus faecalis D044	13	2883736	514601	251388	879671	37.5	2751	GCA_001886675.1	Enterococcus faecalis strain L12	99.6
D049	2504	Escherichia coli D049	132	4661089	91997	24322	315785	50.7	4365	GCA_002310715.1	Escherichia coli strain 1223	99.9
D050	2504	Enterococcus casseliflavus D050	1807	3009358	2145	829	9052	43	2578	GCA_000157355.2	Enterococcus casseliflavus EC20	98.1
D055	2504	Klebsiella aerogenes D055	56	4952123	207438	58052	832425	55	4622	GCA_001021995.1	Klebsiella aerogenes strain CAV1320	98.4
D057	2504	Klebsiella aerogenes D057	40	5091289	315767	88499	588292	55.1	4782	GCA_003546885.1	Klebsiella aerogenes strain FDAARGOS_327	98.4
D060	2514	Lysinibacillus sp. D060	30	4649859	347251	106355	754937	37.4	4686	GCA_002896375.1	Lysinibacillus sp. YS11	96.6
D062	2514	Citrobacter sp. CRE-46 strain D062	58	5175683	333633	49400	716094	52.2	4909	GCA_003204265.1	Citrobacter sp. CRE-46 strain AR_0157	99.8
D063	2514	Escherichia coli D063	82	4962375	185079	43574	415276	50.7	4768	GCA_001900945.1	Escherichia coli strain S40	99.3
D070	2504	Enterococcus faecalis D070	36	2874522	243942	61926	621332	37.5	2730	GCA_001886675.1	Enterococcus faecalis strain L12	99.7
D074	2514	Vibrio sp. D074	87	3931398	146463	26001	368616	43.7	3559	GCA_002287545.1	Vibrio anguillarum strain VIB43	79.6
D084	2511	Enterococcus sp. FDAARGOS_553 strain D084	25	3291232	276365	138061	443369	40.6	3114	GCA_003812305.1	Enterococcus sp. FDAARGOS_553	98.8
D090	2508	Lactobacillus murinus D090	123	1968516	31717	8330	98889	40.2	1939	GCA_003288135.1	Lactobacillus murinus strain CR141	98.1
D092	2508	Corynebacterium testudinoris D092	26	2599273	577574	111802	879586	63.3	2520	GCA_001021045.1	Corynebacterium testudinoris strain DSM 44614	97.8
D093	2508	Psychrobacter sp. D093	99	2687392	60762	16333	181875	43.4	2264	GCA_000013905.1	Psychrobacter cryohalolentis K5	82.9
D095	2508	Corynebacterium testudinoris D095	113	2727077	139374	35818	251618	63.2	2638	GCA_001021045.1	Corynebacterium testudinoris strain DSM 44614	99.6
D097	2511	Morganella morganii D097	18	3777797	475885	126204	1547443	51.1	3623	GCA_900635025.1	Morganella morganii strain NCTC235	99.2
D105	2504	Enterococcus faecalis D105	17	2883340	514519	183738	722915	37.5	2745	GCA_001886675.1	Enterococcus faecalis strain L12	99.7
D107	2504	Enterococcus faecalis D107	26	2778047	317396	123889	729529	37.5	2612	GCA_000172575.2	Enterococcus faecalis OG1RF	99.1
D111	2504	Klebsiella pneumoniae D111	67	5407221	292115	60466	598472	57.3	5122	GCA_004010995.1	Klebsiella pneumoniae strain 08EU827	99.9
D113	2504	Citrobacter sp. CRE-46 strain D113	75	5160673	555360	54460	773970	52.1	4929	GCA_003204265.1	Citrobacter sp. CRE-46 strain AR_0157	99.7
D114	2511	Staphylococcus pettenkoferi D114	32	2464279	268047	94493	394206	38.8	2375	GCA_002208805.2	Staphylococcus pettenkoferi strain FDAARGOS_288	97.5
D118	2511	Citrobacter sp. CRE-46 strain D118	43	5131072	315331	64447	653115	52.1	4906	GCA_003204265.1	Citrobacter sp. CRE-46 strain AR_0157	99.8
D119	2511	Citrobacter sp. CRE-46 strain D119	119	4929413	112340	21938	385296	52.1	4633	GCA_003204265.1	Citrobacter sp. CRE-46 strain AR_0157	99.7
D122	2511	Enterococcus faecalis D122	46	2785663	1463088	134431	1463088	37.5	2614	GCA_900636775.1	Enterococcus faecalis strain NCTC8745	99
D128	2508	Solibacillus silvestris D128	541	3640563	11233	3075	58835	38.7	3511	GCA_000271325.1	Solibacillus silvestris StLB046 DNA	98.7
D129	2511	Citrobacter sp. CRE-46 strain D129	74	5011035	171796	46725	523905	52.1	4760	GCA_003204265.1	Citrobacter sp. CRE-46 strain AR_0157	99.8
D130	2511	Klebsiella aerogenes D130	29	5095422	711731	88484	1391743	55.1	4784	GCA_001021995.1	Klebsiella aerogenes strain CAV1320	98.4
D131	2511	Enterococcus sp. FDAARGOS_553 strain D131	24	3113597	350546	93614	802791	40.7	2988	GCA_003812305.1	Enterococcus sp. FDAARGOS_553	99.6
D135	2511	Providencia sp. D135	27	4453593	316426	117677	1091837	40.1	4101	GCA_002843235.2	Providencia sp. WCHPr000369	92.3

## Sheet: ST3
Table S3| Detailed information of the ARGs of the bile species.
Strain ID	Gene ID	ARG name	ARG type	NCBI accession	CARD accession	Resfinder accession	Argannot accession							Total number of genes	%
D008	ctg_120_15	CRP	MDR-RND		AP009048.1:4153664-4154297								fluoroquinolone	58	0.122881
D008	ctg_14_106	marA	MDR-RND		AP009048.1:1621288-1621672								aminoglycoside	43	0.0911017
D008	ctg_14_127	blaSHV-40	β-lactamase	NG_062281.1	AF535128:1-862	AF535128	AF535128:1-861						β-lactamase	34	0.0720339
D008	ctg_172_3	qnrB4	fluoroquinolone	NG_050502.1	DQ303921:1-649	DQ303921	DQ303921:4-648						tetracycline	21	0.0444915
D008	ctg_191_4	blaDHA-15	β-lactamase	NG_049055.1	KM087853:1-1141	Y16410	HM193083:987-2126						glycopeptide	19	0.0402542
D008	ctg_221_2	tet(D)	tetracycline	NG_048184.1	AF467077.1:164-1349	AF467077	AB089602:1521-2705						peptide	19	0.0402542
D008	ctg_24_6	H-NS	MDR-other		BA000007.3:1737691-1738105								trimethoprim	19	0.0402542
D008	ctg_251_1	catA1	phenicol	NG_047586.1	KF030445.1:23980-24640	V00622	V00622:244-903						nitroimidazole	14	0.029661
D008	ctg_256_1	sul2	sulfonamide	NG_051852.1	AY055428.1:20269-21085	AY034138	EU360945:1617-2432						sulfonamide	11	0.0233051
D008	ctg_263_1	blaTEM-1	β-lactamase	NG_050145.1	AL513383:161911-162772	AY458016	AF516720:215-1075						fosfomycin	8	0.0169492
D008	ctg_29_118	emrR	fluoroquinolone		U00096.3:2810770-2811301								macrolide	7	0.0148305
D008	ctg_29_75	oqxA	fluoroquinolone	NG_050418.1	EU370913.1:46652-47828	EU370913	EU370913:46652-47827						phenicol	7	0.0148305
D008	ctg_29_76	oqxB	fluoroquinolone	NG_050452.1	EU370913.1:47851-51004	EU370913	EU370913:47851-51003						rifampicin	5	0.0105932
D008	ctg_37_90	msbA	nitroimidazole		U00096.3:966621-968370								oxazolidinone	2	0.00423729
D008	ctg_44_25	fosA6	fosfomycin	NG_047884.1	KU254579.1:59422-59842	ACWO01000079	KU254579:59422-59841						bacitracin	1	0.00211864
D008	ctg_49_55	baeR	MDR-RND		AP009048.1:2166413-2167136								lincosamide	1	0.00211864
D008	ctg_49_59	mdtB	MDR-RND		U00096:2155263-2158386								rifampin	1	0.00211864
D008	ctg_51_52	ampH	β-lactamase				CP003785:4208384-4209544						streptogramin B	1	0.00211864
D008	ctg_53_43	cpxA	aminoglycoside		BA000007.3:4903689-4905063								MDR-RND	157	0.332627
D008	ctg_54_1	arcA	MDR-RND		AJ318073.1:794-1991								MDR-MFS	12	0.0254237
D008	ctg_54_2	arcB	MDR-RND		U00096.3:481254-484404								MDR-ABC	11	0.0233051
D008	ctg_99_23	ramA	MDR-RND		JQ727668:1-376								MDR-other	15	0.0317797
D023	ctg_4_15	vanSC	glycopeptide	NG_048430.1	AF162694:5878-6964		DQ022190:4672-5757						MDR-MATE	5	0.0105932
D023	ctg_4_16	vanRC	glycopeptide	NG_048404.1	AF162694:5193-5889		AF162694:5193-5888						MDR-SMR	1	0.00211864
D023	ctg_4_17	vanTC	glycopeptide	NG_048454.1	AF162694:3008-5105		AF162694:3008-5104
D023	ctg_4_18	vanXYC	glycopeptide	NG_048503.1	AF162694:2439-3012		DQ022190:1233-1805
D023	ctg_4_19	vanC1	glycopeptide	NG_048343.1	AF162694:1411-2443		AF162694:1411-2442
D028	ctg_1_785	marA	MDR-RND		AP009048.1:1621288-1621672
D028	ctg_14_138	ramA	MDR-RND		JQ727668:1-376
D028	ctg_14_35	arcB	MDR-RND		U00096.3:481254-484404
D028	ctg_14_36	arcA	MDR-RND		AJ318073.1:794-1991
D028	ctg_21_111	mdfA	MDR-RND			Y08743
D028	ctg_222_2	sul1	sulfonamide	NG_048082.1	JF969163:1054-1894	U12338	AF071413:6700-7539
D028	ctg_222_5	qnrB17	fluoroquinolone	NG_050523.1	AM919398:1-682	EF523819	AM919398:1-681
D028	ctg_222_8	sul1	sulfonamide	NG_048082.1	JF969163:1054-1894	U12338	AF071413:6700-7539
D028	ctg_25_52	blaCMY2	β-lactamase	NG_051160.1
D028	ctg_25_93	ampH	β-lactamase				CP003785:4208384-4209544
D028	ctg_262_1	AAC(6')-Ib-cr	aminoglycoside	NG_052213.1	DQ303918:1-601	DQ303918
D028	ctg_262_2	arr-3	rifampicin	NG_048581.1	EU675686:1957-2410	JF806499	JF806499:1353-1805
D028	ctg_262_3	dfrA27	trimethoprim	NG_047723.1	KP076293.1:2348-2822	FJ459817	EU675686:2543-3016
D028	ctg_262_4	aadA16	aminoglycoside	NG_047339.1	EU675686:3197-4043	EU675686	EU675686:3197-4042
D028	ctg_282_1	tetR	tetracycline				HF545434:53576-54226
D028	ctg_282_2	tet(A)	tetracycline	NG_048153.1	AF534183.1:2971-4246	AJ517790	JX424423:94438-95712
D028	ctg_3_437	CRP	MDR-RND		AP009048.1:4153664-4154297
D028	ctg_31_33	acrD	MDR-RND		AP009048.1:2586251-2589365
D028	ctg_324_1	APH(3')-Ia	aminoglycoside	NG_047430.1	BX664015.1:103018-103834	V00359	HQ840942:23569-24384
D028	ctg_38_11	emrR	fluoroquinolone		U00096.3:2810770-2811301
D028	ctg_42_30	fosA5	fosfomycin	NG_047881.1	KP143090.1:1200-1620	ACZD01000244	KP143090:1200-1619
D028	ctg_6_110	mdtC	MDR-RND		U00096:2158386-2161464
D028	ctg_6_113	baeR	MDR-RND		AP009048.1:2166413-2167136
D028	ctg_61_35	cpxA	aminoglycoside		BA000007.3:4903689-4905063
D028	ctg_7_274	oqxA	fluoroquinolone	NG_050427.1	EU370913.1:46652-47828	EU370913	EU370913:46652-47827
D028	ctg_7_275	oqxB	fluoroquinolone	NG_050439.1	EU370913.1:47851-51004	EU370913	EU370913:47851-51003
D028	ctg_7_323	H-NS	MDR-other		BA000007.3:1737691-1738105
D028	ctg_87_4	msbA	nitroimidazole		U00096.3:966621-968370
D036	ctg_1_237	H-NS	MDR-other		BA000007.3:1737691-1738105
D036	ctg_11_224	baeR	MDR-RND		AP009048.1:2166413-2167136
D036	ctg_11_227	mdtC	MDR-RND		U00096:2158386-2161464
D036	ctg_11_228	mdtB	MDR-RND		U00096:2155263-2158386
D036	ctg_12_151	emrR	fluoroquinolone		U00096.3:2810770-2811301
D036	ctg_12_193	oqxB	fluoroquinolone	NG_050435.1	EU370913.1:47851-51004	EU370913	EU370913:47851-51003
D036	ctg_12_194	oqxA	fluoroquinolone	NG_050418.1	EU370913.1:46652-47828	EU370913	EU370913:46652-47827
D036	ctg_17_49	acrD	MDR-RND		AP009048.1:2586251-2589365
D036	ctg_2_160	arcB	MDR-RND		U00096.3:481254-484404
D036	ctg_2_161	arcA	MDR-RND		AJ318073.1:794-1991
D036	ctg_2_278	ramA	MDR-RND		JQ727668:1-376
D036	ctg_2_33	ampH	β-lactamase				CP003785:4208384-4209544
D036	ctg_25_57	cpxA	aminoglycoside		BA000007.3:4903689-4905063
D036	ctg_3_380	marA	MDR-RND		AP009048.1:1621288-1621672
D036	ctg_3_400	blaSHV-106	β-lactamase	NG_062284.1	AM941847:1-862	AM922307	AM941847:1-861
D036	ctg_6_129	msbA	nitroimidazole		U00096.3:966621-968370
D036	ctg_8_310	CRP	MDR-RND		AP009048.1:4153664-4154297
D036	ctg_9_12	fosA5	fosfomycin	NG_047881.1	KP143090.1:1200-1620	ACZD01000244	KP143090:1200-1619
D040	ctg_1_756	llmA	lincosamide		KX531046.1:1-865
D040	ctg_17_96	BahA	bacitracin		KX531048.1:1-2260
D040	ctg_24_72	mphI	macrolide		KX531056.1:1-928	KX531056
D040	ctg_3_240	taeA	MDR-ABC	NG_063829.1	KX531049.1:1-1948
D040	ctg_3_59	tetA(48)	tetracycline	NG_056048.1	KX531044.1:1-1033		NG_056048:1-1032
D040	ctg_3_60	tetB(48)	tetracycline	NG_056049.1	KX531045.1:1-817
D040	ctg_4_401	cpaA	aminoglycoside		KX531054.1:1-487
D040	ctg_7_227	rphB	rifampin		KX531052.1:1-2656
D040	ctg_7_308	cipA	MDR-other	NG_055645.1	CP001793.1:3931127-3932168
D040	ctg_8_27	AAC(6')-34	aminoglycoside		KX531053.1:1-595
D040	ctg_8_296	vgb(C)	streptogramin B	NG_056050.1	KX531055.1:1-892
D044	ctg_2_209	mphD	macrolide				NC_017312:2291580-2292413
D044	ctg_2_728	lsaA	MDR-MFS	NG_047931.1	AY225127.1:41-1538	AY225127	AY225127:41-1537
D044	ctg_41_3	APH(3')-IIIa	aminoglycoside	NG_047418.1	CP004067:52915-53710	M26832	V01547:535-1329
D044	ctg_41_4	sat4	aminoglycoside	NG_048072.1	U01945:374-917		X92945:38870-39412
D044	ctg_41_5	aad(6)	aminoglycoside		AY712687:1-832
D044	ctg_5_25	emeA	MDR-MATE		AB091338:174-1356
D044	ctg_5_442	dfrE	trimethoprim	NG_055770.1	AIIS01000002.1:233813-234308		NG_055770:101-595
D044	ctg_6_387	tetM	tetracycline	NG_048247.1	AM990992.1:1001761-1003681	EU182585	DQ534550:1451-3370
D044	ctg_9_371	efrA	MDR-ABC		HG970100.1:1-1458
D044	ctg_9_372	efrB	MDR-ABC		HG970103.1:1-1087
D044	ctg_9_42	dfrG	trimethoprim	NG_047756.1	AB205645:1013-1511	AB205645	AB205645:1013-1510
D049	ctg_10_202	mdfA	MDR-RND		JQ394987:1-1234	Y08743
D049	ctg_10_85	msbA	nitroimidazole		U00096.3:966621-968370
D049	ctg_107_1	mdtM	MDR-RND		U00096.3:4567287-4568520
D049	ctg_108_2	gadX	MDR-RND		AP009048.1:3974605-3975430
D049	ctg_108_3	gadW	MDR-RND		CP015085.1:2551712-2552441
D049	ctg_108_4	mdtF	MDR-RND		U00096:3660414-3663528
D049	ctg_108_5	mdtE	MDR-RND		AP009048.1:3980026-3981184
D049	ctg_126_21	CRP	MDR-RND		AP009048.1:4153664-4154297
D049	ctg_130_7	kdpE	aminoglycoside		U00096.3:721056-721734
D049	ctg_155_13	ampC	β-lactamase	NG_047494.1	NC_000913.3:4377811-4378945		CP002970:332756-333889
D049	ctg_16_166	yojI	peptide		U00096.3:2306972-2308616
D049	ctg_16_34	mdtA	MDR-RND		U00096:2154016-2155264
D049	ctg_16_35	mdtB	MDR-RND		U00096:2155263-2158386
D049	ctg_16_36	mdtC	MDR-RND		U00096:2158386-2161464
D049	ctg_16_38	baeS	MDR-RND		AP009048:2165013-2166417
D049	ctg_16_39	baeR	MDR-RND		AP009048.1:2166413-2167136
D049	ctg_188_6	acrE	MDR-RND		U00096:3413864-3415022
D049	ctg_188_7	acrF	MDR-RND		U00096:3415033-3418138
D049	ctg_211_6	H-NS	MDR-other		BA000007.3:1737691-1738105
D049	ctg_225_5	tet(B)	tetracycline	NG_048163.1	AB089595:1-1207	AF326777	AB089594:1-1206
D049	ctg_242_3	floR	phenicol	NG_047878.1	AF231986:3308-4523	AF118107	AKLJ01000508:383-1597
D049	ctg_256_1	mphA	macrolide	NG_047985.1	D16251.1:1626-2532	D16251	DQ445270:1626-2531
D049	ctg_27_103	bacA	peptide		U00096.3:3203310-3204132
D049	ctg_27_123	tolC	MDR-RND		FJ768952:1-1489
D049	ctg_295_1	dfrA17	trimethoprim	NG_047710.1	DQ838665:1-475	FJ460238	AB126604:98-571
D049	ctg_295_2	aadA5	aminoglycoside	NG_047357.1	AF137361:64-853	AF137361	AF137361:64-852
D049	ctg_32_30	eptA	peptide		AP009048:4338625-4340269
D049	ctg_32_63	mdtN	MDR-RND		AP009048.1:4306557-4307589
D049	ctg_32_64	mdtO	MDR-RND		AP009048.1:4304506-4306558
D049	ctg_32_65	mdtP	MDR-RND		AP009048.1:4303043-4304510
D049	ctg_35_55	cpxA	aminoglycoside		BA000007.3:4903689-4905063
D049	ctg_40_27	ampC	β-lactamase		FN649414.1:2765051-2766356		FN649414:2765051-2766355
D049	ctg_40_58	acrD	MDR-RND		AP009048.1:2586251-2589365
D049	ctg_48_42	ampC	β-lactamase		AP012030.1:395554-396712		AP012030:395554-396711
D049	ctg_49_20	mdtG	MDR-RND		CP000800.1:1191728-1192955
D049	ctg_49_32	mdtH	MDR-RND		U00096:1124118-1125327
D049	ctg_57_27	evgS	MDR-MFS		U00096:2484374-2487968
D049	ctg_57_28	evgA	MDR-MFS		BA000007.3:3212026-3212641
D049	ctg_57_29	emrK	fluoroquinolone		D78168:537-1593
D049	ctg_57_30	emrY	fluoroquinolone		D78168:1592-3131
D049	ctg_73_38	marA	MDR-RND		AP009048.1:1621288-1621672
D049	ctg_82_35	arcA	MDR-RND		U00096.3:484426-485620
D049	ctg_82_36	arcB	MDR-RND		U00096.3:481254-484404
D049	ctg_85_57	emrR	fluoroquinolone		U00096.3:2810770-2811301
D049	ctg_85_58	emrA	fluoroquinolone		AP009048:2810083-2811256
D049	ctg_85_59	emrB	fluoroquinolone		U00096:2812616-2814155
D050	ctg_1482_2	vanSC	glycopeptide	NG_051722.1			AY033764:4604-5662
D050	ctg_449_3	vanC2	glycopeptide	NG_048353.1			L29638:33-1085
D050	ctg_449_4	vanXYC	glycopeptide	NG_048509.1			EU151760:1078-1650
D050	ctg_449_5	vanTc3	glycopeptide	NG_048463.1			AY033764:1644-3746
D050	ctg_449_6	vanRC	glycopeptide	NG_048408.1			AY033764:3846-4541
D055	ctg_1_627	marA	MDR-RND		AP009048.1:1621288-1621672
D055	ctg_10_221	baeR	MDR-RND		AP009048.1:2166413-2167136
D055	ctg_10_224	mdtC	MDR-RND		U00096:2158386-2161464
D055	ctg_108_1	AAC(6')-Ib-cr	aminoglycoside	NG_052213.1	DQ303918:1-601	DQ303918
D055	ctg_108_2	arr-3	rifampicin	NG_048581.1	EU675686:1957-2410	JF806499	JF806499:1353-1805
D055	ctg_108_3	dfrA27	trimethoprim	NG_047723.1	KP076293.1:2348-2822	FJ459817	EU675686:2543-3016
D055	ctg_108_4	aadA16	aminoglycoside	NG_047339.1	EU675686:3197-4043	EU675686	EU675686:3197-4042
D055	ctg_119_1	tet(A)	tetracycline	NG_048153.1	AF534183.1:2971-4246	AJ517790	JX424423:94438-95712
D055	ctg_119_2	tetR	tetracycline				HF545434:53576-54226
D055	ctg_21_73	mdfA	MDR-RND			Y08743
D055	ctg_26_103	acrD	MDR-RND		AP009048.1:2586251-2589365
D055	ctg_27_150	emrR	fluoroquinolone		U00096.3:2810770-2811301
D055	ctg_33_83	fosA5	fosfomycin	NG_047881.1	KP143090.1:1200-1620	ACZD01000244	KP143090:1200-1619
D055	ctg_36_21	H-NS	MDR-other		BA000007.3:1737691-1738105
D055	ctg_36_69	oqxB	fluoroquinolone	NG_050439.1	EU370913.1:47851-51004	EU370913	EU370913:47851-51003
D055	ctg_36_70	oqxA	fluoroquinolone	NG_050427.1	EU370913.1:46652-47828	EU370913	EU370913:46652-47827
D055	ctg_40_35	cpxA	aminoglycoside		BA000007.3:4903689-4905063
D055	ctg_50_4	msbA	nitroimidazole		U00096.3:966621-968370
D055	ctg_8_199	arcA	MDR-RND		AJ318073.1:794-1991
D055	ctg_8_200	arcB	MDR-RND		U00096.3:481254-484404
D055	ctg_8_321	ampH	β-lactamase				CP003785:4208384-4209544
D055	ctg_8_362	blaCMY2	β-lactamase	NG_051160.1
D055	ctg_8_97	ramA	MDR-RND		JQ727668:1-376
D055	ctg_9_391	CRP	MDR-RND		AP009048.1:4153664-4154297
D055	ctg_99_2	qnrB17	fluoroquinolone	NG_050523.1	AM919398:1-682	EF523819	AM919398:1-681
D057	ctg_1_180	marA	MDR-RND		AP009048.1:1621288-1621672
D057	ctg_10_120	mdfA	MDR-RND			Y08743
D057	ctg_10_45	msbA	nitroimidazole		U00096.3:966621-968370
D057	ctg_14_91	emrR	fluoroquinolone		U00096.3:2810770-2811301
D057	ctg_157_10	qnrB17	fluoroquinolone	NG_050523.1	AM919398:1-682	EF523819	AM919398:1-681
D057	ctg_157_13	sul1	sulfonamide	NG_048082.1	JF969163:1054-1894	U12338	AF071413:6700-7539
D057	ctg_157_2	AAC(6')-Ib-cr	aminoglycoside	NG_052213.1	DQ303918:1-601	DQ303918
D057	ctg_157_3	arr-3	rifampicin	NG_048581.1	EU675686:1957-2410	JF806499	JF806499:1353-1805
D057	ctg_157_4	dfrA27	trimethoprim	NG_047723.1	KP076293.1:2348-2822	FJ459817	EU675686:2543-3016
D057	ctg_157_5	aadA16	aminoglycoside	NG_047339.1	EU675686:3197-4043	EU675686	EU675686:3197-4042
D057	ctg_157_7	sul1	sulfonamide	NG_048082.1	JF969163:1054-1894	U12338	AF071413:6700-7539
D057	ctg_17_30	fosA5	fosfomycin	NG_047881.1	KP143090.1:1200-1620	ACZD01000244	KP143090:1200-1619
D057	ctg_2_221	baeR	MDR-RND		AP009048.1:2166413-2167136
D057	ctg_2_224	mdtC	MDR-RND		U00096:2158386-2161464
D057	ctg_22_33	acrD	MDR-RND		AP009048.1:2586251-2589365
D057	ctg_3_437	CRP	MDR-RND		AP009048.1:4153664-4154297
D057	ctg_30_97	ramA	MDR-RND		JQ727668:1-376
D057	ctg_40_47	cpxA	aminoglycoside		BA000007.3:4903689-4905063
D057	ctg_6_220	ampH	β-lactamase				CP003785:4208384-4209544
D057	ctg_6_261	blaCMY2	β-lactamase	NG_051160.1
D057	ctg_6_98	arcA	MDR-RND		AJ318073.1:794-1991
D057	ctg_6_99	arcB	MDR-RND		U00096.3:481254-484404
D057	ctg_7_141	H-NS	MDR-other		BA000007.3:1737691-1738105
D057	ctg_7_189	oqxB	fluoroquinolone	NG_050439.1	EU370913.1:47851-51004	EU370913	EU370913:47851-51003
D057	ctg_7_190	oqxA	fluoroquinolone	NG_050427.1	EU370913.1:46652-47828	EU370913	EU370913:46652-47827
D062	ctg_12_32	CRP	MDR-RND		AP009048.1:4153664-4154297
D062	ctg_18_57	tolC	MDR-RND		FJ768952:1-1489
D062	ctg_18_72	bacA	peptide		U00096.3:3203310-3204132
D062	ctg_19_117	acrD	MDR-RND		AP009048.1:2586251-2589365
D062	ctg_23_4	msbA	nitroimidazole		U00096.3:966621-968370
D062	ctg_3_110	qnrB34	fluoroquinolone	NG_050496.1	JN173056:36-684	JN173056	JN173056:36-683
D062	ctg_3_308	marA	MDR-RND		AP009048.1:1621288-1621672
D062	ctg_3_46	H-NS	MDR-other		BA000007.3:1737691-1738105
D062	ctg_30_57	cpxA	aminoglycoside		BA000007.3:4903689-4905063
D062	ctg_37_92	emrR	fluoroquinolone		U00096.3:2810770-2811301
D062	ctg_37_93	emrA	fluoroquinolone		AP009048:2810083-2811256
D062	ctg_37_94	emrB	fluoroquinolone		U00096:2812616-2814155
D062	ctg_4_132	yojI	peptide		U00096.3:2306972-2308616
D062	ctg_4_278	baeR	MDR-RND		AP009048.1:2166413-2167136
D062	ctg_4_281	mdtC	MDR-RND		U00096:2158386-2161464
D062	ctg_4_282	mdtB	MDR-RND		U00096:2155263-2158386
D062	ctg_6_162	ampC	β-lactamase		AP012030.1:395554-396712		AP012030:395554-396711
D062	ctg_6_267	arcB	MDR-RND		U00096.3:481254-484404
D062	ctg_6_268	arcA	MDR-RND		U00096.3:484426-485620
D062	ctg_71_12	blaCMY-98	β-lactamase	NG_062243.1	KC603538:1-1132	KC603538	JX440350:1027-2172
D063	ctg_11_110	msbA	nitroimidazole		U00096.3:966621-968370
D063	ctg_11_181	mdfA	MDR-RND		JQ394987:1-1234	Y08743
D063	ctg_13_164	CRP	MDR-RND		AP009048.1:4153664-4154297
D063	ctg_13_2	gadX	MDR-RND		AP009048.1:3974605-3975430
D063	ctg_13_3	gadW	MDR-RND		CP015085.1:2551712-2552441
D063	ctg_13_5	mdtF	MDR-RND		U00096:3660414-3663528
D063	ctg_13_6	mdtE	MDR-RND		AP009048.1:3980026-3981184
D063	ctg_14_113	acrD	MDR-RND		AP009048.1:2586251-2589365
D063	ctg_14_144	ampC	β-lactamase		FN649414.1:2765051-2766356		FN649414:2765051-2766355
D063	ctg_18_119	emrE	MDR-SMR		Z11877.1:486-819
D063	ctg_19_27	emrR	fluoroquinolone		U00096.3:2810770-2811301
D063	ctg_19_28	emrA	fluoroquinolone		AP009048:2810083-2811256
D063	ctg_19_29	emrB	fluoroquinolone		U00096:2812616-2814155
D063	ctg_20_7	acrF	MDR-RND		U00096:3415033-3418138
D063	ctg_20_8	acrE	MDR-RND		U00096:3413864-3415022
D063	ctg_20_9	acrS	MDR-RND		U00096:3412803-3413466
D063	ctg_22_49	tolC	MDR-RND		FJ768952:1-1489
D063	ctg_22_69	bacA	peptide		U00096.3:3203310-3204132
D063	ctg_23_64	mdtM	MDR-RND		U00096.3:4567287-4568520
D063	ctg_28_26	cpxA	aminoglycoside		BA000007.3:4903689-4905063
D063	ctg_49_10	tet(A)	tetracycline	NG_048154.1	AF534183.1:2971-4246	AJ517790	JX424423:94438-95712
D063	ctg_49_3	qnrS1	fluoroquinolone	NG_050543.1	DQ485529.1:1-658	AB187515	AB187515:9737-10393
D063	ctg_49_9	tetR	tetracycline				HF545434:53576-54226
D063	ctg_5_126	pmrF	peptide		U00096:2367071-2368040
D063	ctg_5_158	yojI	peptide		U00096.3:2306972-2308616
D063	ctg_5_27	evgS	MDR-MFS		U00096:2484374-2487968
D063	ctg_5_28	evgA	MDR-MFS		BA000007.3:3212026-3212641
D063	ctg_5_284	baeR	MDR-RND		AP009048.1:2166413-2167136
D063	ctg_5_285	baeS	MDR-RND		AP009048:2165013-2166417
D063	ctg_5_287	mdtC	MDR-RND		U00096:2158386-2161464
D063	ctg_5_288	mdtB	MDR-RND		U00096:2155263-2158386
D063	ctg_5_289	mdtA	MDR-RND		U00096:2154016-2155264
D063	ctg_5_29	emrK	fluoroquinolone		D78168:537-1593
D063	ctg_5_30	emrY	fluoroquinolone		D78168:1592-3131
D063	ctg_5_337	ugd	peptide		U00096:2098447-2099614
D063	ctg_56_7	kdpE	aminoglycoside		U00096.3:721056-721734
D063	ctg_6_42	marA	MDR-RND		AP009048.1:1621288-1621672
D063	ctg_7_173	H-NS	MDR-other		BA000007.3:1737691-1738105
D063	ctg_7_322	mdtH	MDR-RND		U00096:1124118-1125327
D063	ctg_7_334	mdtG	MDR-RND		CP000800.1:1191728-1192955
D063	ctg_8_124	ampC	β-lactamase		AP012030.1:395554-396712		AP012030:395554-396711
D063	ctg_8_35	arcA	MDR-RND		U00096.3:484426-485620
D063	ctg_8_36	arcB	MDR-RND		U00096.3:481254-484404
D063	ctg_81_2	dfrA14	trimethoprim	NG_056035.1	EU780012:2163-2646	KF921535	GU726917:72-545
D063	ctg_9_133	eptA	peptide		AP009048:4338625-4340269
D063	ctg_9_160	mdtN	MDR-RND		AP009048.1:4306557-4307589
D063	ctg_9_161	mdtO	MDR-RND		AP009048.1:4304506-4306558
D063	ctg_9_162	mdtP	MDR-RND		AP009048.1:4303043-4304510
D063	ctg_9_95	ampC	β-lactamase	NG_049079.1	NC_000913.3:4377811-4378945		CP002970:332756-333889
D070	ctg_1_59	lsaA	MDR-MFS	NG_047931.1	AY225127.1:41-1538	AY225127	AY225127:41-1537
D070	ctg_11_19	dfrG	trimethoprim	NG_047756.1	AB205645:1013-1511	AB205645	AB205645:1013-1510
D070	ctg_197_3	APH(3')-IIIa	aminoglycoside	NG_047418.1	CP004067:52915-53710	M26832	V01547:535-1329
D070	ctg_197_4	sat4	aminoglycoside	NG_048072.1	U01945:374-917		X92945:38870-39412
D070	ctg_197_5	aad(6)	aminoglycoside		AY712687:1-832
D070	ctg_22_22	dfrE	trimethoprim	NG_055770.1	AIIS01000002.1:233813-234308		NG_055770:101-595
D070	ctg_67_25	efrB	MDR-ABC		HG970103.1:1-1087
D070	ctg_67_26	efrA	MDR-ABC		HG970100.1:1-1458
D070	ctg_7_8	emeA	MDR-MATE		AB091338:174-1356
D070	ctg_75_6	mphD	macrolide				NC_017312:2291580-2292413
D070	ctg_9_88	tetM	tetracycline	NG_048247.1	AM990992.1:1001761-1003681	EU182585	DQ534550:1451-3370
D074	ctg_9_48	qnrVC6	fluoroquinolone	NG_050555.1	KC202804:3875-4532	KC202804	KC202804:3875-4531
D084	ctg_11_138	vanXYC	glycopeptide	NG_048503.1	AF162694:2439-3012		DQ022190:1233-1805
D084	ctg_11_139	vanTC	glycopeptide	NG_048458.1	AF162694:3008-5105		DQ022190:1802-3898
D084	ctg_11_140	vanRC	glycopeptide	NG_048404.1	AF162694:5193-5889		AF162694:5193-5888
D084	ctg_11_141	vanSC	glycopeptide	NG_048443.1	AF162694:5878-6964		DQ022190:4672-5757
D084	ctg_15_53	tetO	tetracycline	NG_048264.1	M18896.2:207-2127	M18896	M18896:207-2126
D097	ctg_21_211	CRP	MDR-RND		AP009048.1:4153664-4154297
D097	ctg_9_19	catA2	phenicol	NG_047596.1	X53796.1:187-829	X53796	X53796:187-903
D105	ctg_1_48	mphD	macrolide				NC_017312:2291580-2292413
D105	ctg_1_567	lsaA	MDR-MFS	NG_047931.1	AY225127.1:41-1538	AY225127	AY225127:41-1537
D105	ctg_2_25	emeA	MDR-MATE		AB091338:174-1356
D105	ctg_2_443	dfrE	trimethoprim	NG_055770.1	AIIS01000002.1:233813-234308		NG_055770:101-595
D105	ctg_3_88	tetM	tetracycline	NG_048247.1	AM990992.1:1001761-1003681	EU182585	DQ534550:1451-3370
D105	ctg_4_371	efrA	MDR-ABC		HG970100.1:1-1458
D105	ctg_4_372	efrB	MDR-ABC		HG970103.1:1-1087
D105	ctg_4_42	dfrG	trimethoprim	NG_047756.1	AB205645:1013-1511	AB205645	AB205645:1013-1510
D105	ctg_76_1	aad(6)	aminoglycoside		AY712687:1-832
D105	ctg_76_2	sat4	aminoglycoside	NG_048072.1	U01945:374-917		X92945:38870-39412
D105	ctg_76_3	APH(3')-IIIa	aminoglycoside	NG_047418.1	CP004067:52915-53710	M26832	V01547:535-1329
D107	ctg_1_10	mphD	macrolide				NC_017312:2291580-2292413
D107	ctg_1_367	dfrE	trimethoprim	NG_055770.1	AIIS01000002.1:233813-234308		NG_055770:101-595
D107	ctg_199_10	tetM	tetracycline	NG_048233.1	AM990992.1:1001761-1003681	EU182585	DQ534550:1451-3370
D107	ctg_199_9	tet(L)	tetracycline	NG_048203.1	M11036:1-1378	M29725	FN435329:1-1377
D107	ctg_29_96	emeA	MDR-MATE		AB091338:174-1356
D107	ctg_3_449	lsaA	MDR-MFS	NG_047932.1	AY225127.1:41-1538	AY737526	AY225127:41-1537
D107	ctg_303_2	fexA	phenicol	NG_047857.1	AJ549214:177-1605	AJ549214	JQ041372:14024-15451
D107	ctg_303_4	optrA	oxazolidinone	NG_048023.1	KP399637:31477-33445	KT862777	KX620940:1-1968
D107	ctg_303_6	erm(A)	MDR-MFS	NG_047791.1	X03216.1:4551-5283	EU348758	X03216:4551-5282
D107	ctg_50_34	efrA	MDR-ABC		HG970100.1:1-1458
D107	ctg_50_35	efrB	MDR-ABC		HG970103.1:1-1087
D107	ctg_532_1	dfrG	trimethoprim	NG_047756.1	AB205645:1013-1511	AB205645	AB205645:1013-1510
D111	ctg_10_287	H-NS	MDR-other		BA000007.3:1737691-1738105
D111	ctg_13_310	CRP	MDR-RND		AP009048.1:4153664-4154297
D111	ctg_15_12	fosA5	fosfomycin	NG_047881.1	KP143090.1:1200-1620	ACZD01000244	KP143090:1200-1619
D111	ctg_18_224	baeR	MDR-RND		AP009048.1:2166413-2167136
D111	ctg_18_227	mdtC	MDR-RND		U00096:2158386-2161464
D111	ctg_18_228	mdtB	MDR-RND		U00096:2155263-2158386
D111	ctg_19_113	marA	MDR-RND		AP009048.1:1621288-1621672
D111	ctg_19_93	blaSHV-106	β-lactamase	NG_062284.1	AM941847:1-862	AM922307	AM941847:1-861
D111	ctg_21_159	arcB	MDR-RND		U00096.3:481254-484404
D111	ctg_21_160	arcA	MDR-RND		AJ318073.1:794-1991
D111	ctg_21_33	ampH	β-lactamase				CP003785:4208384-4209544
D111	ctg_22_191	ramA	MDR-RND		JQ727668:1-376
D111	ctg_26_106	acrD	MDR-RND		AP009048.1:2586251-2589365
D111	ctg_40_57	cpxA	aminoglycoside		BA000007.3:4903689-4905063
D111	ctg_46_11	emrR	fluoroquinolone		U00096.3:2810770-2811301
D111	ctg_46_53	oqxB	fluoroquinolone	NG_050435.1	EU370913.1:47851-51004	EU370913	EU370913:47851-51003
D111	ctg_46_54	oqxA	fluoroquinolone	NG_050418.1	EU370913.1:46652-47828	EU370913	EU370913:46652-47827
D111	ctg_6_422	msbA	nitroimidazole		U00096.3:966621-968370
D111	ctg_94_3	sul2	sulfonamide	NG_048118.1	AY055428.1:20269-21085	HQ840942	EU360945:1617-2432
D111	ctg_94_4	APH(3'')-Ib	aminoglycoside	NG_047413.1	AF313472:15594-16398	AF321551	AB366441:22458-23261
D113	ctg_100_1	APH(6)-Id	aminoglycoside	NG_047464.1	AF024602:3156-3993	M28829	FJ474091:264-1100
D113	ctg_100_2	APH(3'')-Ib	aminoglycoside	NG_047413.1	AF313472:15594-16398	AF321551	AB366441:22458-23261
D113	ctg_100_3	sul2	sulfonamide	NG_048118.1	AY055428.1:20269-21085	HQ840942	EU360945:1617-2432
D113	ctg_103_1	fosA3	fosfomycin	NG_050407.1	JF411006:952-1369	AB522970	JQ343850:4619-5035
D113	ctg_108_2	tetR	tetracycline				HF545434:53576-54226
D113	ctg_108_3	tet(A)	tetracycline	NG_048153.1	AF534183.1:2971-4246	AJ517790	JX424423:94438-95712
D113	ctg_109_1	blaCTX-M-3	β-lactamase	NG_048979.1	Y10278:1-877	Y10278	Y10278:1-876
D113	ctg_112_2	catA1	phenicol	NG_047582.1	KF030445.1:23980-24640	V00622	V00622:244-903
D113	ctg_118_1	AAC(6')-Ib-cr	aminoglycoside	NG_051711.1	DQ303918:1-601	DQ303918
D113	ctg_118_2	arr-3	rifampicin	NG_048581.1	EU675686:1957-2410	JF806499	JF806499:1353-1805
D113	ctg_121_1	blaTEM-1	β-lactamase	NG_050145.1	AL513383:161911-162772	AY458016	AF516720:215-1075
D113	ctg_127_1	APH(3')-Ia	aminoglycoside	NG_047430.1	BX664015.1:103018-103834	V00359	HQ840942:23569-24384
D113	ctg_13_32	CRP	MDR-RND		AP009048.1:4153664-4154297
D113	ctg_133_1	sul1	sulfonamide	NG_048089.1	JF969163:1054-1894		AF071413:6700-7539
D113	ctg_148_1	dfrA7	trimethoprim	NG_047737.1	FJ854362:2339-2813	AB161450	X58425:594-1067
D113	ctg_17_220	bacA	peptide		U00096.3:3203310-3204132
D113	ctg_17_235	tolC	MDR-RND		FJ768952:1-1489
D113	ctg_29_35	acrD	MDR-RND		AP009048.1:2586251-2589365
D113	ctg_32_102	msbA	nitroimidazole		U00096.3:966621-968370
D113	ctg_35_66	cpxA	aminoglycoside		BA000007.3:4903689-4905063
D113	ctg_4_110	qnrB34	fluoroquinolone	NG_050496.1	JN173056:36-684	JN173056	JN173056:36-683
D113	ctg_4_308	marA	MDR-RND		AP009048.1:1621288-1621672
D113	ctg_4_46	H-NS	MDR-other		BA000007.3:1737691-1738105
D113	ctg_40_6	emrB	fluoroquinolone		U00096:2812616-2814155
D113	ctg_40_7	emrA	fluoroquinolone		AP009048:2810083-2811256
D113	ctg_40_8	emrR	fluoroquinolone		U00096.3:2810770-2811301
D113	ctg_5_406	arcA	MDR-RND		U00096.3:484426-485620
D113	ctg_5_407	arcB	MDR-RND		U00096.3:481254-484404
D113	ctg_5_512	ampC	β-lactamase		AP012030.1:395554-396712		AP012030:395554-396711
D113	ctg_6_132	yojI	peptide		U00096.3:2306972-2308616
D113	ctg_6_278	baeR	MDR-RND		AP009048.1:2166413-2167136
D113	ctg_6_281	mdtC	MDR-RND		U00096:2158386-2161464
D113	ctg_6_282	mdtB	MDR-RND		U00096:2155263-2158386
D113	ctg_62_19	blaCMY-98	β-lactamase	NG_062243.1	KC603538:1-1132	KC603538	JX440350:1027-2172
D113	ctg_99_3	floR	phenicol	NG_047877.1	AF231986:3308-4523	AF118107	AKLJ01000508:383-1597
D118	ctg_14_117	acrD	MDR-RND		AP009048.1:2586251-2589365
D118	ctg_2_109	qnrB34	fluoroquinolone	NG_050496.1	JN173056:36-684	JN173056	JN173056:36-683
D118	ctg_2_307	marA	MDR-RND		AP009048.1:1621288-1621672
D118	ctg_2_45	H-NS	MDR-other		BA000007.3:1737691-1738105
D118	ctg_21_92	emrR	fluoroquinolone		U00096.3:2810770-2811301
D118	ctg_21_93	emrA	fluoroquinolone		AP009048:2810083-2811256
D118	ctg_21_94	emrB	fluoroquinolone		U00096:2812616-2814155
D118	ctg_27_18	msbA	nitroimidazole		U00096.3:966621-968370
D118	ctg_28_66	cpxA	aminoglycoside		BA000007.3:4903689-4905063
D118	ctg_4_132	yojI	peptide		U00096.3:2306972-2308616
D118	ctg_4_278	baeR	MDR-RND		AP009048.1:2166413-2167136
D118	ctg_4_281	mdtC	MDR-RND		U00096:2158386-2161464
D118	ctg_4_282	mdtB	MDR-RND		U00096:2155263-2158386
D118	ctg_5_192	arcB	MDR-RND		U00096.3:481254-484404
D118	ctg_5_193	arcA	MDR-RND		U00096.3:484426-485620
D118	ctg_5_87	ampC	β-lactamase		AP012030.1:395554-396712		AP012030:395554-396711
D118	ctg_6_1	sul1	sulfonamide	NG_048089.1	JF969163:1054-1894		AF071413:6700-7539
D118	ctg_6_288	CRP	MDR-RND		AP009048.1:4153664-4154297
D118	ctg_6_3	dfrA7	trimethoprim	NG_047737.1	FJ854362:2339-2813	AB161450	X58425:594-1067
D118	ctg_9_57	tolC	MDR-RND		FJ768952:1-1489
D118	ctg_9_72	bacA	peptide		U00096.3:3203310-3204132
D118	ctg_99_12	blaCMY-98	β-lactamase	NG_062243.1	KC603538:1-1132	KC603538	JX440350:1027-2172
D119	ctg_101_35	acrD	MDR-RND		AP009048.1:2586251-2589365
D119	ctg_109_14	CRP	MDR-RND		AP009048.1:4153664-4154297
D119	ctg_12_286	mdtB	MDR-RND		U00096:2155263-2158386
D119	ctg_12_287	mdtC	MDR-RND		U00096:2158386-2161464
D119	ctg_12_290	baeR	MDR-RND		AP009048.1:2166413-2167136
D119	ctg_15_164	ampC	β-lactamase		AP012030.1:395554-396712		AP012030:395554-396711
D119	ctg_151_11	blaCMY-98	β-lactamase	NG_062243.1	KC603538:1-1132	KC603538	JX440350:1027-2172
D119	ctg_17_144	yojI	peptide		U00096.3:2306972-2308616
D119	ctg_19_30	arcB	MDR-RND		U00096.3:481254-484404
D119	ctg_19_31	arcA	MDR-RND		U00096.3:484426-485620
D119	ctg_217_8	H-NS	MDR-other		BA000007.3:1737691-1738105
D119	ctg_39_9	pmrF	peptide		U00096:2367071-2368040
D119	ctg_44_102	msbA	nitroimidazole		U00096.3:966621-968370
D119	ctg_46_17	bacA	peptide		U00096.3:3203310-3204132
D119	ctg_46_32	tolC	MDR-RND		FJ768952:1-1489
D119	ctg_5_260	marA	MDR-RND		AP009048.1:1621288-1621672
D119	ctg_5_62	qnrB34	fluoroquinolone	NG_050496.1	JN173056:36-684	JN173056	JN173056:36-683
D119	ctg_56_6	emrB	fluoroquinolone		U00096:2812616-2814155
D119	ctg_56_7	emrA	fluoroquinolone		AP009048:2810083-2811256
D119	ctg_56_8	emrR	fluoroquinolone		U00096.3:2810770-2811301
D119	ctg_60_57	cpxA	aminoglycoside		BA000007.3:4903689-4905063
D122	ctg_2_1252	lsaA	MDR-MFS	NG_047932.1	AY225127.1:41-1538	AY737526	AY225127:41-1537
D122	ctg_2_25	emeA	MDR-MATE		AB091338:174-1356
D122	ctg_2_438	dfrE	trimethoprim	NG_055770.1	AIIS01000002.1:233813-234308		NG_055770:101-595
D122	ctg_2_795	mphD	macrolide				NC_017312:2291580-2292413
D122	ctg_52_25	efrB	MDR-ABC		HG970103.1:1-1087
D122	ctg_52_26	efrA	MDR-ABC		HG970100.1:1-1458
D122	ctg_74_2	tetM	tetracycline	NG_048233.1	AM990992.1:1001761-1003681	EU182585	DQ534550:1451-3370
D122	ctg_74_3	tet(L)	tetracycline	NG_048203.1	M11036:1-1378	M29725	FN435329:1-1377
D122	ctg_78_1	erm(A)	MDR-MFS	NG_047791.1	X03216.1:4551-5283	EU348758	X03216:4551-5282
D122	ctg_78_3	optrA	oxazolidinone	NG_048023.1	KP399637:31477-33445	KT862777	KX620940:1-1968
D122	ctg_78_5	fexA	phenicol	NG_047857.1	AJ549214:177-1605	AJ549214	JQ041372:14024-15451
D122	ctg_86_1	dfrG	trimethoprim	NG_047756.1	AB205645:1013-1511	AB205645	AB205645:1013-1510
D129	ctg_10_47	ampC	β-lactamase		AP012030.1:395554-396712		AP012030:395554-396711
D129	ctg_113_12	blaCMY-98	β-lactamase	NG_062243.1	KC603538:1-1132	KC603538	JX440350:1027-2172
D129	ctg_17_118	acrD	MDR-RND		AP009048.1:2586251-2589365
D129	ctg_20_65	emrB	fluoroquinolone		U00096:2812616-2814155
D129	ctg_20_66	emrA	fluoroquinolone		AP009048:2810083-2811256
D129	ctg_20_67	emrR	fluoroquinolone		U00096.3:2810770-2811301
D129	ctg_208_2	qnrB34	fluoroquinolone	NG_050496.1	JN173056:36-684	JN173056	JN173056:36-683
D129	ctg_26_17	marA	MDR-RND		AP009048.1:1621288-1621672
D129	ctg_3_165	mdtB	MDR-RND		U00096:2155263-2158386
D129	ctg_3_166	mdtC	MDR-RND		U00096:2158386-2161464
D129	ctg_3_169	baeR	MDR-RND		AP009048.1:2166413-2167136
D129	ctg_3_315	yojI	peptide		U00096.3:2306972-2308616
D129	ctg_30_46	H-NS	MDR-other		BA000007.3:1737691-1738105
D129	ctg_31_52	cpxA	aminoglycoside		BA000007.3:4903689-4905063
D129	ctg_38_4	msbA	nitroimidazole		U00096.3:966621-968370
D129	ctg_4_32	CRP	MDR-RND		AP009048.1:4153664-4154297
D129	ctg_40_18	bacA	peptide		U00096.3:3203310-3204132
D129	ctg_40_33	tolC	MDR-RND		FJ768952:1-1489
D129	ctg_68_1	arcA	MDR-RND		U00096.3:484426-485620
D129	ctg_68_2	arcB	MDR-RND		U00096.3:481254-484404
D130	ctg_1_1078	mdtC	MDR-RND		U00096:2158386-2161464
D130	ctg_1_1081	baeR	MDR-RND		AP009048.1:2166413-2167136
D130	ctg_1_179	marA	MDR-RND		AP009048.1:1621288-1621672
D130	ctg_12_30	fosA5	fosfomycin	NG_047881.1	KP143090.1:1200-1620	ACZD01000244	KP143090:1200-1619
D130	ctg_15_103	acrD	MDR-RND		AP009048.1:2586251-2589365
D130	ctg_16_35	cpxA	aminoglycoside		BA000007.3:4903689-4905063
D130	ctg_29_10	qnrB17	fluoroquinolone	NG_050523.1	AM919398:1-682	EF523819	AM919398:1-681
D130	ctg_29_13	sul1	sulfonamide	NG_048082.1	JF969163:1054-1894	U12338	AF071413:6700-7539
D130	ctg_29_2	AAC(6')-Ib-cr	aminoglycoside	NG_052213.1	DQ303918:1-601	DQ303918
D130	ctg_29_3	arr-3	rifampicin	NG_048581.1	EU675686:1957-2410	JF806499	JF806499:1353-1805
D130	ctg_29_4	dfrA27	trimethoprim	NG_047723.1	KP076293.1:2348-2822	FJ459817	EU675686:2543-3016
D130	ctg_29_5	aadA16	aminoglycoside	NG_047339.1	EU675686:3197-4043	EU675686	EU675686:3197-4042
D130	ctg_29_7	sul1	sulfonamide	NG_048082.1	JF969163:1054-1894	U12338	AF071413:6700-7539
D130	ctg_3_111	mdfA	MDR-RND			Y08743
D130	ctg_3_186	msbA	nitroimidazole		U00096.3:966621-968370
D130	ctg_3_482	oqxA	fluoroquinolone	NG_050427.1	EU370913.1:46652-47828	EU370913	EU370913:46652-47827
D130	ctg_3_483	oqxB	fluoroquinolone	NG_050439.1	EU370913.1:47851-51004	EU370913	EU370913:47851-51003
D130	ctg_3_531	H-NS	MDR-other		BA000007.3:1737691-1738105
D130	ctg_4_583	emrR	fluoroquinolone		U00096.3:2810770-2811301
D130	ctg_7_214	arcB	MDR-RND		U00096.3:481254-484404
D130	ctg_7_215	arcA	MDR-RND		AJ318073.1:794-1991
D130	ctg_7_317	ramA	MDR-RND		JQ727668:1-376
D130	ctg_7_52	blaCMY2	β-lactamase	NG_051160.1
D130	ctg_7_93	ampH	β-lactamase				CP003785:4208384-4209544
D130	ctg_8_437	CRP	MDR-RND		AP009048.1:4153664-4154297
D131	ctg_7_420	vanC1	glycopeptide	NG_048343.1	AF162694:1411-2443		AF162694:1411-2442
D131	ctg_7_421	vanXYC	glycopeptide	NG_048503.1	AF162694:2439-3012		DQ022190:1233-1805
D131	ctg_7_422	vanTC	glycopeptide	NG_048454.1	AF162694:3008-5105		AF162694:3008-5104
D131	ctg_7_423	vanRC	glycopeptide	NG_048404.1	AF162694:5193-5889		AF162694:5193-5888
D131	ctg_7_424	vanSC	glycopeptide	NG_048430.1	AF162694:5878-6964		DQ022190:4672-5757
D135	ctg_18_231	CRP	MDR-RND		AP009048.1:4153664-4154297
D135	ctg_26_182	lnuF	MDR-MFS	NG_051889.1	AJ561197:1321-2143	AJ561197	EU118119:1030-1851
D135	ctg_26_183	dfrA1	trimethoprim	NG_047676.1	KJ541681.1:19527-20001	X00926	JQ794607:474
D135	ctg_26_184	aadA1	aminoglycoside	NG_047324.1			JQ690540:7968-8798
D135	ctg_30_134	tet(57)	tetracycline	NG_056039.1		KP137702	NG_056039:1-1197

## Sheet: ST4
Table S4| Detailed information of the virulence factors of the bile species.
Strain ID	Gene ID	VFDB name	VFDB accession	Description
D008	ctg_37_49	ompA	AAF37887	OmpA (VF0236)
D008	ctg_51_75	yagV/ecpE	NP_286006	ECP (VF0404)
D008	ctg_51_76	yagW/ecpD	NP_286007	ECP (VF0404)
D008	ctg_51_77	yagX/ecpC	NP_286008	ECP (VF0404)
D008	ctg_51_78	yagY/ecpB	NP_286009	ECP (VF0404)
D008	ctg_51_79	yagZ/ecpA	NP_286010	ECP (VF0404)
D008	ctg_51_80	ykgK/ecpR	NP_286011	ECP (VF0404)
D008	ctg_74_30	fepC	NP_752606	Enterobactin (VF0228)
D008	ctg_74_37	entB	NP_752613	Enterobactin (VF0228)
D008	ctg_74_38	entA	NP_752614	Enterobactin (VF0228)
D028	ctg_11_177	iroN	NP_753164	IroN (VF0230)
D028	ctg_11_181	iroB	NP_753168	Salmochelin (IA013)
D028	ctg_14_177	entB	NP_752613	Enterobactin (VF0228)
D028	ctg_14_178	entA	NP_752614	Enterobactin (VF0228)
D028	ctg_25_72	yagZ/ecpA	NP_286010	ECP (VF0404)
D028	ctg_7_154	csgG	NP_460110	Agf (VF0103)
D028	ctg_7_155	csgF	NP_460111	Agf (VF0103)
D028	ctg_7_156	csgE	NP_460112	Agf (VF0103)
D028	ctg_7_157	csgD	NP_460113	curli fibers/thin aggregative fimbriae (AGF) (AI094)
D028	ctg_7_158	csgB	NP_460114	Agf (VF0103)
D028	ctg_7_47	flgH	YP_001006758	Flagella (VF0394)
D028	ctg_7_68	fliN	YP_001006749	Flagella (VF0394)
D028	ctg_7_69	fliM	YP_001006748	Flagella (VF0394)
D028	ctg_7_75	fliG	YP_001006742	Flagella (VF0394)
D028	ctg_87_39	ompA	AAF37887	OmpA (VF0236)
D036	ctg_2_10	yagV/ecpE	NP_286006	ECP (VF0404)
D036	ctg_2_331	fepC	NP_752606	Enterobactin (VF0228)
D036	ctg_2_338	entB	NP_752613	Enterobactin (VF0228)
D036	ctg_2_339	entA	NP_752614	Enterobactin (VF0228)
D036	ctg_2_5	ykgK/ecpR	NP_286011	ECP (VF0404)
D036	ctg_2_6	yagZ/ecpA	NP_286010	ECP (VF0404)
D036	ctg_2_7	yagY/ecpB	NP_286009	ECP (VF0404)
D036	ctg_2_8	yagX/ecpC	NP_286008	ECP (VF0404)
D036	ctg_2_9	yagW/ecpD	NP_286007	ECP (VF0404)
D036	ctg_6_170	ompA	AAF37887	OmpA (VF0236)
D044	ctg_10_116	fss1	NP_813892	Fibrinogen binding protein (AI271)
D044	ctg_13_28	EF0485	NP_814266	AS (VF0352)
D044	ctg_2_318	efaA	NP_815739	EfaA (VF0354)
D044	ctg_2_551	cpsK	NP_816131	Capsule (VF0361)
D044	ctg_2_552	cpsJ	NP_816132	Capsule (VF0361)
D044	ctg_2_553	cpsI	NP_816133	Capsule (VF0361)
D044	ctg_2_554	cpsH	NP_816134	Capsule (VF0361)
D044	ctg_2_555	cpsG	NP_816135	Capsule (VF0361)
D044	ctg_2_556	cpsF	NP_816136	Capsule (VF0361)
D044	ctg_2_557	cpsE	NP_816137	Capsule (VF0361)
D044	ctg_2_558	cpsD	NP_816138	Capsule (VF0361)
D044	ctg_2_559	cpsC	NP_816139	Capsule (VF0361)
D044	ctg_2_560	cpsB	NP_816140	Capsule (VF0361)
D044	ctg_2_561	cpsA	NP_816141	Capsule (VF0361)
D044	ctg_2_570	fss2	NP_816151	Fibrinogen binding protein (AI272)
D044	ctg_34_2	cylR2	AAM75247	Cytolysin (VF0356)
D044	ctg_34_3	cylR1	AAM75248	Cytolysin (VF0356)
D044	ctg_34_4	cylL	AAM75249	Cytolysin (VF0356)
D044	ctg_34_5	cylS	AAM75250	Cytolysin (VF0356)
D044	ctg_34_6	cylM	AAM75251	Cytolysin (VF0356)
D044	ctg_34_7	cylB	AAM75252	Cytolysin (VF0356)
D044	ctg_34_8	cylA	AAM75253	Cytolysin (VF0356)
D044	ctg_5_36	ebpA	NP_814821	Ebp pili (VF0538)
D044	ctg_5_37	ebpB	NP_814822	Ebp pili (VF0538)
D044	ctg_5_38	ebpC	NP_814823	Ebp pili (VF0538)
D044	ctg_5_39	srtC	NP_814824	Ebp pili (VF0538)
D044	ctg_6_361	bopD	NP_814691	BopD (VF0362)
D044	ctg_9_286	EF3023	NP_816637	Hyaluronidase (VF0359)
D049	ctg_107_20	fimH	NP_757248	Type 1 fimbriae (VF0221)
D049	ctg_107_21	fimG	NP_757247	Type 1 fimbriae (VF0221)
D049	ctg_107_22	fimF	NP_757245	Type 1 fimbriae (VF0221)
D049	ctg_107_23	fimD	NP_757244	Type 1 fimbriae (VF0221)
D049	ctg_107_24	fimC	NP_757243	Type 1 fimbriae (VF0221)
D049	ctg_107_25	fimI	NP_757242	Type 1 fimbriae (VF0221)
D049	ctg_107_26	fimA	NP_757241	Type 1 fimbriae (VF0221)
D049	ctg_107_27	fimE	NP_757240	Type 1 fimbriae (VF0221)
D049	ctg_107_28	fimB	NP_757239	Type 1 fimbriae (VF0221)
D049	ctg_10_42	ompA	AAF37887	OmpA (VF0236)
D049	ctg_114_24	espL4	NP_290644	LEE encoded T3SS (SS020)
D049	ctg_121_9	espX1	NP_285716	LEE encoded T3SS (SS020)
D049	ctg_30_109	espY1	NP_285753	LEE encoded T3SS (SS020)
D049	ctg_32_80	espX5	NP_290699	LEE encoded T3SS (SS020)
D049	ctg_49_5	csgG	NP_460110	Agf (VF0103)
D049	ctg_49_6	csgF	NP_460111	Agf (VF0103)
D049	ctg_49_8	csgD	NP_460113	curli fibers/thin aggregative fimbriae (AGF) (AI094)
D049	ctg_49_9	csgB	NP_460114	Agf (VF0103)
D049	ctg_59_47	aslA	AAG10151	AslA (VF0238)
D049	ctg_66_69	entA	NP_752614	Enterobactin (VF0228)
D049	ctg_66_70	entB	NP_752613	Enterobactin (VF0228)
D049	ctg_66_71	entE	NP_752612	Enterobactin (VF0228)
D049	ctg_66_72	entC	NP_752611	Enterobactin (VF0228)
D049	ctg_66_73	fepB	NP_752610	Enterobactin (VF0228)
D049	ctg_66_74	entS	NP_752609	enterobactin (IA019)
D049	ctg_66_75	fepD	NP_752608	Enterobactin (VF0228)
D049	ctg_66_76	fepG	NP_752607	Enterobactin (VF0228)
D049	ctg_66_77	fepC	NP_752606	Enterobactin (VF0228)
D049	ctg_66_79	entF	NP_752604	Enterobactin (VF0228)
D049	ctg_66_81	fes	NP_752602	enterobactin (IA019)
D049	ctg_66_82	fepA	NP_752600	Enterobactin (VF0228)
D049	ctg_66_83	entD	NP_752599	Enterobactin (VF0228)
D049	ctg_70_27	fdeC	YP_002390132	FdeC (VF0506)
D049	ctg_70_31	ykgK/ecpR	NP_286011	ECP (VF0404)
D049	ctg_70_32	yagZ/ecpA	NP_286010	ECP (VF0404)
D049	ctg_70_33	yagY/ecpB	NP_286009	ECP (VF0404)
D049	ctg_70_34	yagX/ecpC	NP_286008	ECP (VF0404)
D049	ctg_70_35	yagW/ecpD	NP_286007	ECP (VF0404)
D049	ctg_70_36	yagV/ecpE	NP_286006	ECP (VF0404)
D055	ctg_15_62	iroB	NP_753168	Salmochelin (IA013)
D055	ctg_15_66	iroN	NP_753164	IroN (VF0230)
D055	ctg_25_47	flgH	YP_001006758	Flagella (VF0394)
D055	ctg_25_68	fliN	YP_001006749	Flagella (VF0394)
D055	ctg_25_69	fliM	YP_001006748	Flagella (VF0394)
D055	ctg_25_75	fliG	YP_001006742	Flagella (VF0394)
D055	ctg_50_39	ompA	AAF37887	OmpA (VF0236)
D055	ctg_8_342	yagZ/ecpA	NP_286010	ECP (VF0404)
D055	ctg_8_57	entA	NP_752614	Enterobactin (VF0228)
D055	ctg_8_58	entB	NP_752613	Enterobactin (VF0228)
D057	ctg_10_10	ompA	AAF37887	OmpA (VF0236)
D057	ctg_27_50	fliG	YP_001006742	Flagella (VF0394)
D057	ctg_27_56	fliM	YP_001006748	Flagella (VF0394)
D057	ctg_27_57	fliN	YP_001006749	Flagella (VF0394)
D057	ctg_27_78	flgH	YP_001006758	Flagella (VF0394)
D057	ctg_30_57	entA	NP_752614	Enterobactin (VF0228)
D057	ctg_30_58	entB	NP_752613	Enterobactin (VF0228)
D057	ctg_4_235	iroN	NP_753164	IroN (VF0230)
D057	ctg_4_239	iroB	NP_753168	Salmochelin (IA013)
D057	ctg_6_241	yagZ/ecpA	NP_286010	ECP (VF0404)
D062	ctg_14_287	east1	AHY03744	EAST1 (VF0188)
D062	ctg_23_111	csgG	NP_460110	Agf (VF0103)
D062	ctg_23_112	csgF	NP_460111	Agf (VF0103)
D062	ctg_23_113	csgE	NP_460112	Agf (VF0103)
D062	ctg_23_114	csgD	NP_460113	curli fibers/thin aggregative fimbriae (AGF) (AI094)
D062	ctg_23_115	csgB	NP_460114	Agf (VF0103)
D062	ctg_23_40	ompA	AAF37887	OmpA (VF0236)
D062	ctg_6_380	fepC	NP_752606	Enterobactin (VF0228)
D062	ctg_6_381	fepG	NP_752607	Enterobactin (VF0228)
D062	ctg_6_386	entE	NP_752612	Enterobactin (VF0228)
D062	ctg_6_387	entB	NP_752613	Enterobactin (VF0228)
D062	ctg_6_388	entA	NP_752614	Enterobactin (VF0228)
D063	ctg_11_67	ompA	AAF37887	OmpA (VF0236)
D063	ctg_12_174	espX1	NP_285716	LEE encoded T3SS (SS020)
D063	ctg_23_37	fimB	NP_757239	Type 1 fimbriae (VF0221)
D063	ctg_23_38	fimE	NP_757240	Type 1 fimbriae (VF0221)
D063	ctg_23_39	fimA	NP_757241	Type 1 fimbriae (VF0221)
D063	ctg_23_40	fimI	NP_757242	Type 1 fimbriae (VF0221)
D063	ctg_23_41	fimC	NP_757243	Type 1 fimbriae (VF0221)
D063	ctg_23_42	fimD	NP_757244	Type 1 fimbriae (VF0221)
D063	ctg_23_43	fimF	NP_757245	Type 1 fimbriae (VF0221)
D063	ctg_23_44	fimG	NP_757247	Type 1 fimbriae (VF0221)
D063	ctg_23_45	fimH	NP_757248	Type 1 fimbriae (VF0221)
D063	ctg_24_85	entA	NP_752614	Enterobactin (VF0228)
D063	ctg_24_86	entB	NP_752613	Enterobactin (VF0228)
D063	ctg_24_87	entE	NP_752612	Enterobactin (VF0228)
D063	ctg_24_88	entC	NP_752611	Enterobactin (VF0228)
D063	ctg_24_89	fepB	NP_752610	Enterobactin (VF0228)
D063	ctg_24_90	entS	NP_752609	enterobactin (IA019)
D063	ctg_24_91	fepD	NP_752608	Enterobactin (VF0228)
D063	ctg_24_92	fepG	NP_752607	Enterobactin (VF0228)
D063	ctg_24_93	fepC	NP_752606	Enterobactin (VF0228)
D063	ctg_24_95	entF	NP_752604	Enterobactin (VF0228)
D063	ctg_24_97	fes	NP_752602	enterobactin (IA019)
D063	ctg_24_98	fepA	NP_752600	Enterobactin (VF0228)
D063	ctg_25_81	gtrB	NP_706258	LPS (VF0124)
D063	ctg_30_1	faeD	YP_002295985	K88 pili/F4 fimbriae (AI040)
D063	ctg_30_2	faeE	YP_002295986	K88 pili/F4 fimbriae (AI040)
D063	ctg_30_3	faeF	YP_002295987	K88 pili/F4 fimbriae (AI040)
D063	ctg_30_4	faeG	YP_002295988	K88 pili/F4 fimbriae (AI040)
D063	ctg_30_5	faeH	YP_002295989	K88 pili/F4 fimbriae (AI040)
D063	ctg_30_6	faeI	YP_002295990	K88 pili/F4 fimbriae (AI040)
D063	ctg_30_7	faeJ	YP_002295991	K88 pili/F4 fimbriae (AI040)
D063	ctg_31_27	gspC	YP_404599	T2SS (VF0333)
D063	ctg_31_28	gspD	YP_404600	T2SS (VF0333)
D063	ctg_31_29	gspE	YP_404601	T2SS (VF0333)
D063	ctg_31_30	gspF	YP_404602	T2SS (VF0333)
D063	ctg_31_31	gspG	YP_404603	T2SS (VF0333)
D063	ctg_31_32	gspH	YP_404604	T2SS (VF0333)
D063	ctg_31_33	gspI	YP_404605	T2SS (VF0333)
D063	ctg_31_34	gspJ	YP_404606	T2SS (VF0333)
D063	ctg_31_35	gspK	YP_404607	T2SS (VF0333)
D063	ctg_31_36	gspL	YP_404608	T2SS (VF0333)
D063	ctg_31_37	gspM	YP_404609	T2SS (VF0333)
D063	ctg_32_45	faeI	YP_002295990	K88 pili/F4 fimbriae (AI040)
D063	ctg_32_46	faeH	YP_002295989	K88 pili/F4 fimbriae (AI040)
D063	ctg_32_49	faeF	YP_002295987	K88 pili/F4 fimbriae (AI040)
D063	ctg_32_50	faeE	YP_002295986	K88 pili/F4 fimbriae (AI040)
D063	ctg_7_345	csgB	NP_460114	Agf (VF0103)
D063	ctg_7_346	csgD	NP_460113	curli fibers/thin aggregative fimbriae (AGF) (AI094)
D063	ctg_7_348	csgF	NP_460111	Agf (VF0103)
D063	ctg_7_349	csgG	NP_460110	Agf (VF0103)
D063	ctg_8_200	fdeC	YP_002390132	FdeC (VF0506)
D063	ctg_8_204	ykgK/ecpR	NP_286011	ECP (VF0404)
D063	ctg_8_205	yagZ/ecpA	NP_286010	ECP (VF0404)
D063	ctg_8_206	yagY/ecpB	NP_286009	ECP (VF0404)
D063	ctg_8_207	yagX/ecpC	NP_286008	ECP (VF0404)
D063	ctg_8_208	yagW/ecpD	NP_286007	ECP (VF0404)
D063	ctg_8_209	yagV/ecpE	NP_286006	ECP (VF0404)
D063	ctg_9_177	espX5	NP_290699	LEE encoded T3SS (SS020)
D070	ctg_16_149	EF0485	NP_814266	AS (VF0352)
D070	ctg_170_2	cylR2	AAM75247	Cytolysin (VF0356)
D070	ctg_170_3	cylR1	AAM75248	Cytolysin (VF0356)
D070	ctg_170_4	cylL	AAM75249	Cytolysin (VF0356)
D070	ctg_170_5	cylS	AAM75250	Cytolysin (VF0356)
D070	ctg_170_6	cylM	AAM75251	Cytolysin (VF0356)
D070	ctg_170_7	cylB	AAM75252	Cytolysin (VF0356)
D070	ctg_170_8	cylA	AAM75253	Cytolysin (VF0356)
D070	ctg_1_226	cpsA	NP_816141	Capsule (VF0361)
D070	ctg_1_227	cpsB	NP_816140	Capsule (VF0361)
D070	ctg_1_228	cpsC	NP_816139	Capsule (VF0361)
D070	ctg_1_229	cpsD	NP_816138	Capsule (VF0361)
D070	ctg_1_230	cpsE	NP_816137	Capsule (VF0361)
D070	ctg_1_231	cpsF	NP_816136	Capsule (VF0361)
D070	ctg_1_232	cpsG	NP_816135	Capsule (VF0361)
D070	ctg_1_233	cpsH	NP_816134	Capsule (VF0361)
D070	ctg_1_234	cpsI	NP_816133	Capsule (VF0361)
D070	ctg_1_235	cpsJ	NP_816132	Capsule (VF0361)
D070	ctg_1_236	cpsK	NP_816131	Capsule (VF0361)
D070	ctg_1_469	efaA	NP_815739	EfaA (VF0354)
D070	ctg_7_19	ebpA	NP_814821	Ebp pili (VF0538)
D070	ctg_7_20	ebpB	NP_814822	Ebp pili (VF0538)
D070	ctg_7_21	ebpC	NP_814823	Ebp pili (VF0538)
D070	ctg_7_22	srtC	NP_814824	Ebp pili (VF0538)
D070	ctg_8_116	fss1	NP_813892	Fibrinogen binding protein (AI271)
D070	ctg_9_114	bopD	NP_814691	BopD (VF0362)
D084	ctg_3_14	fss3	NP_815578	Fibrinogen binding protein (AI273)
D105	ctg_10_120	fss1	NP_813892	Fibrinogen binding protein (AI271)
D105	ctg_15_149	EF0485	NP_814266	AS (VF0352)
D105	ctg_1_157	efaA	NP_815739	EfaA (VF0354)
D105	ctg_1_390	cpsK	NP_816131	Capsule (VF0361)
D105	ctg_1_391	cpsJ	NP_816132	Capsule (VF0361)
D105	ctg_1_392	cpsI	NP_816133	Capsule (VF0361)
D105	ctg_1_393	cpsH	NP_816134	Capsule (VF0361)
D105	ctg_1_394	cpsG	NP_816135	Capsule (VF0361)
D105	ctg_1_395	cpsF	NP_816136	Capsule (VF0361)
D105	ctg_1_396	cpsE	NP_816137	Capsule (VF0361)
D105	ctg_1_397	cpsD	NP_816138	Capsule (VF0361)
D105	ctg_1_398	cpsC	NP_816139	Capsule (VF0361)
D105	ctg_1_399	cpsB	NP_816140	Capsule (VF0361)
D105	ctg_1_400	cpsA	NP_816141	Capsule (VF0361)
D105	ctg_1_409	fss2	NP_816151	Fibrinogen binding protein (AI272)
D105	ctg_2_36	ebpA	NP_814821	Ebp pili (VF0538)
D105	ctg_2_37	ebpB	NP_814822	Ebp pili (VF0538)
D105	ctg_2_38	ebpC	NP_814823	Ebp pili (VF0538)
D105	ctg_2_39	srtC	NP_814824	Ebp pili (VF0538)
D105	ctg_3_114	bopD	NP_814691	BopD (VF0362)
D105	ctg_4_286	EF3023	NP_816637	Hyaluronidase (VF0359)
D105	ctg_57_2	cylR2	AAM75247	Cytolysin (VF0356)
D105	ctg_57_3	cylR1	AAM75248	Cytolysin (VF0356)
D105	ctg_57_4	cylL	AAM75249	Cytolysin (VF0356)
D105	ctg_57_5	cylS	AAM75250	Cytolysin (VF0356)
D105	ctg_57_6	cylM	AAM75251	Cytolysin (VF0356)
D105	ctg_57_7	cylB	AAM75252	Cytolysin (VF0356)
D105	ctg_57_8	cylA	AAM75253	Cytolysin (VF0356)
D107	ctg_13_106	bopD	NP_814691	BopD (VF0362)
D107	ctg_1_131	fsrA	NP_815519	Fsr (VF0360)
D107	ctg_1_132	fsrB	NP_815518	Fsr (VF0360)
D107	ctg_1_133	fsrC	NP_815517	Fsr (VF0360)
D107	ctg_1_134	gelE	NP_815516	Gelatinase (VF0357)
D107	ctg_1_135	sprE	NP_815515	SprE (VF0358)
D107	ctg_29_82	srtC	NP_814824	Ebp pili (VF0538)
D107	ctg_29_83	ebpC	NP_814823	Ebp pili (VF0538)
D107	ctg_29_84	ebpB	NP_814822	Ebp pili (VF0538)
D107	ctg_29_85	ebpA	NP_814821	Ebp pili (VF0538)
D107	ctg_3_273	cpsK	NP_816131	Capsule (VF0361)
D107	ctg_3_274	cpsJ	NP_816132	Capsule (VF0361)
D107	ctg_3_275	cpsI	NP_816133	Capsule (VF0361)
D107	ctg_3_276	cpsH	NP_816134	Capsule (VF0361)
D107	ctg_3_277	cpsG	NP_816135	Capsule (VF0361)
D107	ctg_3_278	cpsF	NP_816136	Capsule (VF0361)
D107	ctg_3_279	cpsE	NP_816137	Capsule (VF0361)
D107	ctg_3_280	cpsD	NP_816138	Capsule (VF0361)
D107	ctg_3_281	cpsC	NP_816139	Capsule (VF0361)
D107	ctg_3_282	cpsB	NP_816140	Capsule (VF0361)
D107	ctg_3_283	cpsA	NP_816141	Capsule (VF0361)
D107	ctg_3_52	efaA	NP_815739	EfaA (VF0354)
D111	ctg_21_10	yagV/ecpE	NP_286006	ECP (VF0404)
D111	ctg_21_5	ykgK/ecpR	NP_286011	ECP (VF0404)
D111	ctg_21_6	yagZ/ecpA	NP_286010	ECP (VF0404)
D111	ctg_21_7	yagY/ecpB	NP_286009	ECP (VF0404)
D111	ctg_21_8	yagX/ecpC	NP_286008	ECP (VF0404)
D111	ctg_21_9	yagW/ecpD	NP_286007	ECP (VF0404)
D111	ctg_22_130	entA	NP_752614	Enterobactin (VF0228)
D111	ctg_22_131	entB	NP_752613	Enterobactin (VF0228)
D111	ctg_22_138	fepC	NP_752606	Enterobactin (VF0228)
D111	ctg_6_381	ompA	AAF37887	OmpA (VF0236)
D113	ctg_19_240	east1	AHY03744	EAST1 (VF0188)
D113	ctg_32_66	ompA	AAF37887	OmpA (VF0236)
D113	ctg_4_747	csgB	NP_460114	Agf (VF0103)
D113	ctg_4_748	csgD	NP_460113	curli fibers/thin aggregative fimbriae (AGF) (AI094)
D113	ctg_4_749	csgE	NP_460112	Agf (VF0103)
D113	ctg_4_750	csgF	NP_460111	Agf (VF0103)
D113	ctg_4_751	csgG	NP_460110	Agf (VF0103)
D113	ctg_5_286	entA	NP_752614	Enterobactin (VF0228)
D113	ctg_5_287	entB	NP_752613	Enterobactin (VF0228)
D113	ctg_5_288	entE	NP_752612	Enterobactin (VF0228)
D113	ctg_5_293	fepG	NP_752607	Enterobactin (VF0228)
D113	ctg_5_294	fepC	NP_752606	Enterobactin (VF0228)
D118	ctg_27_54	ompA	AAF37887	OmpA (VF0236)
D118	ctg_31_115	csgB	NP_460114	Agf (VF0103)
D118	ctg_31_116	csgD	NP_460113	curli fibers/thin aggregative fimbriae (AGF) (AI094)
D118	ctg_31_117	csgE	NP_460112	Agf (VF0103)
D118	ctg_31_118	csgF	NP_460111	Agf (VF0103)
D118	ctg_31_119	csgG	NP_460110	Agf (VF0103)
D118	ctg_32_112	east1	AHY03744	EAST1 (VF0188)
D118	ctg_5_306	fepC	NP_752606	Enterobactin (VF0228)
D118	ctg_5_307	fepG	NP_752607	Enterobactin (VF0228)
D118	ctg_5_312	entE	NP_752612	Enterobactin (VF0228)
D118	ctg_5_313	entB	NP_752613	Enterobactin (VF0228)
D118	ctg_5_314	entA	NP_752614	Enterobactin (VF0228)
D119	ctg_19_144	fepC	NP_752606	Enterobactin (VF0228)
D119	ctg_19_145	fepG	NP_752607	Enterobactin (VF0228)
D119	ctg_19_150	entE	NP_752612	Enterobactin (VF0228)
D119	ctg_19_151	entB	NP_752613	Enterobactin (VF0228)
D119	ctg_19_152	entA	NP_752614	Enterobactin (VF0228)
D119	ctg_264_3	east1	AHY03744	EAST1 (VF0188)
D119	ctg_44_66	ompA	AAF37887	OmpA (VF0236)
D122	ctg_25_106	bopD	NP_814691	BopD (VF0362)
D122	ctg_2_1076	cpsK	NP_816131	Capsule (VF0361)
D122	ctg_2_1077	cpsJ	NP_816132	Capsule (VF0361)
D122	ctg_2_1078	cpsI	NP_816133	Capsule (VF0361)
D122	ctg_2_1079	cpsH	NP_816134	Capsule (VF0361)
D122	ctg_2_1080	cpsG	NP_816135	Capsule (VF0361)
D122	ctg_2_1081	cpsF	NP_816136	Capsule (VF0361)
D122	ctg_2_1082	cpsE	NP_816137	Capsule (VF0361)
D122	ctg_2_1083	cpsD	NP_816138	Capsule (VF0361)
D122	ctg_2_1084	cpsC	NP_816139	Capsule (VF0361)
D122	ctg_2_1085	cpsB	NP_816140	Capsule (VF0361)
D122	ctg_2_1086	cpsA	NP_816141	Capsule (VF0361)
D122	ctg_2_36	ebpA	NP_814821	Ebp pili (VF0538)
D122	ctg_2_37	ebpB	NP_814822	Ebp pili (VF0538)
D122	ctg_2_38	ebpC	NP_814823	Ebp pili (VF0538)
D122	ctg_2_39	srtC	NP_814824	Ebp pili (VF0538)
D122	ctg_2_670	sprE	NP_815515	SprE (VF0358)
D122	ctg_2_671	gelE	NP_815516	Gelatinase (VF0357)
D122	ctg_2_672	fsrC	NP_815517	Fsr (VF0360)
D122	ctg_2_673	fsrB	NP_815518	Fsr (VF0360)
D122	ctg_2_674	fsrA	NP_815519	Fsr (VF0360)
D122	ctg_2_855	efaA	NP_815739	EfaA (VF0354)
D129	ctg_13_59	entA	NP_752614	Enterobactin (VF0228)
D129	ctg_13_60	entB	NP_752613	Enterobactin (VF0228)
D129	ctg_13_61	entE	NP_752612	Enterobactin (VF0228)
D129	ctg_13_66	fepG	NP_752607	Enterobactin (VF0228)
D129	ctg_13_67	fepC	NP_752606	Enterobactin (VF0228)
D129	ctg_209_2	east1	AHY03744	EAST1 (VF0188)
D129	ctg_38_40	ompA	AAF37887	OmpA (VF0236)
D129	ctg_73_55	csgB	NP_460114	Agf (VF0103)
D129	ctg_73_56	csgD	NP_460113	curli fibers/thin aggregative fimbriae (AGF) (AI094)
D129	ctg_73_57	csgE	NP_460112	Agf (VF0103)
D129	ctg_73_58	csgF	NP_460111	Agf (VF0103)
D129	ctg_73_59	csgG	NP_460110	Agf (VF0103)
D130	ctg_3_221	ompA	AAF37887	OmpA (VF0236)
D130	ctg_3_276	flgH	YP_001006758	Flagella (VF0394)
D130	ctg_3_297	fliN	YP_001006749	Flagella (VF0394)
D130	ctg_3_298	fliM	YP_001006748	Flagella (VF0394)
D130	ctg_3_304	fliG	YP_001006742	Flagella (VF0394)
D130	ctg_4_236	iroN	NP_753164	IroN (VF0230)
D130	ctg_4_240	iroB	NP_753168	Salmochelin (IA013)
D130	ctg_7_356	entB	NP_752613	Enterobactin (VF0228)
D130	ctg_7_357	entA	NP_752614	Enterobactin (VF0228)
D130	ctg_7_72	yagZ/ecpA	NP_286010	ECP (VF0404)

## Sheet: ST5
Table S5| Detailed information of the bile metabolism genes of the species.
	Strain name	BSH	BSH1	baiE	baiA	baiB	baiF	baiN	Total
D060	Lysinibacillus sp. D060	0	0	0	20	8	2	1	31
D128	Solibacillus silvestris D128	0	0	0	16	12	3	0	31
D040	Paenibacillus lautus D040	0	0	0	22	1	0	0	23
D008	Klebsiella pneumoniae D008	0	0	0	15	2	0	0	17
D028	Klebsiella aerogenes D028	0	0	0	13	0	0	0	13
D036	Klebsiella pneumoniae D036	0	0	0	10	2	0	0	12
D055	Klebsiella aerogenes D055	0	0	0	12	0	0	0	12
D057	Klebsiella aerogenes D057	0	0	0	12	0	0	0	12
D093	Psychrobacter sp. D093	0	0	0	9	1	2	0	12
D111	Klebsiella pneumoniae D111	0	0	0	10	2	0	0	12
D130	Klebsiella aerogenes D130	0	0	0	12	0	0	0	12
D044	Enterococcus faecalis D044	1	0	0	5	1	0	1	8
D050	Enterococcus casseliflavus D050	2	0	0	4	1	0	1	8
D062	Citrobacter sp. CRE-46 strain D062	0	0	0	6	1	1	0	8
D070	Enterococcus faecalis D070	1	0	0	5	1	0	1	8
D105	Enterococcus faecalis D105	1	0	0	5	1	0	1	8
D113	Citrobacter sp. CRE-46 strain D113	0	0	0	6	1	1	0	8
D118	Citrobacter sp. CRE-46 strain D118	0	0	0	6	1	1	0	8
D023	Enterococcus sp. FDAARGOS_553 strain D023	1	0	0	4	1	0	1	7
D114	Staphylococcus pettenkoferi D114	1	0	1	5	0	0	0	7
D119	Citrobacter sp. CRE-46 strain D119	0	0	0	5	1	1	0	7
D129	Citrobacter sp. CRE-46 strain D129	0	0	0	5	1	1	0	7
D131	Enterococcus sp. FDAARGOS_553 strain D131	1	0	0	4	1	0	1	7
D135	Providencia sp. D135	0	0	0	5	0	2	0	7
D063	Escherichia coli D063	0	1	0	3	0	2	0	6
D084	Enterococcus sp. FDAARGOS_553 strain D084	1	0	0	4	1	0	0	6
D107	Enterococcus faecalis D107	0	0	0	4	1	0	1	6
D122	Enterococcus faecalis D122	0	0	0	4	1	0	1	6
D074	Vibrio sp. D074	0	0	0	3	2	0	0	5
D097	Morganella morganii D097	0	0	0	4	1	0	0	5
D049	Escherichia coli D049	0	0	0	2	0	2	0	4
D092	Corynebacterium testudinoris D092	0	0	0	1	2	0	0	3
D095	Corynebacterium testudinoris D095	0	0	0	1	2	0	0	3
D024	Lactobacillus murinus D024	1	0	0	0	0	0	0	1
D090	Lactobacillus murinus D090	1	0	0	0	0	0	0	1
